# Supplementary material for: Construction of diverse polycyclic N-heterocycles via cascade allylic amination/Diels–Alder reaction
Source: Royal Society of Chemistry journal article supplement (doi:10.1039/d2cc05208c), 2022-01-01
Supplement: d2cc05208c1.pdf [file d2cc05208c1.pdf]

## Supporting Information

### Construction of Diverse Polycyclic *N*-Heterocycles *via* Cascade Allylic Amination/Diels–Alder Reaction

Zhenkun Yang,<sup>1</sup> Hongling Xie,<sup>1</sup> Luning Tang,<sup>1</sup> Jianwei Sun,<sup>1,2</sup> Zhengyu Han,<sup>1</sup>  
and Hai Huang<sup>1,\*</sup>

<sup>1</sup> *Jiangsu Key Laboratory of Advanced Catalytic Materials & Technology, School of  
Petrochemical Engineering, Changzhou University, Changzhou (China)*

<sup>2</sup> *Department of Chemistry, The Hong Kong University of Science and Technology,  
Clear Water Bay, Kowloon, Hong Kong SAR (China)*

## Table of contents

|                                                                                         |     |
|-----------------------------------------------------------------------------------------|-----|
| I. General Information .....                                                            | S1  |
| II. Preparation of Substrates 1 .....                                                   | S2  |
| III. The Optimization of Reaction Conditions.....                                       | S10 |
| IV. Synthesis of Hydrophenanthridine and Hydrogenated Isoquinoline<br>Derivatives ..... | S11 |
| V. Synthetic Transformation of Hydrophenanthridines .....                               | S28 |
| VI. Determination of Product Structure.....                                             | S32 |

## I. General Information

Flash column chromatography was performed over silica gel (200-300 mesh) purchased from Qindao Puke Co. Lit., China. All air or moisture sensitive reactions were conducted in oven-dried glassware under nitrogen atmosphere using anhydrous solvents. Anhydrous toluene, acetonitrile, dichloromethane, chloroform, methanol, and tetrahydrofuran were purified by the Innovative® solvent purification system. Other anhydrous solvents were purchased from J&K Scientific.  $^1\text{H}$ ,  $^{13}\text{C}$ , and  $^{19}\text{F}$  NMR spectra were collected on a Bruker AV 400 MHz NMR spectrometer using residue solvent peaks as an internal standard ( $^1\text{H}$  NMR:  $\text{CDCl}_3$  at 7.26 ppm, acetone- $d_6$  at 2.05 ppm;  $^{13}\text{C}$  NMR:  $\text{CDCl}_3$  at 77.0 ppm, acetone- $d_6$  at 29.8 ppm). HRMS spectra were performed on a Waters mass spectrometer. The X-ray data was collected by SuperNova, Dual, Cu at zero, Atlas diffractometer.

## II. Preparation of Substrates 1

Vinyl amines **1a-1m**, as shown below, were synthesized according to the following procedures.

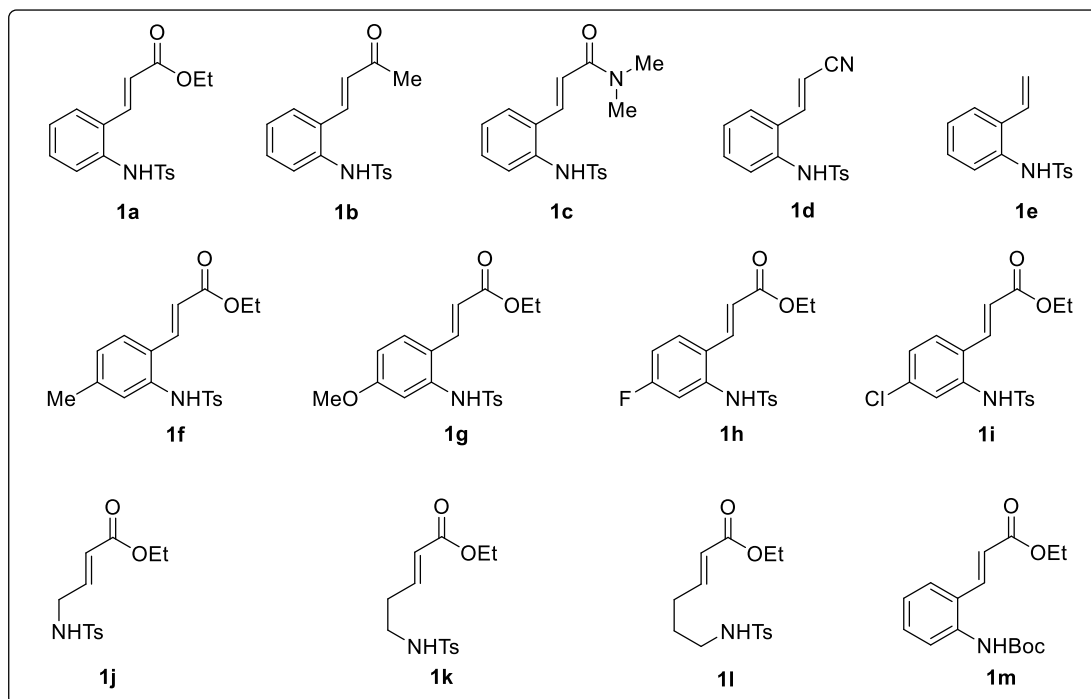

### General Procedure A: Preparation of *o*-tosylamidocinnamic acid derivatives (**1a-1d**, **1f-1i**)<sup>[1]</sup>.

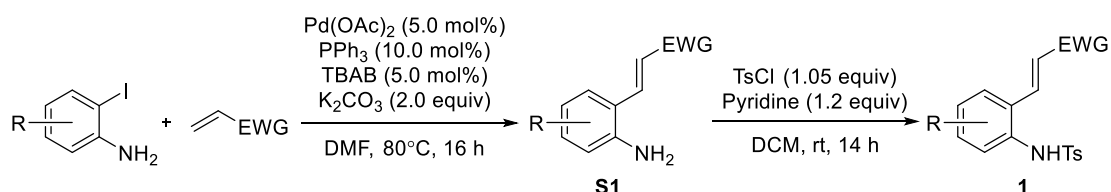

***o*-Vinyl anilines (S1):** Under N<sub>2</sub> at room temperature, to an oven dried round bottom flask was charged with substituted *ortho*-iodoanilines (10.0 mmol, 1.0 equiv.), olefins (20.0 mmol, 2.0 equiv.), K<sub>2</sub>CO<sub>3</sub> (2.8 g, 20.0 mmol, 2.0 equiv.), Pd(OAc)<sub>2</sub> (112.0 mg, 0.5 mmol, 5.0 mol%), PPh<sub>3</sub> (262.0 mg, 1.0 mmol, 10 mol%) and tetrabutylammonium bromide (TBAB) (161.0 mg, 0.5 mmol, 5.0 mol%) followed by the addition of DMF (40.0 mL). The mixture was allowed

[1] B. Harish, S. Yadav and S. Suresh, *Chem. Commun.*, 2021, **57**, 231-234.

to stir at 80 °C for 12 h, and then diluted with EtOAc (50.0 mL), washed with water (20.0 × 3 mL), brine (40.0 mL), dried over anhydrous Na<sub>2</sub>SO<sub>4</sub>, and concentrated under reduced pressure. The residue was purified by silica gel column chromatography (petroleum ether/EtOAc = 3:1) to afford the *ortho*-aminocinnamic acid derivatives **S1**.

***o*-Tosylamidocinnamic acid derivatives (1):** Under air at room temperature, to a stirred solution of *ortho*-aminocinnamic acid derivatives **S1** (1.0 mmol, 1.0 equiv.) in dry DCM (8.0 mL) was added dry pyridine (0.1 mL, 1.2 mmol, 1.2 equiv.) followed by *p*-toluenesulfonyl chloride (200.0 mg, 1.1 mmol, 1.1 equiv.). The reaction mixture was stirred at room temperature for 14 h, and then dry MeOH (5.0 mL) was added. The mixture was concentrated under reduced pressure, and the residue was partitioned between EtOAc (20.0 mL) and 2 N HCl (20.0 mL). The organic layer was separated, and the aqueous layer was extracted with EtOAc (20.0 × 3 mL). The combined organic layers were washed with saturated aqueous NaHCO<sub>3</sub> (20.0 mL), brine (20.0 mL), dried over anhydrous Na<sub>2</sub>SO<sub>4</sub>, and concentrated under reduced pressure to afford the desired *o*-tosylamidocinnamic acid derivatives **1**.

#### Characterization data for new compounds.

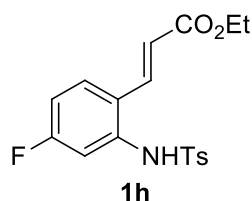

**(E)-Ethyl-3-(4-fluoro-2-(4-methylphenylsulfonamido)phenyl)acrylate (1h)** was prepared according to the General Procedure A as a white solid (chromatography eluent: Dichloromethane/EtOAc = 5:1) in 62% yield (670.0 mg).

<sup>1</sup>H NMR (300 MHz, CDCl<sub>3</sub>) δ 7.62 (d, *J* = 8.34 Hz, 2H), 7.50-7.36 (m, 2H), 7.28-7.19 (m, 3H), 7.14 (s, 1H), 6.90 (td, *J*<sub>1</sub> = 2.52 Hz, *J*<sub>2</sub> = 8.16 Hz, 1H), 6.09 (d, *J*

= 15.69 Hz, 1H), 4.24 (q,  $J = 7.14$  Hz, 2H), 2.37 (s, 3H), 1.33 (t,  $J = 7.11$  Hz, 3H) ppm.

$^{13}\text{C}$  NMR (75 MHz,  $\text{CDCl}_3$ )  $\delta$  166.57, 164.47 (d,  $J = 249.75$  Hz), 144.17, 137.96, 136.58 (d,  $J = 10.5$  Hz), 135.66, 129.74, 128.66 (d,  $J = 9.0$  Hz), 127.16, 125.45 (d,  $J = 3.0$  Hz), 120.42 (d,  $J = 1.5$  Hz), 114.03 (d,  $J = 21.75$  Hz), 113.29 (d,  $J = 24.0$  Hz), 60.91, 21.46, 14.19 ppm.

$^{19}\text{F}$  NMR (300 MHz,  $\text{CDCl}_3$ )  $\delta$  -107.58 ppm.

HRMS ( $\text{CI}^+$ ) calculated for  $\text{C}_{18}\text{H}_{19}\text{FNO}_4\text{S}$  [ $\text{M} + \text{H}$ ] $^+$ : 364.1019, found: 364.1018.

### Preparation of ethyl (*E*)-3-(2-((*tert*-butoxycarbonyl)amino)phenyl)acrylate **1m**.

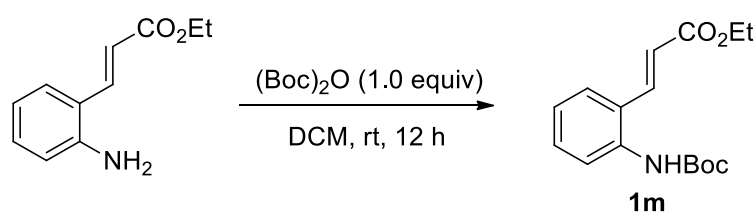

**Ethyl (*E*)-3-(2-((*tert*-butoxycarbonyl)amino)phenyl)acrylate (**1m**):** Under  $\text{N}_2$  at room temperature, to an oven dried 100-mL Schlenk flask was charged with a solution of (*E*)-ethyl 3-(2-aminophenyl)acrylate (573.0 mg, 3.0 mmol, 1.0 equiv.) in DCM (20.0 mL) followed by the addition of (Boc)<sub>2</sub>O (655.0 mg, 3.0 mmol, 1.0 equiv.). The reaction mixture was stirred for 12 h at room temperature. The mixture was diluted with DCM (30.0 mL), washed with saturated aqueous  $\text{NaHCO}_3$  (20.0 mL), water (20.0  $\times$  3 mL), brine (40.0 mL), dried over anhydrous  $\text{Na}_2\text{SO}_4$ , and concentrated under reduced pressure to afford **1m** in 86% yield (755.0 mg).

## Preparation of 4-tosylamino-enoic ester derivatives (**1j-1k**)<sup>[2]</sup>.

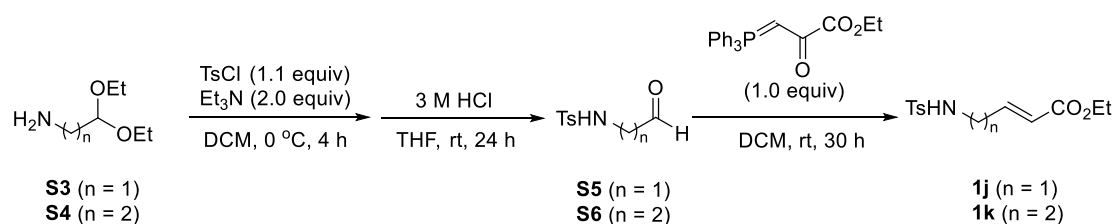

**4-Methyl-N-(2-oxoethyl)benzenesulfonamide (S5):** At 0 °C, to a stirred solution of 2,2-diethoxyethan-1-amine **S3** (0.7 mL, 5.0 mmol, 1.0 equiv.) and anhydrous Et<sub>3</sub>N (1.4 mL, 10.0 mmol, 2.0 equiv.) in DCM (10.0 mL) was added dropwise a solution of *p*-toluenesulfonyl chloride (1.1 g, 5.5 mmol, 1.1 equiv.) in DCM (10.0 mL) over 0.5 h. Then the reaction mixture was stirred at 0 °C for another 12 h. The mixture was diluted with DCM (30.0 mL), washed with 1 M aq. HCl (50.0 mL), water (10.0 mL), and saturated aq. NaHCO<sub>3</sub> (100.0 mL), dried over anhydrous Na<sub>2</sub>SO<sub>4</sub>, and concentrated under reduced pressure. The residue was purified by silica gel column chromatography (petroleum ether/EtOAc = 4:1) to afford the *N*-(2,2-diethoxyethyl)-4-methylbenzenesulfonamide as a white solid. The resulted solid was directly dissolved in THF (10.0 mL) followed by the addition of 3 M HCl (15.0 mL). Then the reaction mixture was stirred at room temperature for 24 h. The reaction mixture was diluted with EtOAc (50.0 mL), washed with brine (50.0 mL), dried over anhydrous Na<sub>2</sub>SO<sub>4</sub>, and concentrated under reduced pressure to afford **S5** in >99% yield (1.1 g) which was used without further purification.

**Ethyl (E)-4-((4-methylphenyl)sulfonamido)but-2-enoate (1j):** At room temperature, to a solution of **S5** (639 mg, 3.0 mmol, 1.0 equiv.) in DCM (20.0 mL) was added Wittig reagent (1.13 g, 3.0 mmol, 1.0 equiv.). The solution was stirred at room temperature for 30 h. The reaction mixture was concentrated under reduced pressure. The residue was purified by silica gel column chromatography (petroleum ether/EtOAc = 3:1) to afford **1j** as a brown solid in 31% yield (263.0 mg).

[2] B.-L. Zhao and D.-M. Du, *Asian J. Org. Chem.*, 2015, **4**, 1120-1126.

Compounds **1k** was prepared according to the above procedure.

### Preparation of 4-tosylamino-2-enoic ester derivatives (**1l**)<sup>[3]</sup>.

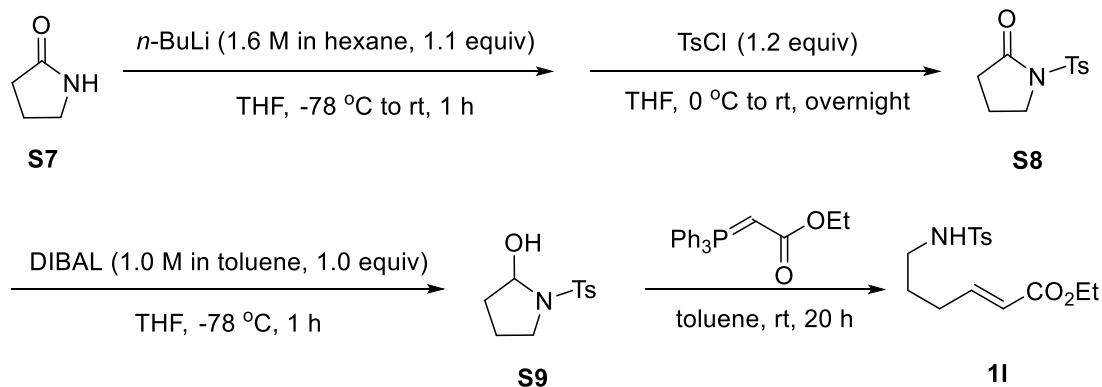

***N*-*p*-Tosylpyrrolidone (**S8**):** Under N<sub>2</sub> at -78 °C, to an oven dried 200-mL flask was charged with 2-pyrrolidone (2.3 mL, 30.0 mmol, 1.0 equiv.) and anhydrous THF (120.0 mL) followed by dropwise addition of *n*-BuLi (1.6 M in hexanes, 13.8 mL, 33.0 mmol, 1.1 equiv.) over 10 min. The mixture was then stirred at -78 °C for 1 h then a solution of *p*-toluenesulfonyl chloride (6.8 g, 36.0 mmol, 1.2 equiv.) in THF (30.0 mL) was added dropwise over 20 min. The reaction was kept stirring at -78 °C for another 20 min and then warmed up to room temperature. After 12 h, the reaction was quenched by slowly adding saturated aqueous solution of NH<sub>4</sub>Cl (30.0 mL) and extracted with EtOAc (100.0 × 3 mL). The combined organic layers were washed with brine (100 mL), dried over anhydrous Na<sub>2</sub>SO<sub>4</sub> and concentrated under reduced pressure. The residue was purified by recrystallization from *n*-hexane to yield *N*-*p*-tosylpyrrolidone **S8** as a white solid in 70% yield (5.0 g).

**Hemiaminal (**S9**):** Under N<sub>2</sub> at -78 °C, to a stirred solution of **S6** (2.4 g, 10.0 mmol, 1.0 equiv.) in THF (20.0 mL) was added DIBAL (1.0 M solution in toluene, 10.0 mL, 10.0 mmol, 1.0 equiv.). The resulting mixture was stirred at -78 °C for 1 h. The reaction mixture was quenched with MeOH and added a

[3] (a) W. L. Jia, N. Westerveld and K. M. Wong, *Org. Lett.*, 2019, **21**, 9339-9342.  
(b) T. Azuma, A. Murata and Y. Kobayashi, *Org. Lett.*, 2014, **16**, 4256-4259.

saturated solution of potassium sodium tartrate (30 mL). The organic layer was separated and the aqueous layer was extracted with DCM (30.0 × 3 mL). The combined organic layers were washed with brine (50 mL), dried over anhydrous Na<sub>2</sub>SO<sub>4</sub>, and concentrated under reduced pressure to give the crude hemiaminal **S9** in 89% yield (2.2 g) which was used for the next step without further purification.

**4-tosylamino-2- enoic ester derivatives (11):** At room temperature, to a stirred solution of crude hemiaminal **S9** (724.0 mg, 3.0 mmol, 1.0 equiv.) in toluene (25.0 mL) was added Wittig reagent (2.1 g, 6.0 mmol, 2.0 equiv.). The solution was stirred at room temperature for 30 h. The reaction mixture was concentrated under reduced pressure. The residue was purified by column chromatography on silica gel (petroleum ether/EtOAc = 7:1) to afford **1j** as a colorless oil in 97.0% yield (907.0 mg).

<sup>1</sup>H NMR (400 MHz, CDCl<sub>3</sub>) δ 7.73 (d, *J* = 8.24 Hz, 2H), 7.29 (d, *J* = 8.16 Hz, 2H), 6.87-6.76 (m, 1H), 5.73 (d, *J* = 15.68 Hz, 1H), 4.97 (s, 1H), 4.15 (q, *J* = 7.18 Hz, 2H), 3.00-2.87 (m, 2H), 2.41 (s, 3H), 2.22-2.14 (m, 2H), 1.66-1.55 (m, 2H), 1.26 (t, *J* = 7.12 Hz, 3H) ppm.

<sup>13</sup>C NMR (100 MHz, CDCl<sub>3</sub>) δ 166.40, 147.29, 143.44, 136.79, 129.70, 127.00, 122.08, 60.23, 42.40, 28.93, 27.92, 21.45, 14.18 ppm.

HRMS (CI<sup>+</sup>) calculated for C<sub>15</sub>H<sub>22</sub>NO<sub>4</sub>S [M + H]<sup>+</sup>: 312.1270, found: 312.1282.

Alkynyl amines **4a-4f**, as shown below, were synthesized according to the following procedure.

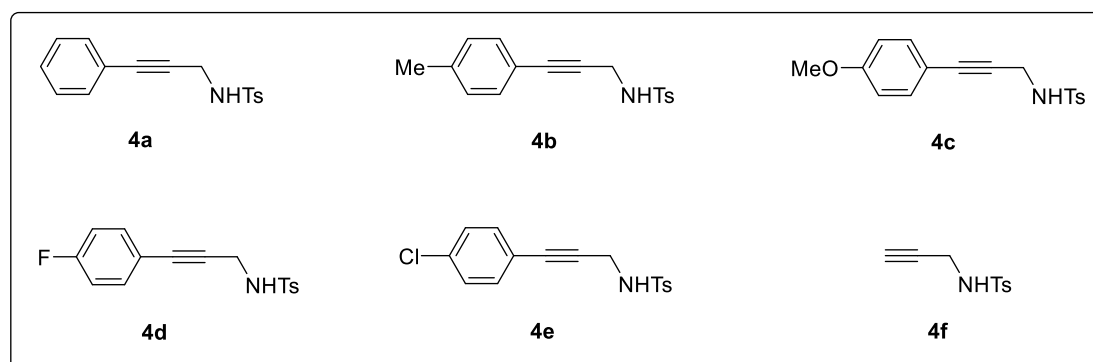



**General Procedure B: Preparation of the 3-substituted propargyl amines (4a-4f)<sup>[4]</sup>.**

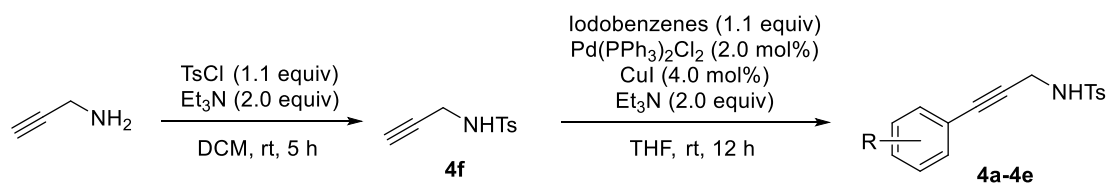

**4-Methyl-N-(prop-2-yn-1-yl)benzenesulfonamide (4f):** Under N<sub>2</sub> at 0 °C, to a stirred solution of commercially available propargylamine (2.0 mL, 30.0 mmol, 1.0 equiv.) in DCM (60.0 mL) was added triethylamine (4.2 mL, 45.0 mmol, 1.5 equiv.), followed by tosyl chloride (6.2 g, 33.0 mmol, 1.1 equiv.) portionwise. The resulting mixture was stirred at room temperature for 5 h. The reaction mixture was quenched with water (30.0 mL) and extracted with DCM (30.0 × 3 mL). The combined organic layers were dried over anhydrous Na<sub>2</sub>SO<sub>4</sub> and concentrated under reduced pressure to afford the quantitatively pure **4f** (5.9 g, 95%) as a white solid which was further purified by recrystallization from ether.

**4-Methyl-N-(3-phenylprop-2-yn-1-yl)benzenesulfonamide (4a):** under N<sub>2</sub> at room temperature, to an oven dried 50-mL flask was charged with phenyl iodides (0.7 mL, 6.0 mmol, 1.2 equiv.), PdCl<sub>2</sub>(PPh<sub>3</sub>)<sub>2</sub> (70.2 mg, 0.1 mmol, 2.0 mol%), CuI (38.0 mg, 0.2 mmol, 4.0 mol%), Et<sub>3</sub>N (1.4 mL, 10.0 mmol, 2.0 equiv.) and dry THF (30.0 mL) followed by the addition of **4f** (1.05 g, 5.0 mmol, 1.0 equiv.). The resulting reaction mixture was stirred at room temperature for 12 h. The mixture was quenched with saturated aqueous solution of NH<sub>4</sub>Cl (30.0 mL) and the organic layer was separated. The aqueous layer was extracted with ethyl acetate (30.0 × 3 mL). The combined organic layers were dried over anhydrous Na<sub>2</sub>SO<sub>4</sub> and concentrated under reduced pressure. The residue was purified by silica gel column chromatography (petroleum

[4] (a) C. Chen, Y. Huang and Z. Zhang, *Chem. Commun.*, 2017, **53**, 4612-4615.  
(b) F. Bodinier, Y. Sanogo, J. Ardisson, *Chem. Commun.*, 2021, **57**, 3603-3606.

ether/EtOAc = 10:1) to give the desired product **4a** as white solid in 73% yield (1.1 g).

Compounds **4b-4e** was prepared according to the General Procedure B.

### III. The Optimization of Reaction Conditions

**Table S1.** The optimization of reaction conditions<sup>a</sup>

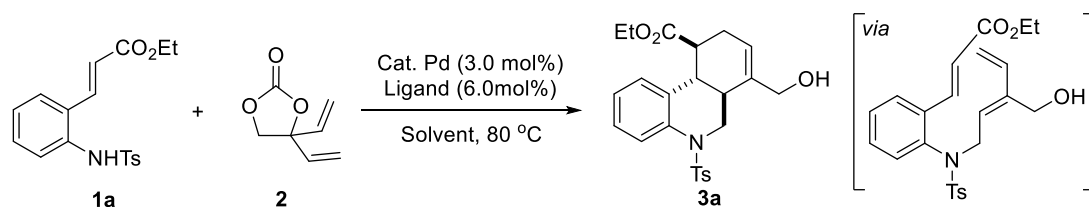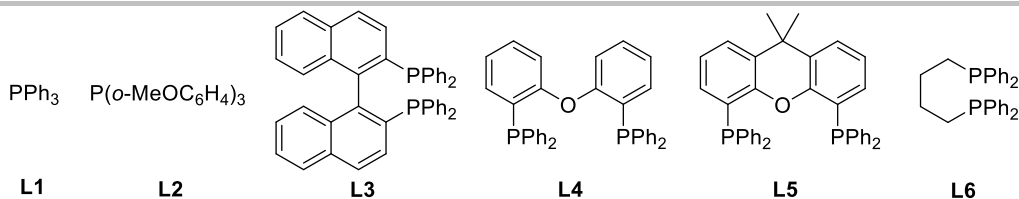

| entry | solvent     | Cat. Pd                     | ligand | Yield <sup>b</sup> |
|-------|-------------|-----------------------------|--------|--------------------|
| 1     | Toluene     | $\text{Pd}(\text{PPh}_3)_4$ | L1     | 61%                |
| 2     | PhCl        | $\text{Pd}(\text{PPh}_3)_4$ | L1     | 81%                |
| 3     | MeCN        | $\text{Pd}(\text{PPh}_3)_4$ | L1     | 50%                |
| 4     | 1,4-Dioxane | $\text{Pd}(\text{PPh}_3)_4$ | L1     | 80%                |
| 5     | THF         | $\text{Pd}(\text{PPh}_3)_4$ | L1     | 82%                |
| 6     | EA          | $\text{Pd}(\text{PPh}_3)_4$ | L1     | 81%                |
| 7     | DCE         | $\text{Pd}(\text{PPh}_3)_4$ | L1     | 84%                |
| 8     | DCE         | $\text{Pd}(\text{PPh}_3)_4$ | L2     | 87%                |
| 9     | DCE         | $\text{Pd}(\text{PPh}_3)_4$ | L3     | 69%                |
| 10    | DCE         | $\text{Pd}(\text{PPh}_3)_4$ | L4     | 88%                |
| 11    | DCE         | $\text{Pd}(\text{PPh}_3)_4$ | L5     | 91%                |
| 12    | DCE         | $\text{Pd}(\text{PPh}_3)_4$ | L6     | 88%                |
| 13    | DCE         | $\text{PdCl}_2$             | L5     | trace              |
| 14    | DCE         | $\text{Pd}(\text{OAc})_2$   | L5     | <10%               |
| 15    | DCE         | $\text{Pd}_2(\text{dba})_3$ | L5     | 62%                |
| 16    | DCE         | $\text{Pd}(\text{TFA})_2$   | L5     | trace              |

<sup>a</sup> Reaction conditions: **1a** (0.3 mmol), **2** (0.45 mmol), Cat. Pd (0.009 mmol, 3.0 mol%) and Ligand (0.018 mmol, 6.0 mol%) in Solvent (3.0 mL) at 80 °C for 24 h. <sup>b</sup> Determined by <sup>1</sup>H NMR using  $\text{CH}_2\text{Br}_2$  as an internal standard.

## IV. Synthesis of Hydrophenanthridine and Hydrogenated Isoquinoline Derivatives

### General Procedure C:

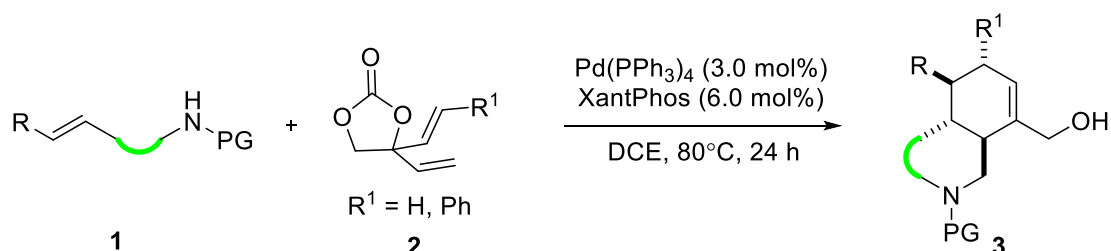

Under N<sub>2</sub>, to a solution of vinyl amines **1** (0.3 mmol, 1.0 equiv.) and divinyl-dioxolanones **2** (0.45 mmol, 1.5 equiv.) in DCE (3.0 mL) was added Pd(PPh<sub>3</sub>)<sub>4</sub> (10.5 mg, 9.0 × 10<sup>-3</sup> mmol, 3.0 mol%) and Xantphos (10.4 mg, 1.8 × 10<sup>-2</sup> mmol, 6.0 mol%). The reaction mixture was stirred at 80 °C for 24 h. The reaction mixture was concentrated under reduced pressure, then the residue was directly purified by silica gel column chromatography (eluent: petroleum ether/EtOAc) to afford the desired product **3**.

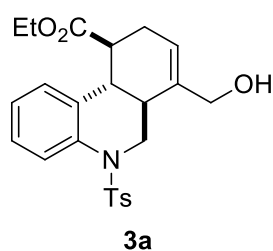

Ethyl 7- (hydroxymethyl)-5-tosyl-5, 6, 6a, 9, 10, 10a-hexahydrophenanthridine-10-carboxylate (**3a**) was prepared according to the General Procedure C as a yellow solid (chromatography eluent: petroleum ether/EtOAc = 3:1) in 80% yield (106.0 mg, *dr* > 20:1).

<sup>1</sup>H NMR (300 MHz, CDCl<sub>3</sub>) δ 7.74 (dd, *J*<sub>1</sub> = 8.07 Hz, *J*<sub>2</sub> = 1.08 Hz, 1H), 7.46 (d, *J* = 8.31 Hz, 2H), 7.28-7.25 (m, 1H), 7.21 (d, *J* = 8.13 Hz, 2H), 7.10 (td, *J*<sub>1</sub> = 7.62 Hz, *J*<sub>2</sub> = 1.14 Hz, 1H), 6.91 (d, *J* = 7.68 Hz, 1H), 5.75 (d, *J* = 5.79 Hz, 1H), 4.15-4.01 (m,

5H), 3.42 (t,  $J = 12.18$  Hz, 1H), 2.62 (td,  $J_1 = 11.49$  Hz,  $J_2 = 5.22$  Hz, 1H), 2.49-2.34 (m, 4H), 2.28-2.13 (m, 1H), 2.07-1.86 (m, 2H), 1.18 (t,  $J = 7.11$  Hz, 3H) ppm.

$^{13}\text{C}$  NMR (100 MHz,  $\text{CDCl}_3$ )  $\delta$  175.03, 143.56, 137.11, 136.01, 135.79, 135.38, 129.57, 126.95, 126.80, 126.54, 125.54, 122.41, 122.08, 64.14, 60.53, 50.35, 40.72, 40.52, 38.85, 28.88, 21.46, 14.03 ppm.

HRMS ( $\text{Cl}^-$ ) calculated for  $\text{C}_{24}\text{H}_{28}\text{NO}_5\text{S}$  [ $\text{M} + \text{H}$ ] $^+$ : 442.1688, found: 442.1689.

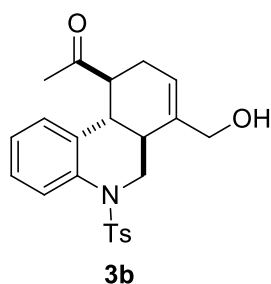

**1-(7-(Hydroxymethyl)-5-tosyl-5,6,9,10,10a-hexahydrophenanthridin-10-yl) ethanone (3b)** was prepared according to the General Procedure C as a yellow solid (chromatography eluent: petroleum ether/EtOAc = 3:1) in 82% yield (100.9 mg,  $dr > 20:1$ ).

$^1\text{H}$  NMR (400 MHz,  $\text{CDCl}_3$ )  $\delta$  7.72 (d,  $J = 7.96$  Hz, 1H), 7.41 (d,  $J = 8.16$  Hz, 2H), 7.29-7.15 (m, 3H), 7.08 (t,  $J = 7.44$  Hz, 1H), 6.65 (d,  $J = 7.6$  Hz, 1H), 5.74 (d,  $J = 5.04$  Hz, 1H), 4.12-3.97 (m, 3H), 3.45 (t,  $J = 11.84$  Hz, 1H), 2.69 (td,  $J_1 = 11.64$  Hz,  $J_2 = 5.28$  Hz, 1H), 2.40-2.23 (m, 4H), 2.23-2.11 (m, 1H), 1.97-1.84 (m, 5H), 1.84-1.73 (m, 1H) ppm.

$^{13}\text{C}$  NMR (100 MHz,  $\text{CDCl}_3$ )  $\delta$  210.99, 143.75, 137.11, 136.28, 135.77, 135.33, 129.61(2C), 127.22, 126.85, 125.92, 122.89, 121.85, 64.14, 50.51, 48.11, 41.03, 38.90, 28.04, 26.34, 21.40 ppm.

HRMS ( $\text{Cl}^-$ ) calculated for  $\text{C}_{23}\text{H}_{26}\text{NO}_4\text{S}$  [ $\text{M} + \text{H}$ ] $^+$ : 412.1583, found: 412.1582.

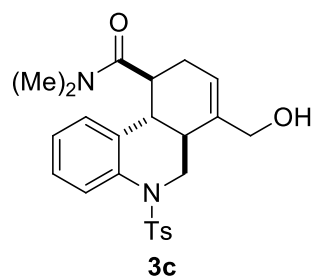

**7-(Hydroxymethyl)-N,N-dimethyl-5-tosyl-5,6,9,10-tetrahydrophenanthridine-10-carboxamide (3c)** was prepared according to the General Procedure C as a yellow solid (chromatography eluent: petroleum ether/EtOAc = 3:1) in 74% yield (97.5 mg, *dr* > 20:1).

$^1\text{H NMR}$  (400 MHz,  $\text{CDCl}_3$ )  $\delta$  7.31 (dd,  $J_1 = 8.08$  Hz,  $J_2 = 0.92$  Hz, 1H), 7.17 (d,  $J = 8.28$  Hz, 2H), 6.99 (d,  $J = 8.04$  Hz, 2H), 6.89-6.83 (m, 1H), 6.73 (td,  $J_1 = 1.00$  Hz,  $J_2 = 7.60$  Hz, 1H), 6.43 (d,  $J = 7.68$  Hz, 1H), 5.80 (d,  $J = 5.38$  Hz, 1H), 3.79-3.69 (m, 2H), 3.68-3.59 (m, 1H), 3.54 (t,  $J = 5.52$  Hz, 1H), 3.06 (t,  $J = 12.04$  Hz, 1H), 2.91 (s, 3H), 2.67-2.518 (m, 4H), 2.55 (s, 3H), 1.92-1.81 (m, 1H), 1.75-1.68 (m, 2H), 1.58-1.43 (m, 1H) ppm.

$^{13}\text{C NMR}$  (100 MHz,  $\text{CDCl}_3$ )  $\delta$  174.32, 144.38, 138.70, 137.56, 137.06, 136.85, 130.44, 127.56, 126.78, 125.93, 125.63, 123.97, 122.30, 64.05, 51.20, 41.39, 40.33, 37.02, 35.36, 28.70, 21.27 ppm.

**HRMS** ( $\text{Cl}^+$ ) calculated for  $\text{C}_{24}\text{H}_{29}\text{N}_2\text{O}_4\text{S}$  [ $\text{M} + \text{H}$ ] $^+$ : 441.1848, found: 441.1849.

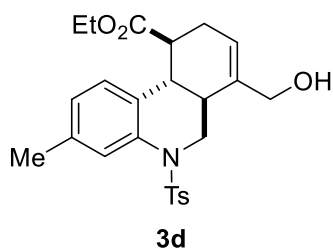

**Ethyl-7-(hydroxymethyl)-3-methyl-5-tosyl-5,6,9,10-tetrahydrophenanthridine-10-carboxylate (3d)** was prepared according to the General Procedure C as a Colorless solid, (chromatography eluent: petroleum ether/EtOAc = 3:1) in 86% yield (117.1 mg, *dr* > 20:1).

$^1\text{H NMR}$  (300 MHz,  $\text{CDCl}_3$ )  $\delta$  7.55 (s, 1H), 7.45 (d,  $J = 8.28$  Hz, 2H), 7.20 (d,  $J =$

8.01 Hz, 2H), 6.90 (d,  $J = 7.86$  Hz, 1H), 6.77 (d,  $J = 7.83$  Hz, 1H), 5.72 (d,  $J = 5.67$  Hz, 1H), 4.15-3.96 (m, 5H), 3.38 (t,  $J = 12.60$  Hz, 1H), 2.45-2.34 (m, 4H), 2.33 (s, 3H), 2.24-2.08 (m, 1H), 2.04-1.79 (m, 2H), 1.74 (s, 1H), 1.17 (t,  $J = 7.11$  Hz, 3H) ppm.

$^{13}\text{C}$  NMR (75 MHz,  $\text{CDCl}_3$ )  $\delta$  175.09, 143.50, 136.77, 136.09, 135.64, 135.47, 134.14, 129.55, 127.26, 126.87, 126.28, 122.17, 122.09, 64.21, 60.51, 50.36, 40.86, 40.68, 38.61, 28.93, 21.48, 21.14, 14.06 ppm.

HRMS ( $\text{Cl}^-$ ) calculated for  $\text{C}_{25}\text{H}_{30}\text{NO}_5\text{S}$  [ $\text{M} + \text{H}$ ] $^+$ : 456.1845, found: 456.1845.

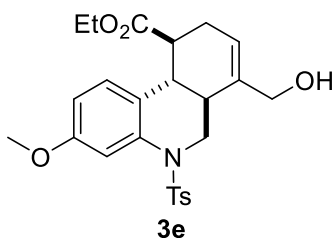

Ethyl-7-(hydroxymethyl)-3-methoxy-5-tosyl-5,6,9,10-tetrahydrophenanthridine-10-carboxylate (**3e**) was prepared according to the General Procedure C as a colorless solid, (chromatography eluent: petroleum ether/EtOAc = 3:1) in 87% yield (122.5 mg,  $dr = 10:1$ ).

*Major diastereomer*

$^1\text{H}$  NMR (300 MHz,  $\text{CDCl}_3$ )  $\delta$  7.45 (d,  $J = 8.25$  Hz, 2H), 7.31 (d,  $J = 2.58$  Hz, 1H), 7.18 (d,  $J = 8.16$  Hz, 2H), 6.77 (d,  $J = 8.52$  Hz, 1H), 6.62 (dd,  $J_1 = 8.52$  Hz,  $J_2 = 2.52$  Hz, 1H), 5.70 (d,  $J = 3.24$  Hz, 1H), 4.16-3.97 (m, 5H), 3.77 (s, 3H), 3.36 (t,  $J = 11.79$  Hz, 1H), 2.54 (td,  $J_1 = 11.40$  Hz,  $J_2 = 6.00$  Hz, 1H), 2.43-2.29 (m, 4H), 2.21-2.06 (m, 2H), 2.03-1.77 (m, 2H), 1.15 (t,  $J = 7.11$  Hz, 3H) ppm.

$^{13}\text{C}$  NMR (75 MHz,  $\text{CDCl}_3$ )  $\delta$  175.17, 158.34, 143.61, 136.67, 135.95, 135.37, 129.57, 129.08, 126.87, 122.96, 122.18, 111.97, 111.27, 64.19, 60.54, 55.38, 50.44, 40.77, 40.72, 38.36, 28.92, 21.47, 14.04 ppm.

HRMS ( $\text{Cl}^-$ ) calculated for  $\text{C}_{25}\text{H}_{30}\text{NO}_6\text{S}$  [ $\text{M} + \text{H}$ ] $^+$ : 472.1794, found: 472.1801.

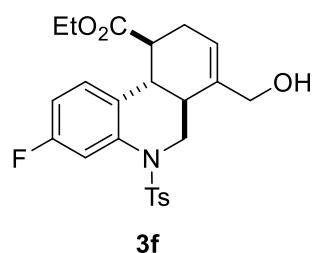

**Ethyl-3-fluoro-7-(hydroxymethyl)-5-tosyl-5, 6, 6a, 9, 10, 10a-hexahydrophenanthridine-10-carboxylate (3f)** was prepared according to the General Procedure C as a white solid, (chromatography eluent: petroleum ether/EtOAc = 3:1) in 80% yield (109.7 mg, *dr* > 20:1).

<sup>1</sup>H NMR (300 MHz, CDCl<sub>3</sub>) δ 7.55-7.45 (m, 3H), 7.22 (d, *J* = 5.07 Hz, 2H), 6.88-6.74 (m, 2H), 5.75 (d, *J* = 5.67 Hz, 1H), 4.18-3.98 (m, 5H), 3.39 (t, *J* = 12.15 Hz, 1H), 2.60 (td, *J*<sub>1</sub> = 11.46 Hz, *J*<sub>2</sub> = 5.28 Hz, 1H), 2.50-2.32 (m, 4H), 2.28-2.11 (m, 1H), 2.09-1.87 (m, 2H), 1.17 (t, *J* = 7.11 Hz, 3H) ppm.

<sup>13</sup>C NMR (75 MHz, CDCl<sub>3</sub>) δ 174.95, 161.29 (d, *J* = 242.75 Hz), 143.93, 137.15 (d, *J* = 10.81 Hz), 135.73, 135.24, 132.42 (d, *J* = 3.21 Hz), 129.71, 126.87, 123.35 (d, *J* = 9.18 Hz), 122.47, 113.56 (d, *J* = 25.11 Hz), 111.96 (d, *J* = 21.25 Hz), 64.27, 60.69, 50.42, 40.61, 40.48, 38.61, 28.85, 21.50, 14.04 ppm.

<sup>19</sup>F NMR (300 MHz, CDCl<sub>3</sub>) δ -114.39 ppm.

HRMS (CI<sup>+</sup>) calculated for C<sub>24</sub>H<sub>27</sub>FN<sub>2</sub>O<sub>5</sub>S [M + H]<sup>+</sup>: 460.1594, found: 460.1594.

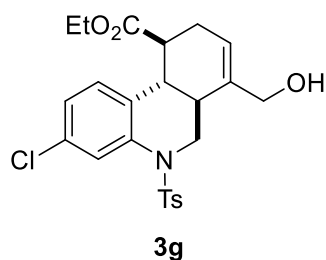

**Ethyl-3-chloro-7-(hydroxymethyl)-5-tosyl-5, 6, 6a, 9, 10, 10a-hexahydrophenanthridine-10-carboxylate (3g)** was prepared according to the General Procedure D as a yellow solid, (chromatography eluent: petroleum ether/EtOAc = 3:1) in 86% yield (122.9 mg, *dr* = 19:1).



$^1\text{H NMR}$  (300 MHz,  $\text{CDCl}_3$ )  $\delta$  7.75 (d,  $J = 2.10$  Hz, 1H), 7.48 (d,  $J = 8.31$  Hz, 2H), 7.22 (d,  $J = 7.98$  Hz, 2H), 7.06 (dd,  $J_1 = 8.28$  Hz,  $J_2 = 2.13$  Hz, 1H), 6.81 (dd,  $J_1 = 8.28$  Hz,  $J_2 = 0.72$  Hz, 1H), 5.74 (d,  $J = 5.67$  Hz, 1H), 4.17-3.97 (m, 5H), 3.39 (dd,  $J_1 = 12.18$  Hz,  $J_2 = 11.28$  Hz, 1H), 2.59 (td,  $J_1 = 11.43$  Hz,  $J_2 = 5.25$  Hz, 1H), 2.49-2.33 (m, 4H), 2.25-2.10 (m, 1H), 2.07-1.83 (m, 2H), 1.17 (t,  $J = 7.11$  Hz, 3H) ppm.

$^{13}\text{C NMR}$  (75 MHz,  $\text{CDCl}_3$ )  $\delta$  174.81, 143.95, 137.04, 135.74, 135.36, 135.20, 132.42, 129.73, 126.88, 126.27, 125.42, 123.47, 122.44, 64.25, 60.70, 50.38, 40.49, 40.45, 38.70, 28.81, 21.51, 14.05 ppm.

**HRMS** ( $\text{Cl}^-$ ) calculated for  $\text{C}_{24}\text{H}_{27}\text{ClNO}_5\text{S}$  [ $\text{M} + \text{H}$ ] $^+$ : 476.1298, found: 476.1300.

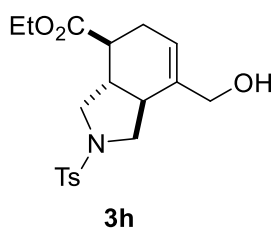

**Ethyl-7-(hydroxymethyl)-2-tosyl-2,3,4,5,7a-hexahydro-1H-isoindole-4-carboxylate (3h)** was prepared according to the General Procedure C as a white solid, (chromatography eluent: petroleum ether/EtOAc = 3:1) in 59% yield (65.7 mg,  $dr > 20:1$ ).

$^1\text{H NMR}$  (400 MHz,  $\text{CDCl}_3$ )  $\delta$  7.69 (d,  $J = 8.12$  Hz, 2H), 7.29 (d,  $J = 8.08$  Hz, 2H), 5.57 (s, 1H), 4.16-4.09 (m, 2H), 4.01-3.93 (m, 2H), 3.80 (dd,  $J_1 = 8.96$  Hz,  $J_2 = 6.96$  Hz, 1H), 3.65 (dd,  $J_1 = 9.56$  Hz,  $J_2 = 7.08$  Hz, 1H), 3.09-2.90 (m, 2H), 2.48-2.37 (m, 5H), 2.33-2.21 (m, 2H), 1.93-1.75 (m, 2H), 1.24 (t,  $J = 7.12$  Hz, 3H) ppm.

$^{13}\text{C NMR}$  (100 MHz,  $\text{CDCl}_3$ )  $\delta$  173.68, 143.37, 135.94, 134.45, 129.72, 127.15, 123.07, 64.63, 60.78, 50.89, 50.03, 43.49, 42.99, 42.23, 29.16, 21.45, 14.15 ppm.

**HRMS** ( $\text{Cl}^-$ ) calculated for  $\text{C}_{19}\text{H}_{26}\text{NO}_5\text{S}$  [ $\text{M} + \text{H}$ ] $^+$ : 380.1532, found: 380.1530.

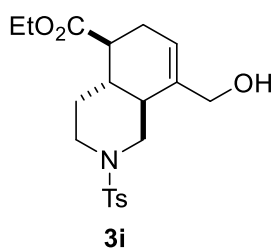

**Ethyl-8-(hydroxymethyl)-2-tosyl-1,2,3,4,5,6,8a-octahydroisoquinoline-5-carboxylate (3i)** was prepared according to the General Procedure C as a white solid, (chromatography eluent: petroleum ether/EtOAc = 3:1) in 85% yield (100.2 mg, *dr* > 20:1).

$^1\text{H NMR}$  (400 MHz,  $\text{CDCl}_3$ )  $\delta$  7.62 (d,  $J = 8.20$  Hz, 2H), 7.29 (d,  $J = 8.00$  Hz, 2H), 5.70 (s, 1H), 4.21-4.03 (m, 4H), 4.00 (d,  $J = 12.64$  Hz, 1H), 3.84 (d,  $J = 11.72$  Hz, 1H), 2.40 (s, 3H), 2.37-2.18 (m, 5H), 2.08 (s, 1H), 2.01 (t,  $J = 11.28$  Hz, 1H), 1.70-1.60 (m, 1H), 1.49-1.30 (m, 2H), 1.22 (t,  $J = 7.12$  Hz, 3H) ppm.

$^{13}\text{C NMR}$  (100 MHz,  $\text{CDCl}_3$ )  $\delta$  174.91, 143.49, 135.67, 133.01, 129.59, 127.53, 124.09, 64.09, 60.40, 48.87, 46.24, 44.55, 40.17, 40.10, 28.74, 28.69, 21.43, 14.18 ppm.

**HRMS** ( $\text{Cl}^+$ ) calculated for  $\text{C}_{20}\text{H}_{28}\text{NO}_5\text{S}$  [ $\text{M} + \text{H}$ ] $^+$ : 394.1688, found: 394.1692.

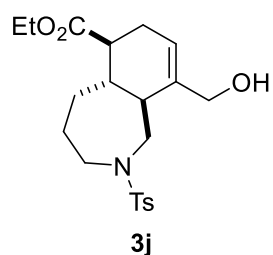

**Ethyl 9-(hydroxymethyl)-2-tosyl-2,3,4,5,5a,6,7,9a-octahydro-1H-benzo[c]azepine-6-carboxylate (3j)** was prepared according to the General Procedure C at 125 °C as a white solid, (chromatography eluent: petroleum ether/EtOAc = 3:1) in 16% yield (17.8 mg).

$^1\text{H NMR}$  (400 MHz,  $\text{CDCl}_3$ )  $\delta$  7.67 (d,  $J = 8.20$  Hz, 2H), 7.29 (d,  $J = 8.08$  Hz, 2H), 5.78 (d,  $J = 5.40$  Hz, 1H), 4.22-4.10 (m, 3H), 4.01 (d,  $J = 12.80$  Hz, 1H), 3.87 (dd,  $J_1 = 13.40$  Hz,  $J_2 = 3.96$  Hz, 1H), 3.40-3.21 (m, 2H), 2.78 (dd,  $J_1 = 13.36$  Hz,  $J_2 =$

10.56 Hz, 1H), 2.41 (s, 3H), 2.33-2.27 (m, 1H), 2.27-2.17 (m, 2H), 1.99-1.76 (m, 3H), 1.76-1.63 (m, 3H) 1.26 (t,  $J = 7.12$  Hz, 3H) ppm.

$^{13}\text{C}$  NMR (100 MHz,  $\text{CDCl}_3$ )  $\delta$  175.71, 143.16, 137.34, 136.33, 129.70, 126.87, 124.42, 65.04, 60.39, 50.58, 46.80, 46.76, 44.39, 41.46, 32.18, 28.97, 27.63, 21.47, 14.25 ppm.

HRMS ( $\text{Cl}^+$ ) calculated for  $\text{C}_{21}\text{H}_{30}\text{NO}_5\text{S}$  [ $\text{M} + \text{H}$ ] $^+$ : 408.1845, found: 408.1838.

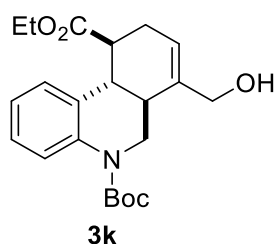

**5-tert-Butyl 10-ethyl 7-(hydroxymethyl)-6, 6a, 10, 10a-tetrahydrophenanthridine-5, 10 (9H)-dicarboxylate (3k)** was prepared according to the General Procedure C as a white solid, (chromatography eluent: petroleum ether/EtOAc = 3:1) in 84% yield (98.0 mg,  $dr > 20:1$ ).

$^1\text{H}$  NMR (300 MHz,  $\text{CDCl}_3$ )  $\delta$  7.52 (s, 1H), 7.23-7.10 (m, 1H), 6.99 (d,  $J = 4.17$  Hz, 2H), 5.82 (d,  $J = 5.61$  Hz, 1H), 4.34-4.00 (m, 4H), 3.84 (dd,  $J_1 = 11.34$  Hz,  $J_2 = 6.93$  Hz, 1H), 3.48 (t,  $J = 12.24$  Hz, 1H), 2.93-2.74 (m, 2H), 2.63-2.49 (m, 1H), 2.41-2.10 (m, 2H), 1.80 (s, 1H), 1.51 (s, 9H), 1.28 (t,  $J = 7.11$  Hz, 3H) ppm.

$^{13}\text{C}$  NMR (75 MHz,  $\text{CDCl}_3$ )  $\delta$  175.89, 154.02, 137.38, 136.70, 135.15, 126.16, 124.56, 123.56, 121.96, 121.73, 80.95, 64.33, 60.86, 49.18, 40.76, 39.80, 39.37, 29.17, 28.33, 14.12 ppm.

HRMS ( $\text{Cl}^+$ ) calculated for  $\text{C}_{22}\text{H}_{30}\text{NO}_5$  [ $\text{M} + \text{H}$ ] $^+$ : 388.2124, found: 388.2124.

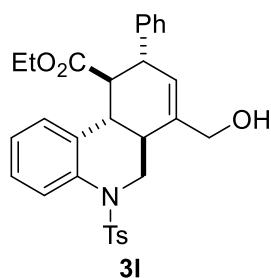

**Ethyl (6a, 9, 10, 10a)-7-(hydroxymethyl)-9-phenyl-5-tosyl-5,6,6a,9,10,10a-hexahydrophenanthridine-10-carboxylate (3l)** was prepared according to the General Procedure C as a white solid (chromatography eluent: petroleum ether/EtOAc = 3:1) in 88% yield (136.6 mg, *dr* > 20:1).

<sup>1</sup>H NMR (400 MHz, CDCl<sub>3</sub>) δ 7.78 (d, *J* = 7.52 Hz, 1H), 7.42 (d, *J* = 8.20 Hz, 2H), 7.25-7.05 (m, 7H), 6.80 (d, *J* = 7.16 Hz, 2H), 6.72 (d, *J* = 7.68 Hz, 1H), 5.79 (d, *J* = 4.40 Hz, 1H), 4.26-4.10 (m, 3H), 3.92-3.86 (m, 1H), 3.74-3.64 (m, 1H), 3.62-3.47 (m, 2H), 3.01 (dd, *J*<sub>1</sub> = 12.44 Hz, *J*<sub>2</sub> = 6.44 Hz, 2H), 2.31-2.19 (m, 4H), 2.06 (t, *J* = 11.80 Hz, 1H), 0.72 (t, *J* = 7.16 Hz, 3H) ppm.

<sup>13</sup>C NMR(100 MHz, CDCl<sub>3</sub>) δ 172.67, 143.23, 138.77, 137.71, 136.38, 135.66, 135.37, 129.58, 129.18, 128.00, 127.12, 126.90, 126.87, 126.74, 125.59, 124.96, 122.44, 64.33, 60.03, 50.53, 46.05, 43.15, 40.83, 34.22, 21.51, 13.50 ppm.

**HRMS** (CI<sup>+</sup>) calculated for C<sub>30</sub>H<sub>32</sub>NO<sub>5</sub>S [M + H]<sup>+</sup>: 518.2001, found: 518.2010 .

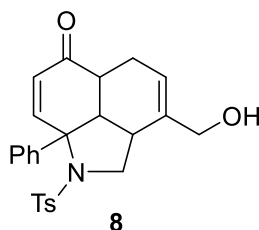

**3-(Hydroxymethyl)-8a-phenyl-1-tosyl-2,2a,2a',5,5a,8a-hexahydrobenzo[cd]indol-6(1H)-one (8)** was prepared according to the General Procedure C as a white solid (chromatography eluent: petroleum ether/EtOAc = 2:1) in 52% yield (67.7 mg, *dr* = 6.3:1).

*Major diastereomer*

<sup>1</sup>H NMR (300 MHz, CDCl<sub>3</sub>) δ 7.61 (dd, *J*<sub>1</sub> = 10.44 Hz, *J*<sub>2</sub> = 2.32 Hz, 1H), 7.39 (d, *J* = 8.20 Hz, 2H), 7.32-7.22 (m, 5H), 7.18 (d, *J* = 8.12 Hz, 2H), 6.16 (d, *J* = 10.44 Hz, 1H), 5.55(d, *J* = 2.44 Hz, 1H), 4.19 (dd, *J*<sub>1</sub> = 8.60 Hz, *J*<sub>2</sub> = 6.88 Hz, 1H), 4.00 (s, 2H), 3.45 (dd, *J*<sub>1</sub> = 11.36 Hz, *J*<sub>2</sub> = 8.80 Hz, 1H), 3.00 (d, *J* = 19.28 Hz, 1H), 2.85-2.72 (m, 1H), 2.66-2.54 (m, 2H), 2.40 (s, 3H), 2.10-1.96 (m,1H), 1.83-1.62 (m,

1H) ppm.

<sup>13</sup>C NMR (300 MHz, CDCl<sub>3</sub>) δ 197.53, 147.94, 143.11, 140.40, 137.42, 135.53, 129.33, 128.43, 127.92, 127.63, 126.95, 126.30, 124.35, 69.87, 65.05, 56.05, 51.98, 39.26, 37.79, 23.47, 21.44 ppm.

*Minor diastereomer*

<sup>1</sup>H NMR (300 MHz, CDCl<sub>3</sub>) δ 7.70 (d, *J* = 8.20 Hz, 2H), 7.47-7.36 (m, 5H), 7.32-7.22 (m, 4H), 6.20 (d, *J* = 10.36 Hz, 1H), 5.67 (d, *J* = 5.04 Hz, 1H), 4.25 (t, *J* = 9.16 Hz, 1H), 3.92 (s, 2H), 3.28 (t, *J* = 9.80 Hz, 1H), 2.85-2.72 (m, 1H), 2.54-2.48 (m, 1H), 2.40 (s, 3H), 2.10-1.96 (m, 2H), 1.83-1.62 (m, 1H) ppm.

<sup>13</sup>C NMR (300 MHz, CDCl<sub>3</sub>) δ 199.23, 146.29, 143.67, 143.59, 136.39, 136.21, 129.51, 129.20, 128.64, 127.81, 126.99, 126.07, 123.20, 70.38, 66.13, 54.66, 54.49, 39.81, 34.87, 23.59, 21.49 ppm.

HRMS (CI<sup>+</sup>) calculated for C<sub>25</sub>H<sub>26</sub>NO<sub>4</sub>S [M + H]<sup>+</sup>: 436.1583, found: 436.1580.

#### General Procedure D:

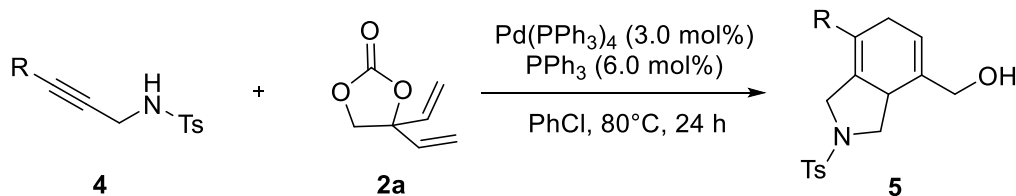

Under N<sub>2</sub>, to a solution of propynyl-*p*-toluenesulfonamide derivatives **4** (0.30 mmol, 1.0 equiv.) and divinyldioxolanone **2a** (0.45 mmol, 1.5 equiv.) in PhCl (3.0 mL) was added Pd(PPh<sub>3</sub>)<sub>4</sub> (10.5 mg, 9.0 × 10<sup>-3</sup> mmol, 3.0 mol%) and PPh<sub>3</sub> (4.6 mg, 1.8 × 10<sup>-2</sup> mmol, 6.0 mol%). The reaction mixture was stirred at 80 °C for 24 h. The reaction mixture was concentrated under reduced pressure, then the residue was directly purified by silica gel column chromatography (eluent: petroleum ether/EtOAc) to afford the desired product **5**.

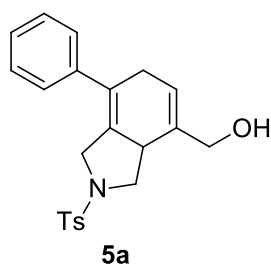

**(7-Phenyl-2-tosyl-2,3,6-tetrahydro-1H-isoindol-4-yl)methanol (5a)** was prepared according to the General Procedure D as a colourless solid (chromatography eluent: petroleum ether/EtOAc = 3:1) in 83% yield (95.5 mg).  $^1\text{H NMR}$  (300 MHz,  $\text{CDCl}_3$ )  $\delta$  7.64 (d,  $J = 8.12$  Hz, 2H), 7.38-7.21 (m, 5H), 7.10 (d,  $J = 7.08$  Hz, 2H), 5.83 (s, 1H), 4.15 (d,  $J = 14.00$  Hz, 1H), 4.09 (s, 2H), 3.99 (t,  $J = 8.32$  Hz, 1H), 3.68 (d,  $J = 13.76$  Hz, 1H), 3.37-3.23 (m, 1H), 3.19-3.05 (m, 1H), 3.00-2.86 (m, 1H), 2.77 (dd,  $J_1 = 11.08$  Hz,  $J_2 = 9.08$  Hz, 1H), 2.39 (s, 3H) ppm.  $^{13}\text{C NMR}$  (75 MHz,  $\text{CDCl}_3$ )  $\delta$  143.38, 139.64, 134.07, 133.70, 130.24, 129.63, 129.34, 128.30, 127.45, 127.30, 127.22, 122.47, 65.04, 51.31, 49.64, 40.37, 32.12, 21.39 ppm.

**HRMS** ( $\text{Cl}^-$ ) calculated for  $\text{C}_{22}\text{H}_{24}\text{NO}_3\text{S}$  [ $\text{M} + \text{H}$ ] $^+$ : 382.1477, found: 382.1469.

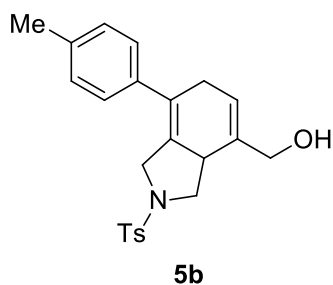

**(7-(*p*-Tolyl)-2-tosyl-2,3,6-tetrahydro-1H-isoindol-4-yl)methanol (5b)** was prepared according to the General Procedure D as a colourless solid, (chromatography eluent: petroleum ether/EtOAc = 3:1) in 95% yield (112.2 mg).

$^1\text{H NMR}$  (300 MHz,  $\text{CDCl}_3$ )  $\delta$  7.64 (d,  $J = 8.25$  Hz, 2H), 7.25 (d,  $J = 7.95$  Hz, 2H), 7.13 (d,  $J = 7.89$  Hz, 2H), 6.99 (d,  $J = 8.10$  Hz, 2H), 5.81 (s, 1H), 4.16 (dt,  $J_1 = 3.80$  Hz,  $J_2 = 1.41$  Hz, 1H), 4.08 (s, 2H), 3.99 (dd,  $J_1 = 8.76$  Hz,  $J_2 = 7.71$  Hz, 1H), 3.69

(d,  $J = 13.77$  Hz, 1H), 3.38-3.20 (m, 1H), 3.19-3.03 (m, 1H), 2.97-2.81 (m, 1H), 2.76 (dd,  $J_1 = 11.25$  Hz,  $J_2 = 8.91$  Hz, 1H), 2.38 (s, 3H), 2.35 (s, 3H) ppm.

$^{13}\text{C}$  NMR (75 MHz,  $\text{CDCl}_3$ )  $\delta$  143.32, 137.20, 136.65, 134.10, 133.78, 129.73, 129.61, 129.15, 128.96, 127.31, 127.10, 122.51, 65.06, 51.27, 49.71, 40.40, 32.10, 21.39, 21.05 ppm.

HRMS ( $\text{Cl}^-$ ) calculated for  $\text{C}_{23}\text{H}_{26}\text{NO}_3\text{S}$  [ $\text{M} + \text{H}$ ] $^+$ : 396.1633, found: 396.1631.

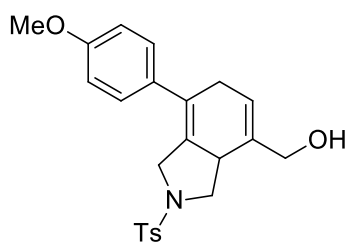

**5c**

(7-(4-Methoxyphenyl)-2-tosyl-2,3,6-tetrahydro-1H-isoindol-4-yl)methanol (**5c**) was prepared according to the General Procedure D as a white solid, (chromatography eluent: petroleum ether/EtOAc = 3:1) in 96% yield (117.9 mg).

$^1\text{H}$  NMR (300 MHz,  $\text{CDCl}_3$ )  $\delta$  7.69 (d,  $J = 8.25$  Hz, 2H), 7.29 (d,  $J = 8.04$  Hz, 2H), 7.08 (d,  $J = 8.73$  Hz, 2H), 6.91 (d,  $J = 8.76$  Hz, 2H), 5.86 (s, 1H), 4.21 (dt,  $J_1 = 13.77$  Hz,  $J_2 = 1.38$  Hz, 1H), 4.13 (s, 2H), 4.03 (dd,  $J_1 = 8.67$  Hz,  $J_2 = 7.77$  Hz, 1H), 3.86 (s, 3H), 3.73 (d,  $J = 13.68$  Hz, 1H), 3.43-3.25 (m, 1H), 3.23-3.07 (m, 1H), 3.02-2.85 (m, 1H), 2.79 (dd,  $J_1 = 11.22$  Hz,  $J_2 = 8.88$  Hz, 1H), 2.43 (s, 3H) ppm.

$^{13}\text{C}$  NMR (75 MHz,  $\text{CDCl}_3$ )  $\delta$  158.84, 143.36, 134.16, 133.86, 131.94, 129.65, 129.36, 128.79, 128.43, 127.36, 122.62, 113.68, 65.20, 55.23, 51.29, 49.79, 40.47, 32.11, 21.44 ppm.

HRMS ( $\text{Cl}^-$ ) calculated for  $\text{C}_{23}\text{H}_{26}\text{NO}_4\text{S}$  [ $\text{M} + \text{H}$ ] $^+$ : 412.1583, found: 412.1578.

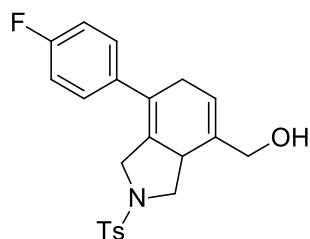

**5d**

(7-(4-Fluorophenyl)-2-tosyl-2,3,3a,6-tetrahydro-1H-isoindol-4-yl)methanol (**5d**) was prepared according to the General Procedure D as a white solid, (chromatography eluent: petroleum ether/EtOAc = 3:1) in 86% yield (102.3 mg).

<sup>1</sup>H NMR (300 MHz, CDCl<sub>3</sub>) δ 7.64 (d, *J* = 8.25 Hz, 2H), 7.26 (d, *J* = 7.98 Hz, 2H), 7.10-6.95 (m, 4H), 5.81 (s, 1H), 4.17-4.05 (m, 3H), 3.99 (t, *J* = 8.76 Hz, 1H), 3.62 (d, *J* = 13.74 Hz, 1H), 3.38-3.20 (m, 1H), 3.18-2.68 (m, 3H), 2.39 (s, 3H), 1.89 (s, 1H) ppm.

<sup>13</sup>C NMR (75 MHz, CDCl<sub>3</sub>) δ 163.95 (d, *J* = 245.25 Hz), 143.49, 135.63 (d, *J* = 3.75 Hz), 134.13, 133.69, 130.58, 129.68, 128.93 (d, *J* = 8.25 Hz), 128.43, 127.35, 122.43, 115.28 (d, *J* = 21.0 Hz), 65.10, 51.29, 49.58, 40.43, 32.29, 21.44 ppm.

<sup>19</sup>F NMR (300 MHz, CDCl<sub>3</sub>) δ -114.17 ppm.

HRMS (CI<sup>+</sup>) calculated for C<sub>22</sub>H<sub>23</sub>FN<sub>3</sub>O<sub>3</sub>S [M + H]<sup>+</sup>: 400.1383, found: 400.1376.

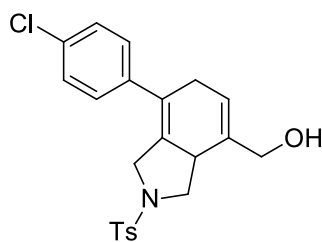

**5e**

(7-(4-Chlorophenyl)-2-tosyl-2,3,3a,6-tetrahydro-1H-isoindol-4-yl)methanol (**5e**) was prepared according to the General Procedure D as a yellow solid, (chromatography eluent: petroleum ether/EtOAc = 3:1) in 90% yield (112.0 mg).



$^1\text{H NMR}$  (300 MHz, acetone- $d_6$ )  $\delta$  7.66 (d,  $J$  = 8.10 Hz, 2H), 7.38 (t,  $J$  = 8.16 Hz, 4H), 7.24 (d,  $J$  = 8.40 Hz, 2H), 5.78, (s, 1H), 4.21 (d,  $J$  = 13.95 Hz, 1H), 4.14-3.88 (m, 4H), 3.60 (d,  $J$  = 13.95 Hz, 1H), 3.39-3.05 (m, 2H), 2.98-2.85 (m, 2H), 2.39 (s, 3H) ppm.

$^{13}\text{C NMR}$  (75 MHz, acetone- $d_6$ )  $\delta$  144.14, 139.33, 135.74, 134.67, 133.29, 132.23, 130.31, 129.73, 129.03, 128.70, 128.07, 121.27, 64.69, 52.05, 50.12, 41.04, 32.20, 21.11 ppm.

HRMS ( $\text{Cl}^+$ ) calculated for  $\text{C}_{22}\text{H}_{23}\text{ClNO}_3\text{S}$  [ $\text{M} + \text{H}$ ] $^+$ : 416.1087, found: 416.1082.

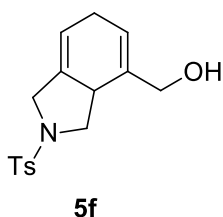

(2-Tosyl-2,3,6-tetrahydro-1H-isoindol-4-yl)methanol (**5f**) was prepared according to the General Procedure D as a yellow solid (chromatography eluent: petroleum ether/EtOAc = 3:1) in 76% yield (69.6 mg).

$^1\text{H NMR}$  (400 MHz, acetone- $d_6$ )  $\delta$  7.82 (d,  $J$  = 8.20 Hz, 2H), 7.50 (d,  $J$  = 8.04 Hz, 2H), 5.75 (s, 1H), 5.67 (s, 1H), 4.17-4.00 (m, 4H), 3.95 (t,  $J$  = 5.52 Hz, 1H), 3.81 (d,  $J$  = 13.32 Hz, 1H), 3.18-3.07 (m, 1H), 2.80 (dd,  $J_1$  = 11.16 Hz,  $J_2$  = 9.20 Hz, 1H), 2.76-2.68 (m, 2H), 2.49 (s, 3H) ppm.

$^{13}\text{C NMR}$  (100 MHz, acetone- $d_6$ )  $\delta$  144.12, 136.04, 135.70, 134.62, 130.32, 128.17, 121.38, 117.45, 64.96, 52.80, 50.89, 39.25, 27.60, 21.15 ppm.

HRMS ( $\text{Cl}^+$ ) calculated for  $\text{C}_{16}\text{H}_{20}\text{NO}_3\text{S}$  [ $\text{M} + \text{H}$ ] $^+$ : 306.1164, found: 306.1163.

### General Procedure E:

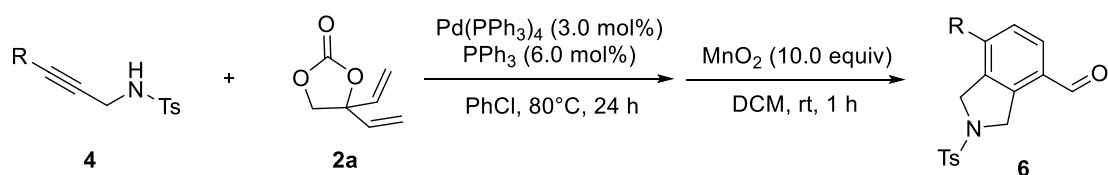

Under  $\text{N}_2$ , to a solution of propynyl-*p*-toluenesulfonamide derivatives **4** (0.30 mmol, 1.0 equiv.) and divinyl-dioxolanone **2a** (0.45 mmol, 1.5 equiv.) in

PhCl (3.0 mL) was added Pd(PPh<sub>3</sub>)<sub>4</sub> (10.5 mg, 9.0 × 10<sup>-3</sup> mmol, 3.0 mol%) and PPh<sub>3</sub> (4.6 mg, 1.8 × 10<sup>-2</sup> mmol, 6.0 mol%). The reaction mixture was stirred at 80 °C for 24 h. The reaction mixture was evaporated under pressure, the residue was dissolved in DCM (5.0 mL) followed by the addition of MnO<sub>2</sub> (261 mg, 3.0 mmol, 10.0 equiv). The resulting reaction mixture was stirred at room temperature for another 1 h before it was filtered through a pad of Celite rinsing with DCM. The filtrate was concentrated under reduced pressure and purified by silica gel column chromatography (eluent: petroleum ether/EtOAc) to afford the desired product **6**.

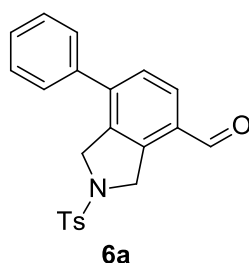

**7-Phenyl-2-tosylisoindoline-4-carbaldehyde (6a)** was prepared according to the General Procedure E as a white solid (chromatography eluent: petroleum ether/EtOAc = 3:1) in 76% yield (86.4 mg).

<sup>1</sup>H NMR (400 MHz, CDCl<sub>3</sub>) δ 10.03 (s, 1H), 7.77 (d, *J* = 7.84 Hz, 2H), 7.53-7.40 (m, 4H), 7.39-7.27 (m, 4H) 4.97 (s, 2H), 4.65 (s, 2H), 2.39 (s, 3H) ppm.

<sup>13</sup>C NMR (100 MHz, CDCl<sub>3</sub>) δ 191.57, 143.71, 142.79, 138.29, 137.87, 136.08, 133.50, 132.97, 129.86, 129.82, 128.91, 128.88, 128.61, 127.82, 127.55, 54.20, 52.58, 21.45 ppm.

HRMS (CI<sup>+</sup>) calculated for C<sub>22</sub>H<sub>20</sub>NO<sub>3</sub>S [M + H]<sup>+</sup>: 378.1164, found: 378.1162.

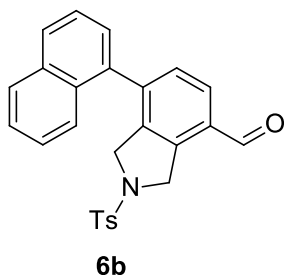

**7-(Naphthalen-1-yl)-2-tosylisoindoline-4-carbaldehyde (6b)** was prepared according to the General Procedure E as a yellow solid (chromatography eluent: petroleum ether/EtOAc = 3:1) in 37% yield (48.1 mg).

$^1\text{H NMR}$  (300 MHz,  $\text{CDCl}_3$ )  $\delta$  10.10 (s, 1H), 7.95 (d,  $J = 8.22$  Hz, 2H), 7.84 (d,  $J = 7.68$  Hz, 1H), 7.68 (d,  $J = 8.22$  Hz, 2H), 7.58-7.50 (m, 2H), 7.49-7.23 (m, 6H), 5.12-4.95 (m, 2H), 4.41-4.22 (m, 2H), 2.40 (s, 3H) ppm.

$^{13}\text{C NMR}$  (100 MHz,  $\text{CDCl}_3$ )  $\delta$  191.65, 143.65, 141.78, 137.94, 137.42, 135.86, 133.62, 133.53, 132.63, 130.34, 130.25, 129.78 (2C), 129.01, 128.66, 127.54, 126.72, 126.30, 126.10, 125.28, 124.85, 54.55, 52.49, 21.47 ppm.

**HRMS** ( $\text{Cl}^+$ ) calculated for  $\text{C}_{26}\text{H}_{22}\text{NO}_3\text{S}$  [ $\text{M} + \text{H}$ ] $^+$ : 428.1320, found: 428.1313.

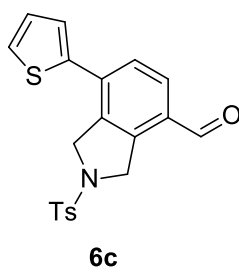

**7-(Thiophen-2-yl)-2-tosylisoindoline-4-carbaldehyde (6c)** was prepared according to the General Procedure E as a yellow solid (chromatography eluent: petroleum ether/EtOAc = 3:1) in 26% yield (30.0 mg).

$^1\text{H NMR}$  (300 MHz,  $\text{CDCl}_3$ )  $\delta$  9.99 (s, 1H), 7.81 (d,  $J = 8.19$  Hz, 2H), 7.69 (q,  $J = 7.98$  Hz, 2H), 7.48 (d,  $J = 5.04$  Hz, 1H), 7.35-7.26 (m, 3H), 7.17 (dd,  $J_1 = 4.98$  Hz,  $J_2 = 3.81$  Hz, 1H), 4.97 (s, 2H), 4.83 (s, 2H), 2.39 (s, 3H) ppm.

$^{13}\text{C}$  NMR (75 MHz,  $\text{CDCl}_3$ )  $\delta$  191.16, 143.79, 140.13, 138.65, 135.04, 134.62, 133.63, 132.91, 129.90, 129.52, 128.38, 127.71, 127.58, 127.36, 127.10, 54.11, 53.46, 21.49 ppm.

HRMS ( $\text{CI}^+$ ) calculated for  $\text{C}_{20}\text{H}_{18}\text{NO}_3\text{S}_2$  [ $\text{M} + \text{H}$ ] $^+$ : 384.0728, found: 384.0728.

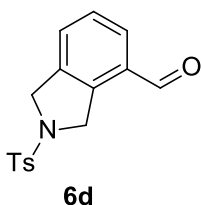

**2-Tosylisoindoline-4-carbaldehyde (6d)** was prepared according to the General Procedure E as a white solid (chromatography eluent: petroleum ether/EtOAc = 3:1) in 53% yield (48.1 mg).

$^1\text{H}$  NMR (400 MHz,  $\text{CDCl}_3$ )  $\delta$  9.99 (s, 1H), 7.77 (d,  $J$  = 8.08 Hz, 2H), 7.69 (d,  $J$  = 7.20 Hz, 1H), 7.50-7.40 (m, 2H), 7.30 (d,  $J$  = 8.08 Hz, 2H), 4.90 (s, 2H), 4.62 (s, 2H), 2.38 (s, 3H) ppm.

$^{13}\text{C}$  NMR (100 MHz,  $\text{CDCl}_3$ )  $\delta$  191.89, 143.69, 138.07, 136.85, 133.48, 132.30, 131.18, 129.78, 128.49, 127.96, 127.49, 54.08, 52.60, 21.41 ppm.

HRMS ( $\text{CI}^+$ ) calculated for  $\text{C}_{16}\text{H}_{16}\text{NO}_3\text{S}$  [ $\text{M} + \text{H}$ ] $^+$ : 302.0851, found: 302.0850.

#### IV. Synthetic Transformation of Hydrophenanthridines

##### Scale-up reaction

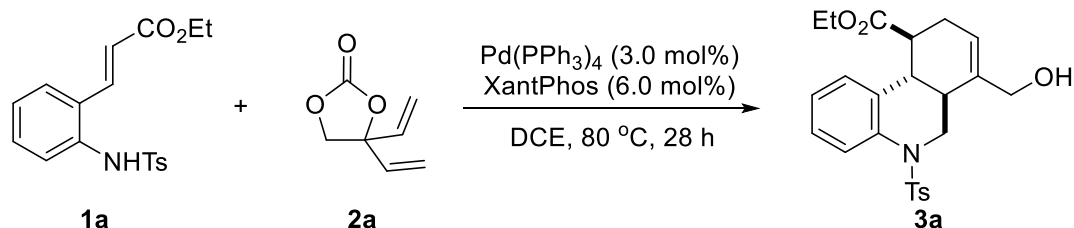

Under N<sub>2</sub>, to a solution of ethyl (*E*)-3-(2-((4-methylphenyl)sulfonamido)phenyl)-acrylate **1a** (933.3 mg, 2.7 mmol, 1.0 equiv.) and 4,4-divinyl-1,3-dioxolan-2-one **2a** (550.8 mg, 4.05 mmol, 1.5 equiv.) in DCE (27.0 mL) was added Pd(PPh<sub>3</sub>)<sub>4</sub> (93.6 mg, 0.08 mmol, 3.0 mol%) and XantPhos (94.5 mg, 0.16 mmol, 6.0 mol%). The reaction mixture was stirred at 80 °C for 28 h. The reaction mixture was concentrated under reduced pressure, then the residue was directly purified by silica gel column chromatography (eluent: petroleum ether/EtOAc = 3:1) to afford the desired product **3a** in 89% yield (1.05 g).

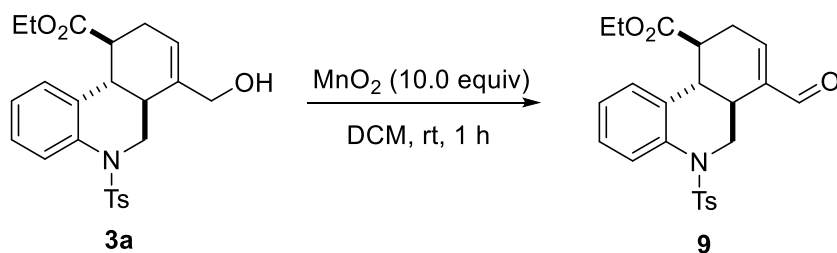

**Ethyl-7-formyl-5-tosyl-5, 6, 6a, 9, 10, 10a-hexahydrophenanthridine-10-carboxylate (9)**: Under air at room temperature, to a solution of hydrophenanthridine product **3a** (66.1 mg, 0.15 mmol) in DCM (2.0 mL) was added MnO<sub>2</sub> (130.4 mg, 1.5 mmol, 10.0 equiv). The reaction mixture was stirred at room temperature for 1 h before it was filtered through a pad of Celite rinsing with DCM. The filtrate was concentrated under reduced pressure, then the residue was purified by silica gel column chromatography

(eluent: petroleum ether/EtOAc = 3:1) to afford the desired product **9** as a colourless solid in 88% yield (57.9 mg).

<sup>1</sup>H NMR (400 MHz, CDCl<sub>3</sub>) δ 9.42 (s, 1H), 7.70 (d, *J* = 8.04 Hz, 1H), 7.51 (d, *J* = 8.08 Hz, 2H), 7.31-7.21 (m, 3H), 7.13 (t, *J* = 7.60 Hz, 1H), 6.95 (d, *J* = 7.64 Hz, 1H), 6.87 (d, *J* = 5.76 Hz, 1H), 4.45 (dd, *J*<sub>1</sub> = 11.64 Hz, *J*<sub>2</sub> = 7.12 Hz, 1H), 4.21-4.12 (m, 2H), 3.35 (t, *J* = 11.60 Hz, 1H), 2.82-2.63 (m, 2H), 2.41 (s, 3H), 2.38-2.26 (m, 2H), 2.03 (t, *J* = 11.08 Hz, 1H), 1.22 (td, *J*<sub>1</sub> = 7.04 Hz, *J*<sub>2</sub> = 0.56 Hz, 3H) ppm.

<sup>13</sup>C NMR (100 MHz, CDCl<sub>3</sub>) δ 192.30, 174.07, 148.50, 143.54, 141.19, 136.27, 136.19, 136.05, 129.65, 127.29, 126.85, 126.55, 125.65, 122.25, 60.95, 49.77, 39.89, 39.21, 38.54, 30.35, 21.49, 14.06 ppm.

HRMS (CI<sup>+</sup>) calculated for C<sub>24</sub>H<sub>26</sub>NO<sub>5</sub>S [M + H]<sup>+</sup>: 440.1532, found: 440.1534.

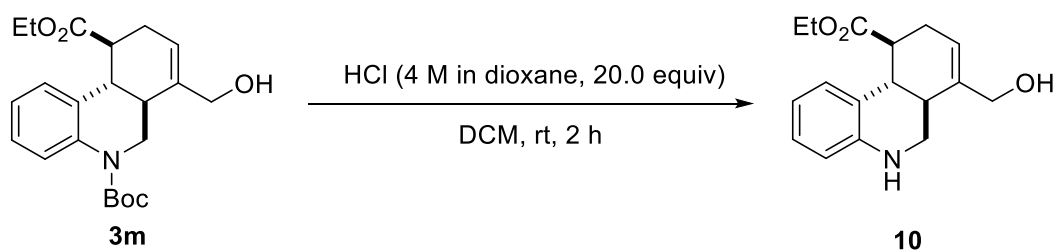

**Ethyl-7-(hydroxymethyl)-5,6,9,10,10a-hexahydrophenanthridine-10-carboxylate (10)** : Under air at room temperature, to a solution of hydrophenanthridine product **3m** (58.1 mg, 0.15 mmol) in DCM (2.0 mL) was added HCl (0.75 mL, 4.0 M in dioxane). The reaction mixture was stirred at room temperature for 2 hour. The reaction mixture was concentrated under reduced pressure, then the residue was directly purified by silica gel column chromatography (eluent: petroleum ether/EtOAc = 3:1) to afford the desired product **10** as a colourless solid in 73% yield (41.9 mg).

<sup>1</sup>H NMR (300 MHz, CDCl<sub>3</sub>) δ 6.99 (t, *J* = 7.50 Hz, 1H), 6.86 (d, *J* = 7.65 Hz, 1H), 6.57 (t, *J* = 7.41 Hz, 1H), 6.47 (d, *J* = 7.86 Hz, 1H), 5.83 (d, *J* = 5.37 Hz, 1H), 4.34-3.98 (m, 4H), 3.76 (dd, *J*<sub>1</sub> = 10.35 Hz, *J*<sub>2</sub> = 5.10 Hz, 1H), 3.12 (t, *J* = 11.85 Hz,

1H), 3.01 (t,  $J = 11.19$  Hz, 1H), 2.86-2.73 (m, 1H), 2.65-2.48 (m, 1H), 2.43-2.25 (m, 2H), 1.29 (t,  $J = 7.14$  Hz, 3H) ppm.

$^{13}\text{C}$  NMR (75 MHz,  $\text{CDCl}_3$ )  $\delta$  176.70, 144.35, 136.76, 127.15, 124.58, 123.67, 122.69, 116.31, 113.06, 64.76, 60.79, 46.38, 41.63, 39.67, 35.96, 29.67, 14.08 ppm.

HRMS ( $\text{Cl}^+$ ) calculated for  $\text{C}_{17}\text{H}_{22}\text{NO}_3$   $[\text{M} + \text{H}]^+$ : 288.1600, found: 288.1607.

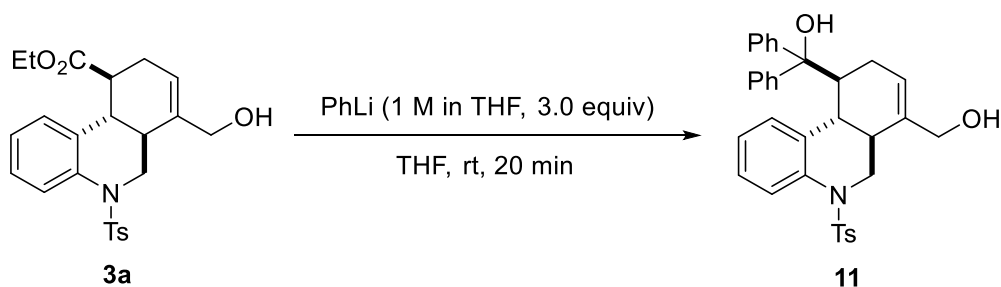

**(7-(Hydroxymethyl)-5-tosyl-5, 6, 6a, 9, 10, 10a-hexahydrophenanthridin-10-yl)diphenylmethanol (11)**: Under  $\text{N}_2$  at  $0\text{ }^\circ\text{C}$ , to a solution of hydrophenanthridine product **3a** (66.1 mg, 0.15 mmol) in THF (2.0 mL) was added PhLi (0.45 mL, 1 M in THF) dropwise. The reaction mixture was stirred at room temperature for 2 h. The reaction mixture was quenched by aq.  $\text{NH}_4\text{Cl}$  (5.0 mL) and extracted with ethyl acetate ( $5.0 \times 3$  mL). The combined organic layers were washed with water (10.0 mL), brine (10.0 mL), dried over  $\text{Na}_2\text{SO}_4$  and concentrated under reduced pressure. The residue was purified by silica gel column chromatography (eluent: petroleum ether/EtOAc = 3:1) to afford the desired product **11** as a white solid in 62% yield (51.7 mg).

$^1\text{H}$  NMR (300 MHz,  $\text{CDCl}_3$ )  $\delta$  7.79 (dd,  $J_1 = 8.00$  Hz,  $J_2 = 1.04$  Hz, 1H), 7.45-7.36 (m, 3H), 7.28-7.11 (m, 12H), 7.00 (d,  $J = 8.08$  Hz, 2H), 5.65 (t,  $J = 3.40$  Hz, 1H), 4.11 (q,  $J = 5.84$  Hz, 1H), 3.94 (q,  $J = 12.56$  Hz, 2H), 3.83-3.72 (m, 2H), 2.36-2.25 (m, 5H), 2.20 (s, 1H), 2.13-2.02 (m, 1H), 1.98-1.87 (m, 1H) ppm.

$^{13}\text{C}$  NMR (100 MHz,  $\text{CDCl}_3$ )  $\delta$  146.57, 146.20, 143.26, 139.27, 137.27, 136.27, 135.74, 129.43, 128.05, 127.86, 127.25, 127.10, 126.89, 126.84, 126.75, 126.70, 126.62, 126.00, 124.82, 123.80, 82.00, 63.52, 48.19, 41.21, 40.42, 39.39, 25.36, 21.56 ppm.

HRMS (CI<sup>+</sup>) calculated for C<sub>34</sub>H<sub>34</sub>NO<sub>4</sub>S [M + H]<sup>+</sup>: 552.2209, found: 552.2207.

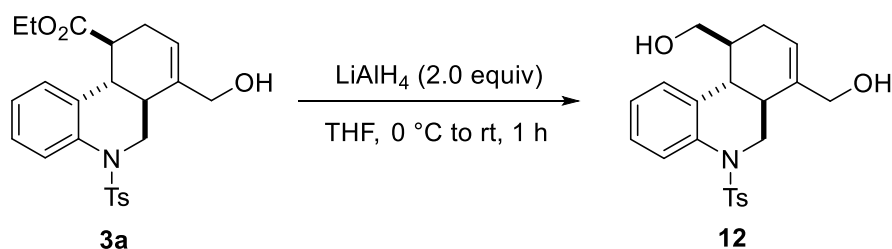

**(5-Tosyl-5, 6, 6a, 9, 10, 10a-hexahydrophenanthridine -7, 10-diyl)dimethanol**

**(12):** Under N<sub>2</sub> at 0 °C, to a solution of hydrophenanthridine product **3a** (66.1 mg, 0.15 mmol) in THF (2.0 mL), was added LiAlH<sub>4</sub> (11.4 mg, 0.3mmol, 2.0 equiv). The reaction mixture was stirred at room temperature for 1 h. The reaction mixture was quenched by aq. NH<sub>4</sub>Cl (5.0mL) and extracted with ethyl acetate (5.0 × 3 mL). The combined organic layers were washed with water (10.0 mL), brine (10.0 mL), dried over Na<sub>2</sub>SO<sub>4</sub> and concentrated under reduced pressure. The residue was purified by silica gel column chromatography (chromatography eluent: petroleum ether/EtOAc = 1:1) to afford the desired product **12** as a white solid in 53% yield (31.7 mg).

<sup>1</sup>H NMR (400 MHz, CDCl<sub>3</sub>) δ 7.79 (d, *J* = 7.88 Hz, 1H), 7.43 (d, *J* = 8.08 Hz, 2H), 7.31-7.24 (m, 1H), 7.23-7.12 (m, 4H), 5.75 (d, *J* = 4.12 Hz, 1H), 4.13-3.90 (m, 3H), 3.85 (d, *J* = 10.84 Hz, 1H), 3.45 (t, *J* = 11.76 Hz, 1H), 3.21 (dd, *J*<sub>1</sub> = 10.96 Hz, *J*<sub>2</sub> = 6.84 Hz, 1H), 2.48-2.30 (m, 4H), 2.18-1.94 (m, 2H), 1.87-1.20 (m, 4H) ppm.

<sup>13</sup>C NMR (100 MHz, CDCl<sub>3</sub>) δ 143.63, 138.75, 136.46, 135.82, 135.21, 129.37, 27.93, 126.96 (2C), 126.05, 123.74, 122.76, 65.81, 64.85, 50.89, 42.43, 37.80, 33.80, 28.00, 21.47 ppm.

HRMS (CI<sup>+</sup>) calculated for C<sub>22</sub>H<sub>26</sub>NO<sub>4</sub>S [M + H]<sup>+</sup>: 400.1583, found: 400.1585.



## V. Determination of Product Structure

The absolute stereochemistry of product **3a** was determined by X-ray diffraction. The X-ray data have been deposited at the Cambridge Crystallographic Data Center (CCDC 2191161). The data can be obtained free of charge via the internet at <https://www.ccdc.cam.ac.uk/structures/>. The measurements were taken in a Bruker D8 Venture CCD diffractometer. The data were integrated by Bruker D8 Venture with  $\lambda$  and  $\omega$  scans absorption corrections. The structure solution and refinement were processed by ShelXL (Sheldrick, 2015). The stereochemistry of other products was assumed by analogy.

**Method of crystallization:** A solution of **3a** in EA and petroleum ether was evaporated the solvent slowly at room temperature.

**Crystal data and structure for 3a**

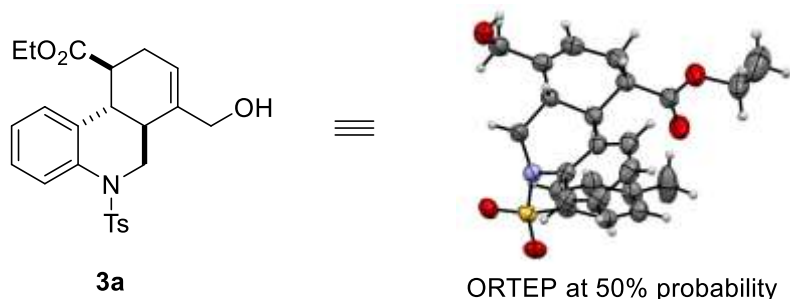

**Table S1 Crystal data and structure refinement for 3a.**

|                     |                                                   |
|---------------------|---------------------------------------------------|
| Identification code | <b>3a</b>                                         |
| Empirical formula   | C <sub>24</sub> H <sub>27</sub> NO <sub>5</sub> S |
| Formula weight      | 441.52                                            |
| Temperature/K       | 193.00                                            |
| Crystal system      | monoclinic                                        |
| Space group         | Pc                                                |

|                                                |                                                                  |
|------------------------------------------------|------------------------------------------------------------------|
| a/Å                                            | 8.3476(14)                                                       |
| b/Å                                            | 12.016(2)                                                        |
| c/Å                                            | 11.2069(19)                                                      |
| $\alpha/^\circ$                                | 90                                                               |
| $\beta/^\circ$                                 | 96.481(6)                                                        |
| $\gamma/^\circ$                                | 90                                                               |
| Volume/Å <sup>3</sup>                          | 1116.9(3)                                                        |
| Z                                              | 2                                                                |
| $\rho_{\text{calc}}/\text{g}/\text{cm}^3$      | 1.313                                                            |
| $\mu/\text{mm}^{-1}$                           | 1.031                                                            |
| F(000)                                         | 468.0                                                            |
| Crystal size/mm <sup>3</sup>                   | 0.12 × 0.1 × 0.1                                                 |
| Radiation                                      | GaK $\alpha$ ( $\lambda = 1.34139$ )                             |
| 2 $\Theta$ range for data collection/ $^\circ$ | 9.276 to 121.19                                                  |
| Index ranges                                   | -10 ≤ h ≤ 10, -15 ≤ k ≤ 15, -14 ≤ l ≤ 14                         |
| Reflections collected                          | 39835                                                            |
| Independent reflections                        | 5028 [ $R_{\text{int}} = 0.0505$ , $R_{\text{sigma}} = 0.0282$ ] |
| Data/restraints/parameters                     | 5028/3/294                                                       |
| Goodness-of-fit on F <sup>2</sup>              | 1.088                                                            |
| Final R indexes [ $I \geq 2\sigma(I)$ ]        | $R_1 = 0.0375$ , $wR_2 = 0.0986$                                 |
| Final R indexes [all data]                     | $R_1 = 0.0398$ , $wR_2 = 0.1006$                                 |
| Largest diff. peak/hole / e Å <sup>-3</sup>    | 0.17/-0.37                                                       |
| Flack parameter                                | 0.062(7)                                                         |

**Table S2 Fractional Atomic Coordinates ( $\times 10^4$ ) and Equivalent Isotropic Displacement Parameters ( $\text{\AA}^2 \times 10^3$ ) for A.  $U_{\text{eq}}$  is defined as 1/3 of the trace of the orthogonalised  $U_{ij}$  tensor.**

| <b>Atom</b> | <b>x</b>  | <b>y</b>   | <b>z</b>   | <b>U(eq)</b> |
|-------------|-----------|------------|------------|--------------|
| S1          | 1811.8(6) | 5815.0(5)  | 4630.1(5)  | 40.01(15)    |
| O1          | 1543(2)   | 4741.7(15) | 5138.7(16) | 47.3(4)      |
| O2          | 662(2)    | 6248.1(17) | 3710.6(17) | 48.9(4)      |
| O3          | 8375(3)   | 3596.6(16) | 5098(2)    | 59.7(5)      |
| N1          | 3553(3)   | 5721.3(16) | 4084.5(18) | 38.6(4)      |
| O5          | 8631(3)   | 9425.7(19) | 5145(3)    | 69.4(7)      |
| C5          | 2113(3)   | 6800(2)    | 5784(2)    | 39.9(5)      |
| O4          | 6278(3)   | 9293.5(19) | 5915(3)    | 80.0(9)      |
| C13         | 5324(3)   | 7288(2)    | 3796(2)    | 42.1(5)      |
| C4          | 2127(3)   | 7923(2)    | 5477(2)    | 42.4(5)      |
| C8          | 4014(3)   | 6626(2)    | 3361(2)    | 39.8(5)      |
| C14         | 6139(3)   | 6987(2)    | 5020(2)    | 43.5(5)      |
| C12         | 5800(4)   | 8126(2)    | 3055(3)    | 51.9(6)      |
| C11         | 4952(4)   | 8329(2)    | 1942(3)    | 57.9(7)      |
| C10         | 3633(4)   | 7685(3)    | 1545(2)    | 55.5(7)      |
| C6          | 2475(4)   | 6474(2)    | 6970(2)    | 47.3(6)      |
| C15         | 6476(3)   | 5724.6(19) | 4955(2)    | 39.4(5)      |
| C9          | 3167(4)   | 6813(2)    | 2240(2)    | 47.4(6)      |
| C20         | 8229(4)   | 7221(3)    | 6760(3)    | 57.2(7)      |
| C19         | 8306(3)   | 5972(3)    | 6836(3)    | 52.6(6)      |
| C17         | 7547(3)   | 5293(2)    | 6032(2)    | 45.1(5)      |
| C21         | 7670(3)   | 7618(2)    | 5472(3)    | 48.8(6)      |
| C16         | 4853(3)   | 5115(2)    | 4852(3)    | 45.7(5)      |
| C3          | 2545(4)   | 8704(2)    | 6354(2)    | 47.5(6)      |
| C22         | 7415(4)   | 8862(3)    | 5529(3)    | 57.2(7)      |
| C18         | 7780(4)   | 4050(2)    | 6134(3)    | 52.8(6)      |

**Table S2 Fractional Atomic Coordinates ( $\times 10^4$ ) and Equivalent Isotropic Displacement Parameters ( $\text{\AA}^2 \times 10^3$ ) for A.  $U_{\text{eq}}$  is defined as 1/3 of the trace of the orthogonalised  $U_{ij}$  tensor.**

| Atom | $x$      | $y$       | $z$      | $U(\text{eq})$ |
|------|----------|-----------|----------|----------------|
| C2   | 2922(4)  | 8390(3)   | 7545(3)  | 54.6(7)        |
| C7   | 2856(4)  | 7270(2)   | 7838(2)  | 55.0(7)        |
| C1   | 3391(8)  | 9254(3)   | 8487(4)  | 92.5(17)       |
| C23  | 8578(6)  | 10634(3)  | 5264(6)  | 90.5(15)       |
| C24  | 9338(8)  | 10971(5)  | 6506(9)  | 93(3)          |
| C24A | 9750(30) | 11014(14) | 4510(20) | 125(9)         |

**Table S3 Anisotropic Displacement Parameters ( $\text{\AA}^2 \times 10^3$ ) for A. The Anisotropic displacement factor exponent takes the form:  $-2\pi^2[h^2a^{*2}U_{11}+2hka^*b^*U_{12}+\dots]$ .**

| Atom | $U_{11}$ | $U_{22}$ | $U_{33}$ | $U_{23}$  | $U_{13}$ | $U_{12}$ |
|------|----------|----------|----------|-----------|----------|----------|
| S1   | 37.0(3)  | 45.4(3)  | 36.9(3)  | 1.7(2)    | 0.76(18) | -2.8(2)  |
| O1   | 45.9(10) | 46.8(10) | 49.2(10) | 3.8(8)    | 4.9(8)   | -9.1(8)  |
| O2   | 41.4(9)  | 61.6(11) | 41.5(9)  | 1.1(8)    | -5.8(7)  | 2.3(8)   |
| O3   | 60.0(12) | 44.4(10) | 74.2(13) | -2.6(10)  | 5.2(10)  | -2.4(9)  |
| N1   | 40.8(11) | 39.0(10) | 35.6(9)  | 3.2(7)    | 1.9(8)   | -0.5(7)  |
| O5   | 54.2(12) | 48.0(10) | 109(2)   | -6.1(12)  | 24.4(13) | -4.2(9)  |
| C5   | 36.3(11) | 45.3(12) | 38.1(11) | 2.2(9)    | 4.1(9)   | -0.6(9)  |
| O4   | 56.2(13) | 51.4(12) | 138(3)   | -27.1(13) | 35.6(15) | -3.9(10) |
| C13  | 44.6(12) | 37.7(11) | 45.7(12) | -0.1(9)   | 12.1(10) | 0.3(9)   |
| C4   | 42.3(12) | 46.8(13) | 38.0(11) | 5.1(10)   | 4.5(9)   | 2.0(10)  |
| C8   | 48.3(13) | 37.4(11) | 34.5(11) | -1.0(8)   | 8.7(9)   | 2.2(9)   |
| C14  | 41.6(12) | 42.4(12) | 47.0(12) | -2.6(10)  | 7.1(10)  | -2.2(10) |

**Table S3 Anisotropic Displacement Parameters ( $\text{\AA}^2 \times 10^3$ ) for A. The Anisotropic displacement factor exponent takes the form:  $-2\pi^2[h^2a^{*2}U_{11}+2hka^*b^*U_{12}+\dots]$ .**

| Atom | $U_{11}$ | $U_{22}$ | $U_{33}$ | $U_{23}$  | $U_{13}$ | $U_{12}$ |
|------|----------|----------|----------|-----------|----------|----------|
| C12  | 56.3(16) | 43.7(13) | 58.5(15) | 4.4(11)   | 18.6(13) | -2.0(11) |
| C11  | 78(2)    | 46.6(14) | 53.5(15) | 11.9(12)  | 25.6(14) | 7.7(14)  |
| C10  | 78(2)    | 52.9(15) | 37.2(12) | 6.3(11)   | 14.2(12) | 11.4(13) |
| C6   | 57.0(15) | 46.8(13) | 38.0(12) | 5.4(10)   | 4.3(10)  | -3.7(11) |
| C15  | 36.3(11) | 41.0(12) | 41.5(11) | 0.3(9)    | 6.6(9)   | -2.5(9)  |
| C9   | 59.9(16) | 45.7(13) | 36.7(11) | -0.3(10)  | 5.6(10)  | 5.7(11)  |
| C20  | 45.2(14) | 61.2(17) | 64.1(17) | -15.7(14) | 1.9(12)  | -0.5(12) |
| C19  | 42.3(14) | 66.0(17) | 48.6(14) | -1.0(12)  | 1.3(11)  | -0.2(12) |
| C17  | 37.4(11) | 52.4(14) | 45.4(12) | 6.3(11)   | 4.4(9)   | -0.9(10) |
| C21  | 38.8(12) | 44.0(13) | 65.3(16) | -9.1(12)  | 13.2(12) | -1.7(10) |
| C16  | 40.5(12) | 39.9(12) | 55.0(13) | 9.6(10)   | -1.9(10) | -1.1(10) |
| C3   | 55.6(15) | 42.4(13) | 45.3(13) | 4.9(10)   | 8.5(11)  | -2.3(11) |
| C22  | 45.4(14) | 43.8(13) | 83(2)    | -13.4(14) | 10.3(13) | -0.1(11) |
| C18  | 45.7(14) | 53.3(15) | 57.6(15) | 13.3(12)  | -2.2(12) | -4.4(11) |
| C2   | 71.5(19) | 50.0(14) | 41.5(13) | 0.5(11)   | 2.2(12)  | -8.8(13) |
| C7   | 74.3(18) | 52.5(15) | 36.9(12) | 5.9(11)   | 0.7(12)  | -4.5(13) |
| C1   | 162(5)   | 58(2)    | 52.6(18) | -5.4(15)  | -12(2)   | -27(2)   |
| C23  | 73(2)    | 47.8(17) | 156(5)   | -1(2)     | 35(3)    | -4.6(16) |
| C24  | 68(4)    | 52(3)    | 158(8)   | -27(4)    | 7(4)     | 1(2)     |
| C24A | 145(17)  | 73(9)    | 170(20)  | 9(10)     | 66(15)   | 10(10)   |

**Table S4 Bond Lengths for 3a.**

**Atom Atom Length/ $\text{\AA}$       Atom Atom Length/ $\text{\AA}$**

**Table S4 Bond Lengths for 3a.**

| Atom Atom Length/Å |     |            | Atom Atom Length/Å |      |           |
|--------------------|-----|------------|--------------------|------|-----------|
| S1                 | O1  | 1.4378(18) | C14                | C21  | 1.523(4)  |
| S1                 | O2  | 1.4249(19) | C12                | C11  | 1.385(5)  |
| S1                 | N1  | 1.643(2)   | C11                | C10  | 1.377(5)  |
| S1                 | C5  | 1.751(3)   | C10                | C9   | 1.387(4)  |
| O3                 | C18 | 1.422(4)   | C6                 | C7   | 1.375(4)  |
| N1                 | C8  | 1.434(3)   | C15                | C17  | 1.510(4)  |
| N1                 | C16 | 1.495(3)   | C15                | C16  | 1.533(3)  |
| O5                 | C22 | 1.332(4)   | C20                | C19  | 1.504(4)  |
| O5                 | C23 | 1.459(4)   | C20                | C21  | 1.542(5)  |
| C5                 | C4  | 1.392(3)   | C19                | C17  | 1.322(4)  |
| C5                 | C6  | 1.386(4)   | C17                | C18  | 1.509(4)  |
| O4                 | C22 | 1.204(4)   | C21                | C22  | 1.512(4)  |
| C13                | C8  | 1.394(4)   | C3                 | C2   | 1.388(4)  |
| C13                | C14 | 1.505(4)   | C2                 | C7   | 1.388(4)  |
| C13                | C12 | 1.391(4)   | C2                 | C1   | 1.500(4)  |
| C4                 | C3  | 1.376(4)   | C23                | C24  | 1.518(10) |
| C8                 | C9  | 1.389(3)   | C23                | C24A | 1.442(17) |
| C14                | C15 | 1.546(3)   |                    |      |           |

**Table S5 Bond Angles for 3a.**

| Atom Atom Atom Angle/° |    |    |            | Atom Atom Atom Angle/° |     |     |          |
|------------------------|----|----|------------|------------------------|-----|-----|----------|
| O1                     | S1 | N1 | 105.69(11) | C7                     | C6  | C5  | 119.3(3) |
| O1                     | S1 | C5 | 109.24(11) | C17                    | C15 | C14 | 113.2(2) |
| O2                     | S1 | O1 | 119.45(12) | C17                    | C15 | C16 | 109.6(2) |
| O2                     | S1 | N1 | 107.92(11) | C16                    | C15 | C14 | 108.0(2) |

**Table S5 Bond Angles for 3a.**

| Atom | Atom | Atom | Angle/°    | Atom | Atom | Atom | Angle/°  |
|------|------|------|------------|------|------|------|----------|
| O2   | S1   | C5   | 108.42(12) | C10  | C9   | C8   | 118.9(3) |
| N1   | S1   | C5   | 105.19(11) | C19  | C20  | C21  | 111.6(2) |
| C8   | N1   | S1   | 117.60(16) | C17  | C19  | C20  | 124.3(3) |
| C8   | N1   | C16  | 118.1(2)   | C19  | C17  | C15  | 121.8(2) |
| C16  | N1   | S1   | 115.73(17) | C19  | C17  | C18  | 120.7(3) |
| C22  | O5   | C23  | 116.4(3)   | C18  | C17  | C15  | 117.4(2) |
| C4   | C5   | S1   | 118.46(19) | C14  | C21  | C20  | 108.1(2) |
| C6   | C5   | S1   | 120.9(2)   | C22  | C21  | C14  | 112.9(2) |
| C6   | C5   | C4   | 120.3(2)   | C22  | C21  | C20  | 107.2(2) |
| C8   | C13  | C14  | 115.9(2)   | N1   | C16  | C15  | 112.8(2) |
| C12  | C13  | C8   | 118.0(2)   | C4   | C3   | C2   | 120.9(3) |
| C12  | C13  | C14  | 126.0(3)   | O5   | C22  | C21  | 111.9(2) |
| C3   | C4   | C5   | 119.5(2)   | O4   | C22  | O5   | 123.9(3) |
| C13  | C8   | N1   | 119.0(2)   | O4   | C22  | C21  | 124.2(3) |
| C9   | C8   | N1   | 119.5(2)   | O3   | C18  | C17  | 111.8(2) |
| C9   | C8   | C13  | 121.5(2)   | C3   | C2   | C7   | 118.6(3) |
| C13  | C14  | C15  | 105.0(2)   | C3   | C2   | C1   | 120.1(3) |
| C13  | C14  | C21  | 117.4(2)   | C7   | C2   | C1   | 121.3(3) |
| C21  | C14  | C15  | 110.8(2)   | C6   | C7   | C2   | 121.3(3) |
| C11  | C12  | C13  | 120.9(3)   | O5   | C23  | C24  | 109.6(4) |
| C10  | C11  | C12  | 120.0(3)   | C24A | C23  | O5   | 103.4(8) |
| C11  | C10  | C9   | 120.5(3)   |      |      |      |          |

**Table S6 Torsion Angles for 3a.**

| A | B | C | D | Angle/° | A | B | C | D | Angle/° |
|---|---|---|---|---------|---|---|---|---|---------|
|---|---|---|---|---------|---|---|---|---|---------|

**Table S6 Torsion Angles for 3a.**

| A   | B   | C   | D   | Angle/°     | A   | B   | C   | D   | Angle/°   |
|-----|-----|-----|-----|-------------|-----|-----|-----|-----|-----------|
| S1  | N1  | C8  | C13 | 112.6(2)    | C14 | C15 | C17 | C19 | -10.0(4)  |
| S1  | N1  | C8  | C9  | -68.4(3)    | C14 | C15 | C17 | C18 | 172.5(2)  |
| S1  | N1  | C16 | C15 | -134.5(2)   | C14 | C15 | C16 | N1  | 37.6(3)   |
| S1  | C5  | C4  | C3  | -172.5(2)   | C14 | C21 | C22 | O5  | -138.7(3) |
| S1  | C5  | C6  | C7  | 173.8(2)    | C14 | C21 | C22 | O4  | 43.8(5)   |
| O1  | S1  | N1  | C8  | 170.90(17)  | C12 | C13 | C8  | N1  | 176.8(2)  |
| O1  | S1  | N1  | C16 | -41.8(2)    | C12 | C13 | C8  | C9  | -2.1(4)   |
| O1  | S1  | C5  | C4  | -169.43(19) | C12 | C13 | C14 | C15 | -126.4(3) |
| O1  | S1  | C5  | C6  | 16.4(3)     | C12 | C13 | C14 | C21 | -2.9(4)   |
| O2  | S1  | N1  | C8  | 42.0(2)     | C12 | C11 | C10 | C9  | -1.6(4)   |
| O2  | S1  | N1  | C16 | -170.65(18) | C11 | C10 | C9  | C8  | 2.4(4)    |
| O2  | S1  | C5  | C4  | -37.7(2)    | C6  | C5  | C4  | C3  | 1.7(4)    |
| O2  | S1  | C5  | C6  | 148.1(2)    | C15 | C14 | C21 | C20 | -62.7(3)  |
| N1  | S1  | C5  | C4  | 77.5(2)     | C15 | C14 | C21 | C22 | 178.9(2)  |
| N1  | S1  | C5  | C6  | -96.6(2)    | C15 | C17 | C18 | O3  | 55.9(3)   |
| N1  | C8  | C9  | C10 | -179.4(2)   | C20 | C19 | C17 | C15 | -1.6(4)   |
| C5  | S1  | N1  | C8  | -73.57(19)  | C20 | C19 | C17 | C18 | 175.9(3)  |
| C5  | S1  | N1  | C16 | 73.8(2)     | C20 | C21 | C22 | O5  | 102.3(3)  |
| C5  | C4  | C3  | C2  | -1.3(4)     | C20 | C21 | C22 | O4  | -75.2(4)  |
| C5  | C6  | C7  | C2  | -1.6(5)     | C19 | C20 | C21 | C14 | 50.3(3)   |
| C13 | C8  | C9  | C10 | -0.5(4)     | C19 | C20 | C21 | C22 | 172.3(2)  |
| C13 | C14 | C15 | C17 | 170.2(2)    | C19 | C17 | C18 | O3  | -121.6(3) |
| C13 | C14 | C15 | C16 | -68.4(3)    | C17 | C15 | C16 | N1  | 161.2(2)  |
| C13 | C14 | C21 | C20 | 176.7(2)    | C21 | C14 | C15 | C17 | 42.6(3)   |
| C13 | C14 | C21 | C22 | 58.3(3)     | C21 | C14 | C15 | C16 | 164.0(2)  |



**Table S6 Torsion Angles for 3a.**

| A   | B   | C   | D   | Angle/°   | A   | B   | C   | D    | Angle/°    |
|-----|-----|-----|-----|-----------|-----|-----|-----|------|------------|
| C13 | C12 | C11 | C10 | -1.1(4)   | C21 | C20 | C19 | C17  | -19.3(4)   |
| C4  | C5  | C6  | C7  | -0.3(4)   | C16 | N1  | C8  | C13  | -33.9(3)   |
| C4  | C3  | C2  | C7  | -0.5(5)   | C16 | N1  | C8  | C9   | 145.1(2)   |
| C4  | C3  | C2  | C1  | 179.4(4)  | C16 | C15 | C17 | C19  | -130.6(3)  |
| C8  | N1  | C16 | C15 | 12.6(3)   | C16 | C15 | C17 | C18  | 51.9(3)    |
| C8  | C13 | C14 | C15 | 50.7(3)   | C3  | C2  | C7  | C6   | 2.0(5)     |
| C8  | C13 | C14 | C21 | 174.2(2)  | C22 | O5  | C23 | C24  | 86.3(5)    |
| C8  | C13 | C12 | C11 | 2.9(4)    | C22 | O5  | C23 | C24A | -165.2(12) |
| C14 | C13 | C8  | N1  | -0.6(3)   | C1  | C2  | C7  | C6   | -177.9(4)  |
| C14 | C13 | C8  | C9  | -179.5(2) | C23 | O5  | C22 | O4   | 2.9(6)     |
| C14 | C13 | C12 | C11 | -180.0(3) | C23 | O5  | C22 | C21  | -174.6(4)  |

**Table S7 Hydrogen Atom Coordinates ( $\text{\AA} \times 10^4$ ) and Isotropic Displacement Parameters ( $\text{\AA}^2 \times 10^3$ ) for 3a.**

| Atom | <i>x</i> | <i>y</i> | <i>z</i> | U(eq) |
|------|----------|----------|----------|-------|
| H3   | 9229.67  | 3925.31  | 4976.48  | 90    |
| H4   | 1850.16  | 8147.32  | 4666.89  | 51    |
| H14  | 5343.93  | 7102.17  | 5611.8   | 52    |
| H12  | 6719.37  | 8564.69  | 3316.6   | 62    |
| H11  | 5279.79  | 8912.04  | 1451.29  | 69    |
| H10  | 3038.08  | 7839.53  | 789.78   | 67    |
| H6   | 2461.66  | 5708.11  | 7180.78  | 57    |
| H15  | 7007.8   | 5570.87  | 4215.8   | 47    |
| H9   | 2281.75  | 6351.77  | 1954.25  | 57    |
| H20A | 9308.4   | 7533.79  | 7023.58  | 69    |

**Table S7 Hydrogen Atom Coordinates ( $\text{\AA}\times 10^4$ ) and Isotropic Displacement Parameters ( $\text{\AA}^2\times 10^3$ ) for 3a.**

| Atom | <i>x</i> | <i>y</i> | <i>z</i> | U(eq) |
|------|----------|----------|----------|-------|
| H20B | 7472.42  | 7501.37  | 7310.12  | 69    |
| H19  | 8940.03  | 5649.6   | 7504.42  | 63    |
| H21  | 8527.46  | 7454.05  | 4941.71  | 59    |
| H16A | 4986.75  | 4365.9   | 4508.13  | 55    |
| H16B | 4518.5   | 5016.62  | 5664.99  | 55    |
| H3A  | 2576.92  | 9468.12  | 6142.64  | 57    |
| H18A | 8547.78  | 3881.14  | 6849.99  | 63    |
| H18B | 6737.26  | 3693.75  | 6244.5   | 63    |
| H7   | 3077.37  | 7048.13  | 8653.41  | 66    |
| H1A  | 4507.3   | 9127.94  | 8833.85  | 139   |
| H1B  | 2674.81  | 9202.81  | 9119.49  | 139   |
| H1C  | 3298.33  | 9995.57  | 8121.32  | 139   |
| H23A | 7444.87  | 10892.47 | 5141.05  | 109   |
| H23B | 9169.24  | 10985.52 | 4645.65  | 109   |
| H23C | 7491.61  | 10925.98 | 4982.09  | 109   |
| H23D | 8873.82  | 10865.12 | 6107.98  | 109   |
| H24A | 8819.88  | 10562.21 | 7115.02  | 139   |
| H24B | 9193.52  | 11771.89 | 6616.8   | 139   |
| H24C | 10491.71 | 10795.03 | 6587.86  | 139   |
| H24D | 10832.42 | 10782.56 | 4854.44  | 188   |
| H24E | 9711.39  | 11826.97 | 4448.95  | 188   |
| H24F | 9515.82  | 10689.05 | 3704.7   | 188   |

**Table S8 Atomic Occupancy for 3a.**

| <i>Atom Occupancy</i> | <i>Atom Occupancy</i> | <i>Atom Occupancy</i> |
|-----------------------|-----------------------|-----------------------|
| H23A 0.668(16)        | H23B 0.668(16)        | H23C 0.332(16)        |
| H23D 0.332(16)        | C24 0.668(16)         | H24A 0.668(16)        |
| H24B 0.668(16)        | H24C 0.668(16)        | C24A 0.332(16)        |
| H24D 0.332(16)        | H24E 0.332(16)        | H24F 0.332(16)        |

# NMR Spectra

3sjwei 5113 yzk-2-61-fr 1h cdcl3

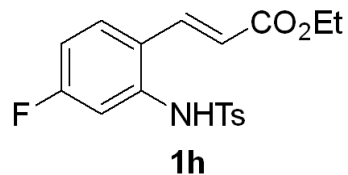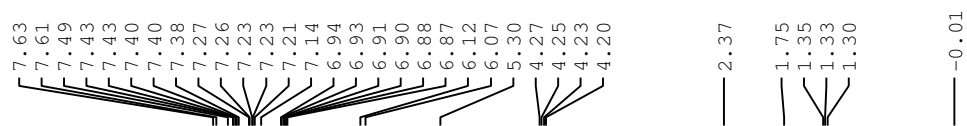

Current Data Parameters  
NAME YZK-2-61  
EXPNO 5113  
PROCNO 1

F2 - Acquisition Parameters  
Date\_ 20210828  
Time 10.07  
INSTRUM spect  
PROBHD 5 mm PABBO BB-  
PULPROG zg30  
TD 65536  
SOLVENT CDCl3  
NS 16  
DS 2  
SWH 6009.615 Hz  
FIDRES 0.091699 Hz  
AQ 5.4525952 sec  
RG 203  
DW 83.200 usec  
DE 6.50 usec  
TE -59.1 K  
D1 1.00000000 sec  
TD0 1

==== CHANNEL f1 =====  
SFO1 300.1318534 MHz  
NUC1 1H  
P1 10.00 usec  
PLW1 14.00000000 W

F2 - Processing parameters  
SI 65536  
SF 300.1300073 MHz  
WDW EM  
SSB 0  
LB 0.30 Hz  
GB 0  
PC 1.00

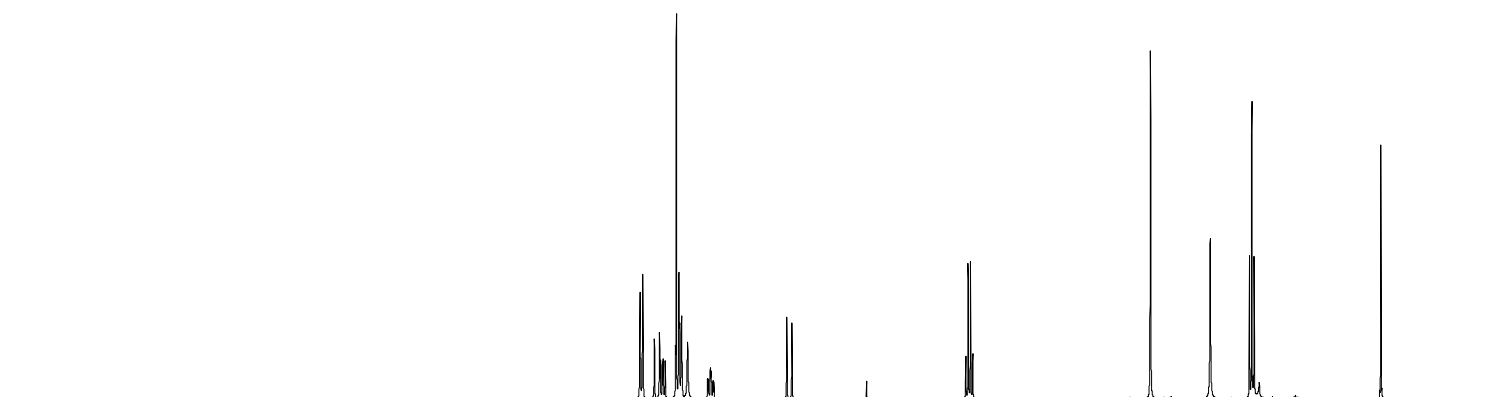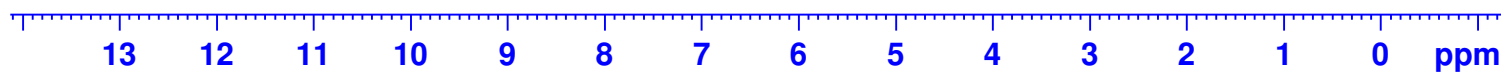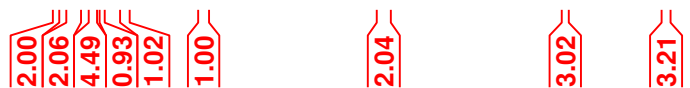

3sjwei 5139 yzk-2-61-ffr 13c cdcl3

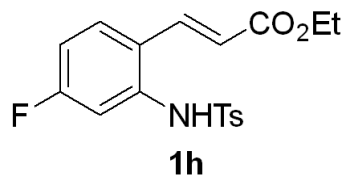

166.57  
165.33  
162.00  
144.17  
137.96  
136.65  
136.51  
135.66  
129.74  
128.72  
128.60  
127.16  
125.47  
125.43  
120.43  
120.41  
114.17  
113.88  
113.45  
113.13

77.42  
77.00  
76.57

60.91

21.46  
14.19

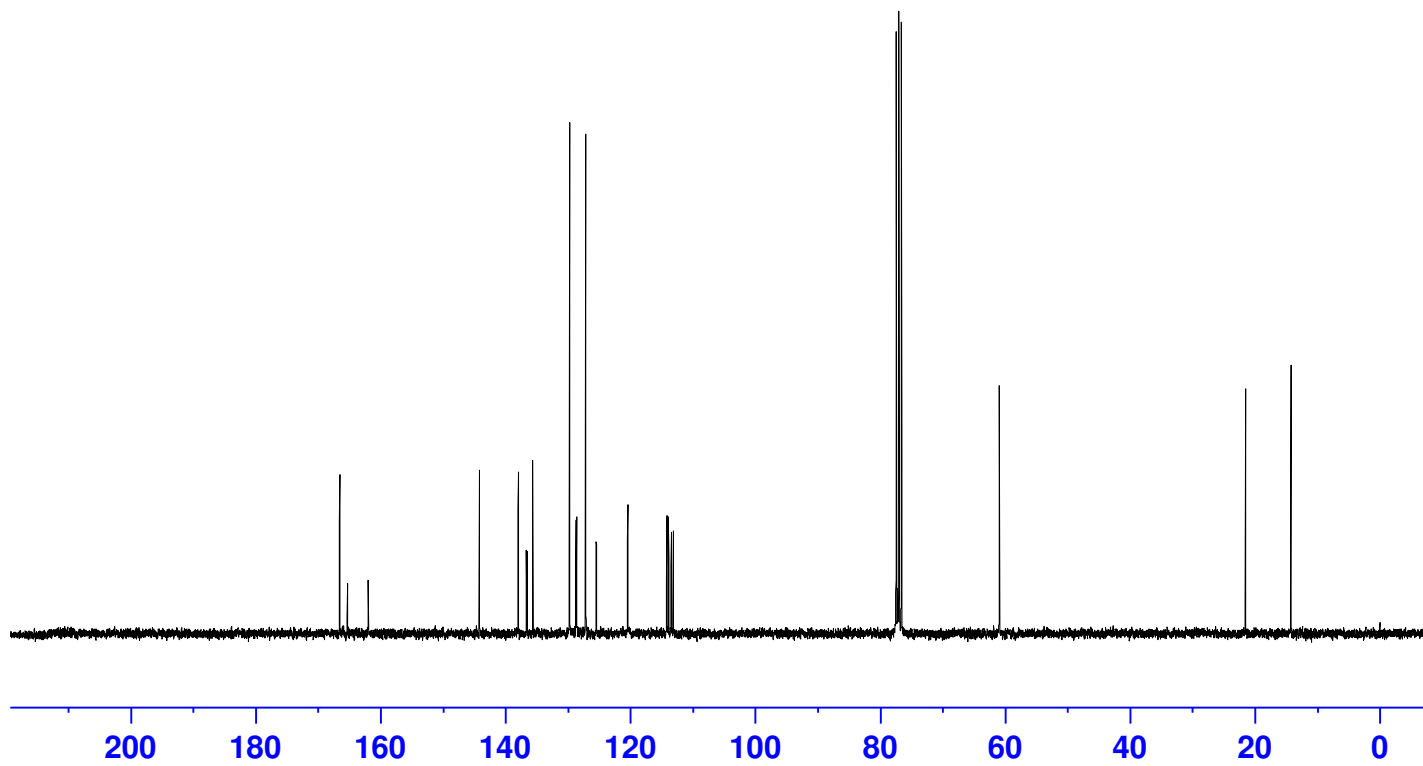

Current Data Parameters  
NAME 1h-zyk-2-61-C  
EXPNO 1  
PROCNO 1

F2 - Acquisition Parameters  
Date\_ 20210830  
Time 10.21  
INSTRUM spect  
PROBHD 5 mm PABBO BB-  
PULPROG zgpg30  
TD 65536  
SOLVENT CDCl3  
NS 500  
DS 4  
SWH 18028.846 Hz  
FIDRES 0.275098 Hz  
AQ 1.8175317 sec  
RG 203  
DW 27.733 usec  
DE 6.50 usec  
TE -59.1 K  
D1 2.00000000 sec  
D11 0.03000000 sec  
TD0 1

=====  
CHANNEL f1  
SFO1 75.4752949 MHz  
NUC1 13C  
P1 9.50 usec  
PLW1 34.20000076 W

=====  
CHANNEL f2  
SFO2 300.1312005 MHz  
NUC2 1H  
CPDPRG[2] waltz16  
PCPD2 90.00 usec  
PLW2 14.00000000 W  
PLW12 0.17284000 W  
PLW13 0.14000000 W

F2 - Processing parameters  
SI 32768  
SF 75.4677536 MHz  
WDW EM  
SSB 0  
LB 1.00 Hz  
GB 0  
PC 1.40

3sjwei 5114 yzk-2-61-fr 19f cdcl3

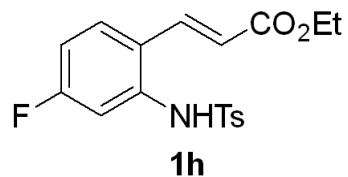

-107.58

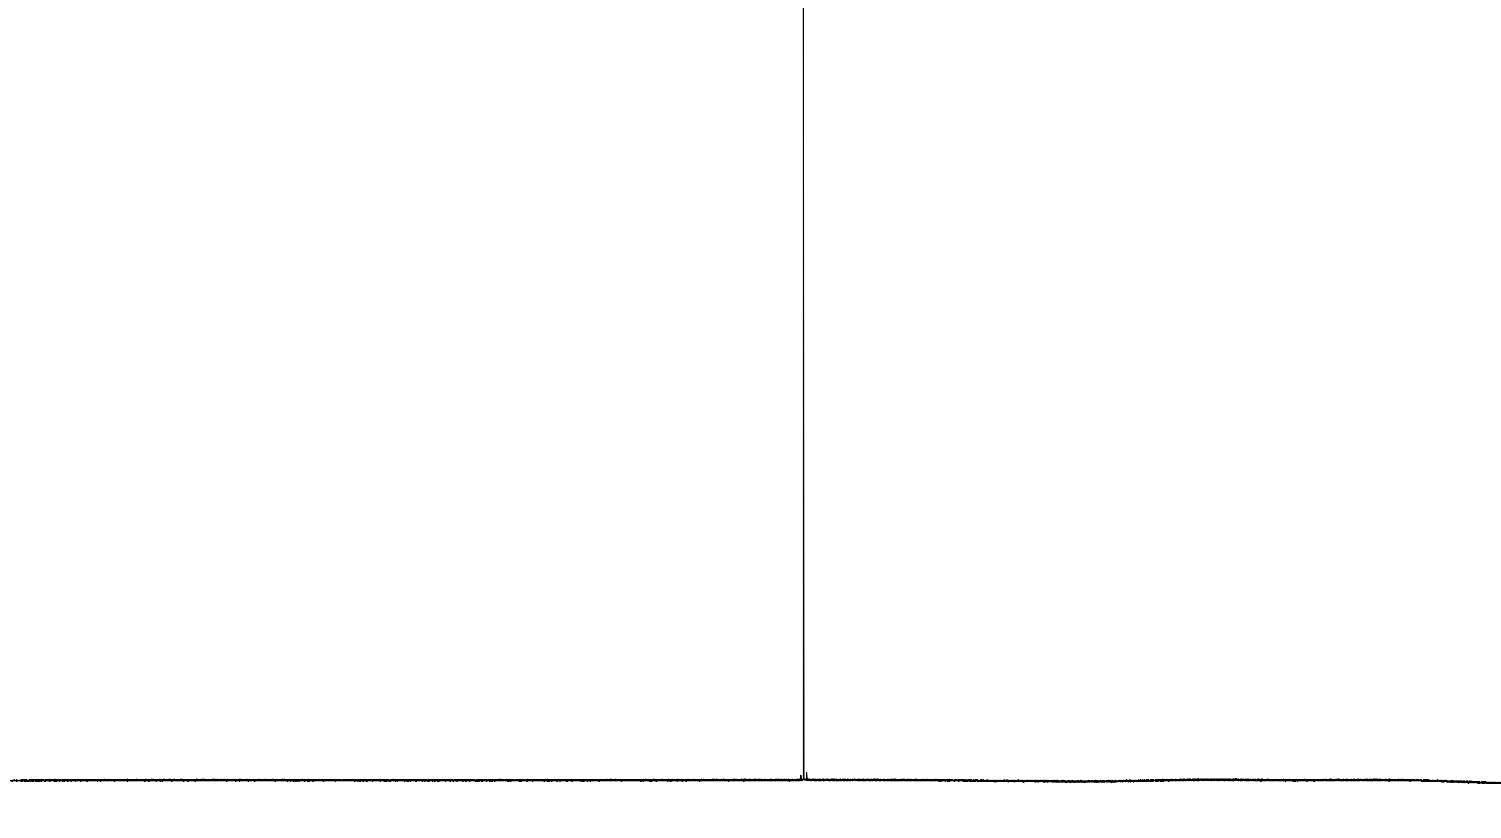

Current Data Parameters  
NAME workup  
EXPNO 5114  
PROCNO 1

F2 - Acquisition Parameters  
Date\_ 20210828  
Time 10.09  
INSTRUM spect  
PROBHD 5 mm PABBO BB-  
PULPROG zgfhigqn.2  
TD 131072  
SOLVENT CDCl3  
NS 16  
DS 4  
SWH 66964.289 Hz  
FIDRES 0.510897 Hz  
AQ 0.9786710 sec  
RG 203  
DW 7.467 usec  
DE 6.50 usec  
TE -59.1 K  
D1 1.00000000 sec  
D11 0.03000000 sec  
D12 0.00002000 sec  
TD0 1

==== CHANNEL f1 =====  
SFO1 282.3761148 MHz  
NUC1 19F  
P1 14.50 usec  
PLW1 10.39999962 W

==== CHANNEL f2 =====  
SFO2 300.1312005 MHz  
NUC2 1H  
CPDPRG[2] waltz16  
PCPD2 90.00 usec  
PLW2 14.00000000 W  
PLW12 0.17284000 W

F2 - Processing parameters  
SI 65536  
SF 282.4043552 MHz  
WDW EM  
SSB 0  
LB 0.30 Hz  
GB 0  
PC 1.00

yzk-4-1b

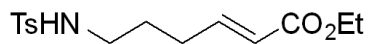

11

7.74  
7.72  
7.30  
7.28  
7.26  
6.86  
6.84  
6.82  
6.82  
6.80  
6.78  
5.75  
5.72  
4.97  
4.18  
4.16  
4.14  
4.13  
2.94  
2.92  
2.41  
2.21  
2.21  
2.19  
2.17  
2.15  
1.63  
1.61  
1.59  
1.28  
1.26  
1.24

Current Data Parameters  
NAME 0804  
EXPNO 168  
PROCNO 1

F2 - Acquisition Parameters  
Date\_ 20220805  
Time 3.06  
INSTRUM spect  
PROBHD 5 mm PABBO BB-  
PULPROG zg30  
TD 65536  
SOLVENT CDC13  
NS 8  
DS 2  
SWH 8223.685 Hz  
FIDRES 0.125483 Hz  
AQ 3.9845889 sec  
RG 90.23  
DW 60.800 usec  
DE 6.50 usec  
TE 294.9 K  
D1 1.00000000 sec  
TD0 1

===== CHANNEL f1 =====  
NUC1 1H  
P1 14.68 usec  
PLW1 14.00000000 W  
SFO1 400.1924713 MHz

F2 - Processing parameters  
SI 65536  
SF 400.1900163 MHz  
WDW EM  
SSB 0  
LB 0.30 Hz  
GB 0  
PC 1.00

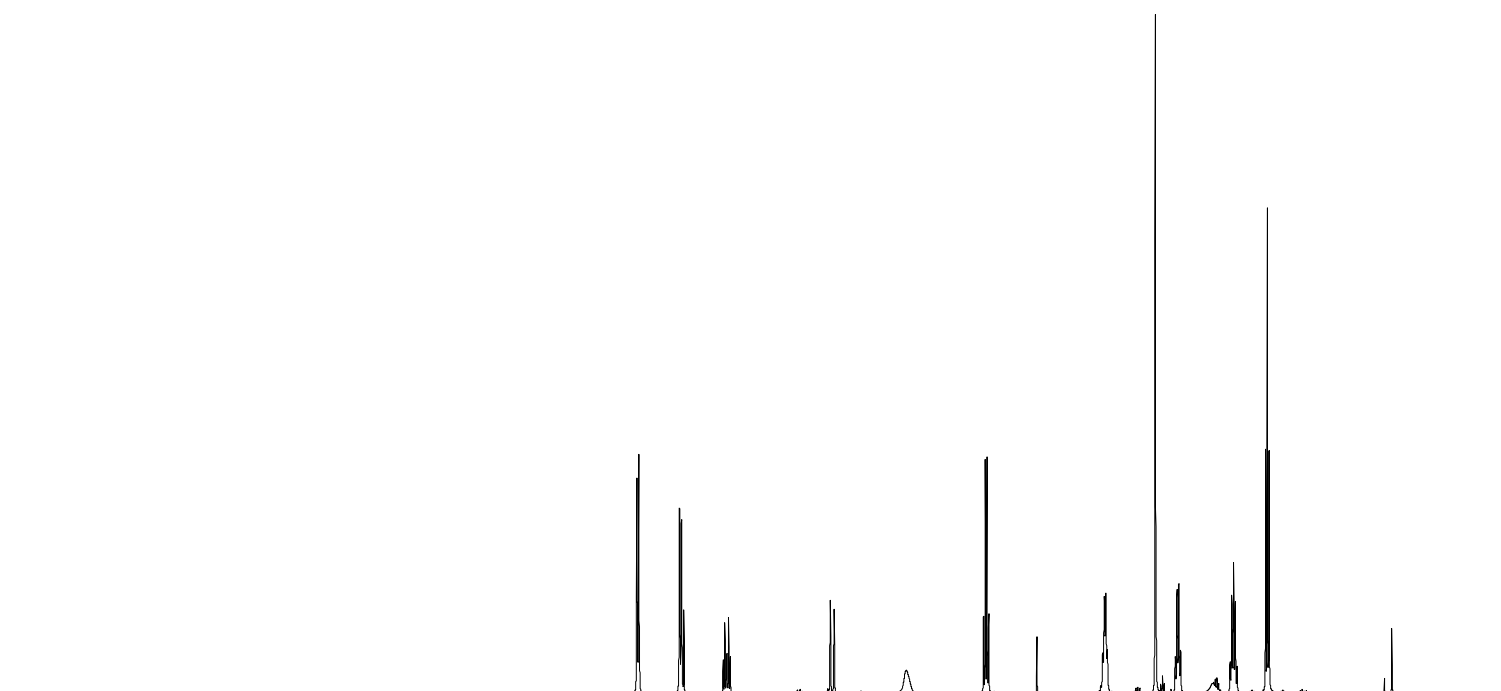

14 13 12 11 10 9 8 7 6 5 4 3 2 1 0 ppm

2.26  
2.17  
1.00  
1.02  
1.03  
2.11  
2.25  
3.35  
2.02  
2.16  
3.35

yzk-4-1b

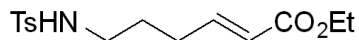

11

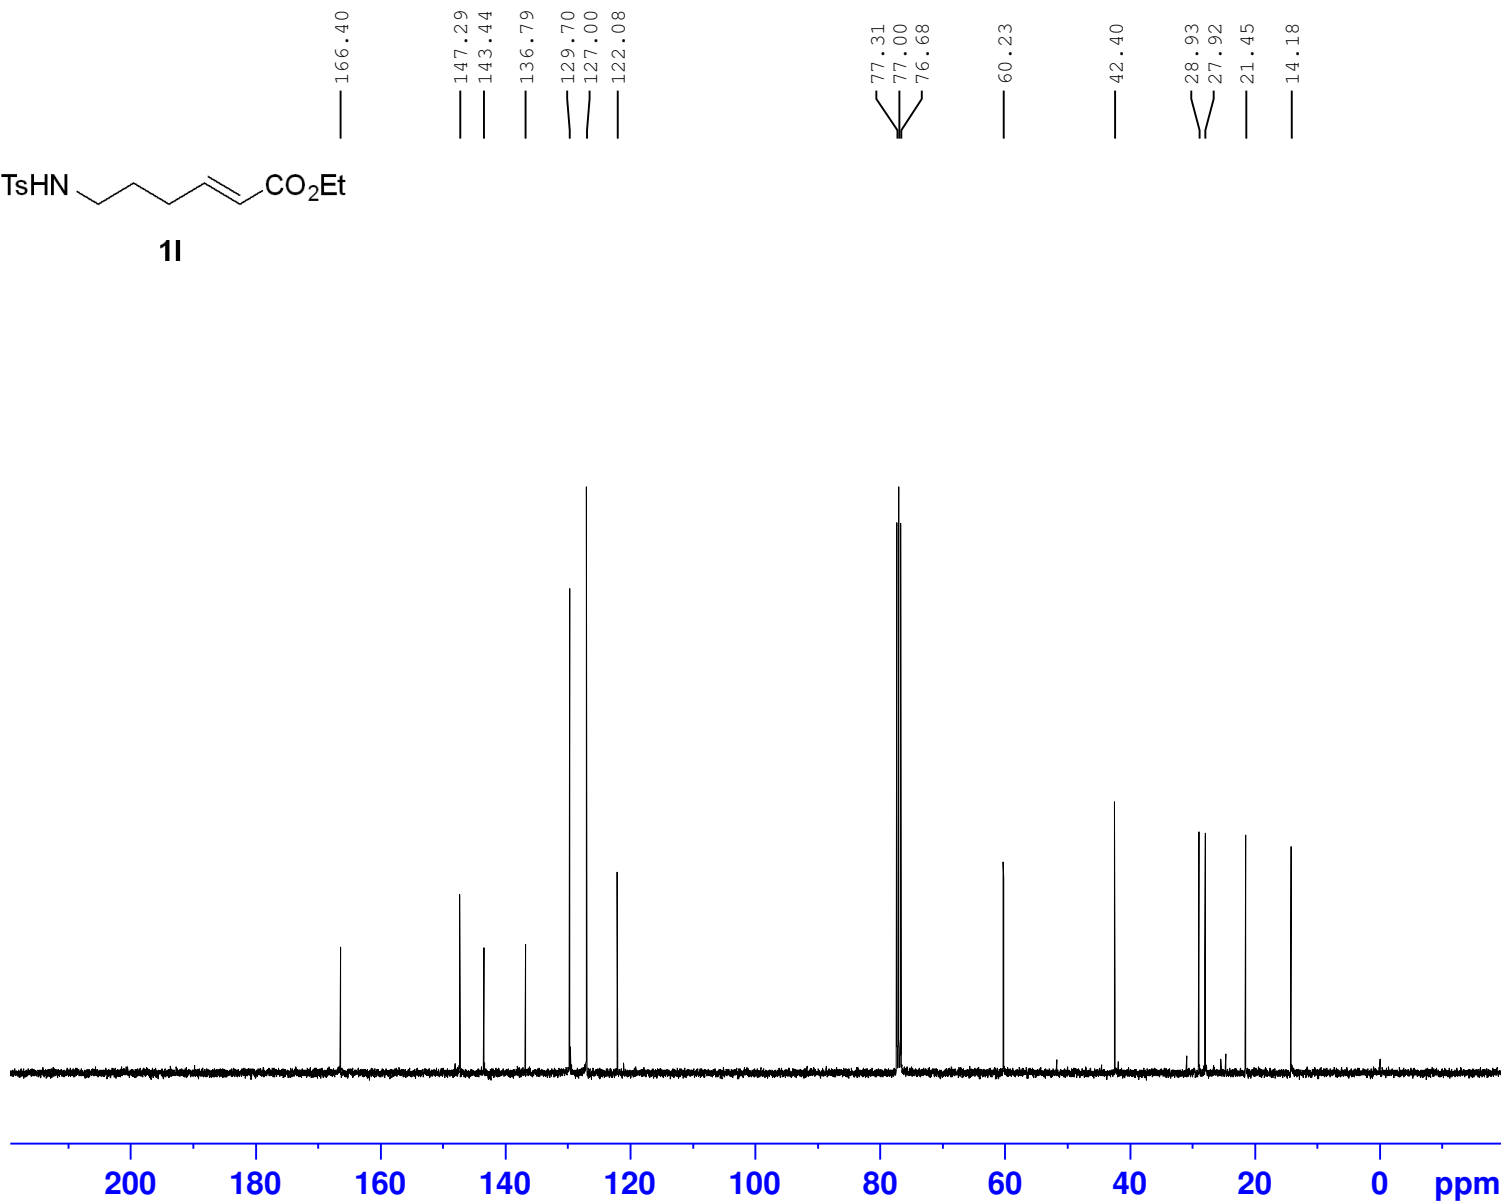

Current Data Parameters  
NAME 0804  
EXPNO 169  
PROCNO 1

F2 - Acquisition Parameters  
Date\_ 20220805  
Time 3.24  
INSTRUM spect  
PROBHD 5 mm PABBO BB-  
PULPROG zgpg30  
TD 65536  
SOLVENT CDC13  
NS 300  
DS 4  
SWH 24038.461 Hz  
FIDRES 0.366798 Hz  
AQ 1.3631488 sec  
RG 193.13  
DW 20.800 usec  
DE 6.50 usec  
TE 295.7 K  
D1 2.00000000 sec  
D11 0.03000000 sec  
TD0 1

===== CHANNEL f1 =====  
NUC1 13C  
P1 12.00 usec  
PLW1 53.00000000 W  
SFO1 100.6379178 MHz

===== CHANNEL f2 =====  
CPDPRG[2] waltz16  
NUC2 1H  
PCPD2 90.00 usec  
PLW2 14.00000000 W  
PLW12 0.37246999 W  
PLW13 0.30170000 W  
SFO2 400.1916008 MHz

F2 - Processing parameters  
SI 32768  
SF 100.6278645 MHz  
WDW EM  
SSB 0  
LB 1.00 Hz  
GB 0  
PC 1.40



3sjwei 5491 yzk-2-97-fr 1h cdcl3

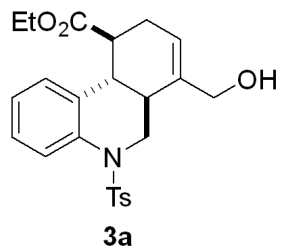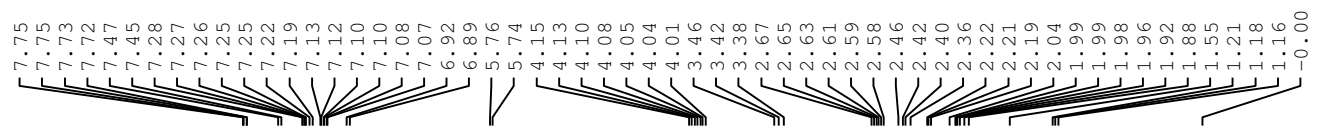

Current Data Parameters  
NAME YZK-2-97  
EXPNO 5491  
PROCNO 1

F2 - Acquisition Parameters  
Date\_ 20210930  
Time 10.08  
INSTRUM spect  
PROBHD 5 mm PABBO BB-  
PULPROG zg30  
TD 65536  
SOLVENT CDC13  
NS 16  
DS 2  
SWH 6009.615 Hz  
FIDRES 0.091699 Hz  
AQ 5.4525952 sec  
RG 161  
DW 83.200 usec  
DE 6.50 usec  
TE -59.1 K  
D1 1.00000000 sec  
TD0 1

==== CHANNEL f1 =====  
SFO1 300.1318534 MHz  
NUC1 1H  
P1 10.00 usec  
PLW1 14.00000000 W

F2 - Processing parameters  
SI 65536  
SF 300.1300072 MHz  
WDW EM  
SSB 0  
LB 0.30 Hz  
GB 0  
PC 1.00

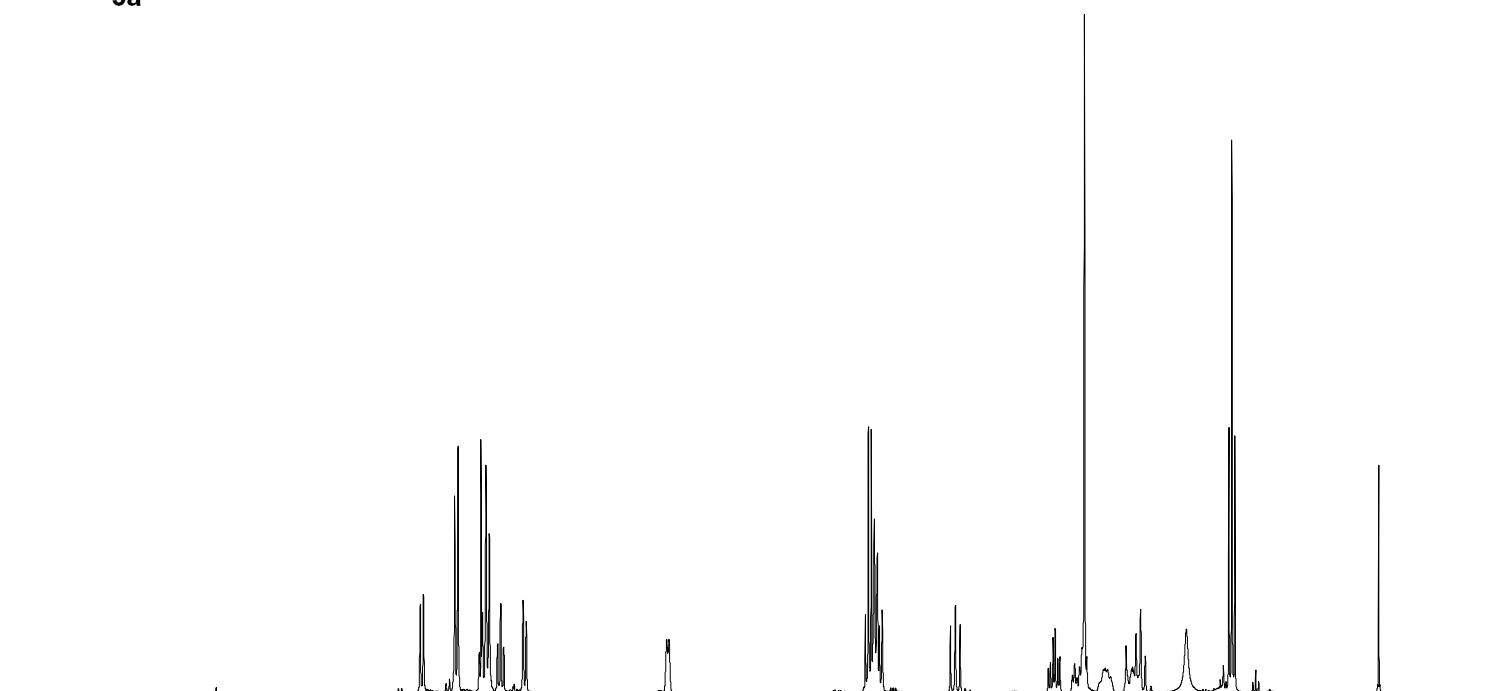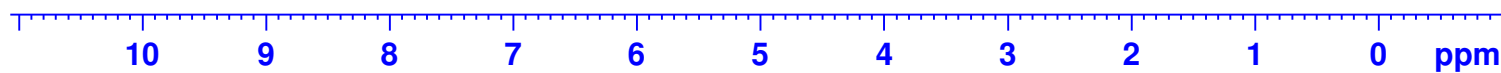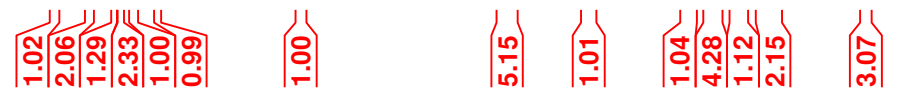

Yzk-2-52-fr

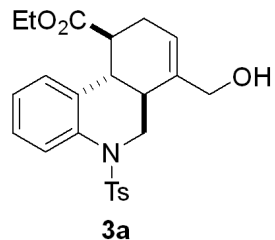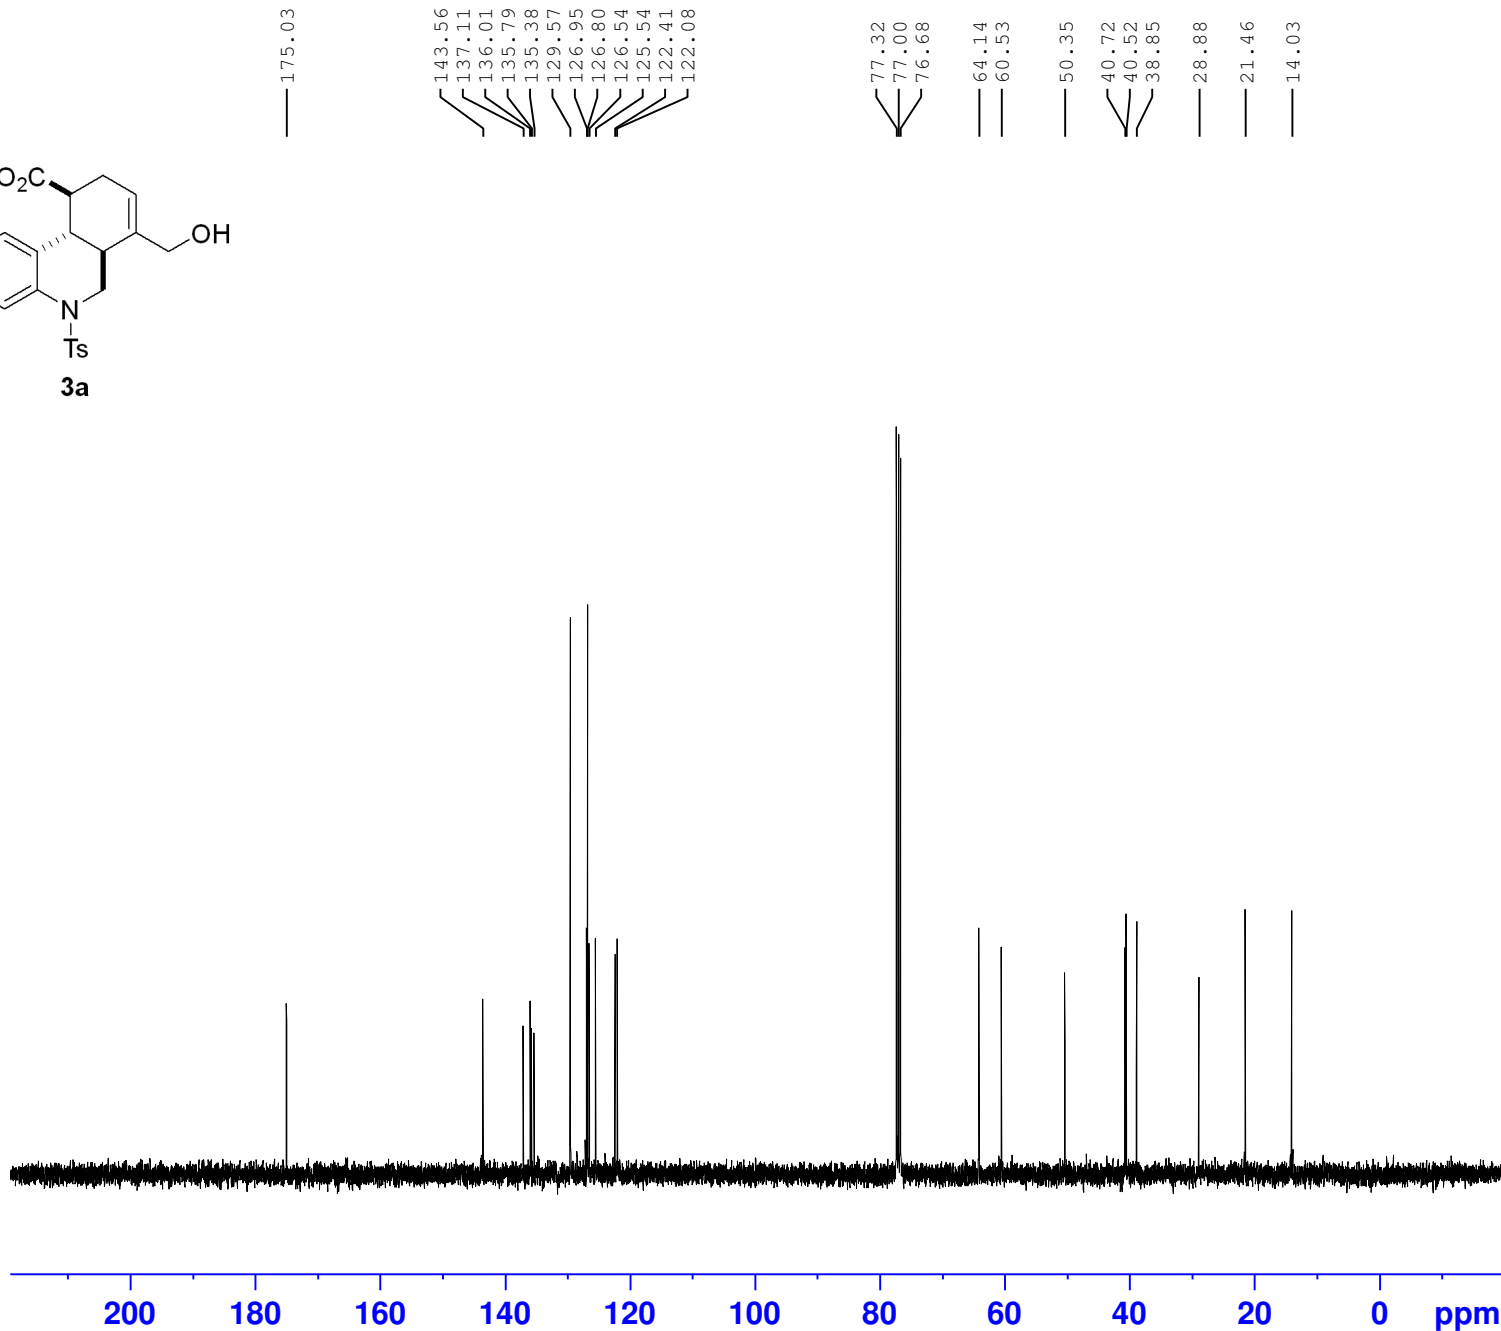

Current Data Parameters  
NAME YZK-2-52  
EXPNO 54  
PROCNO 1

F2 - Acquisition Parameters  
Date\_ 20211111  
Time 19.59  
INSTRUM spect  
PROBHD 5 mm PABBO BB-  
PULPROG zgpg30  
TD 65536  
SOLVENT CDC13  
NS 57  
DS 4  
SWH 24038.461 Hz  
FIDRES 0.366798 Hz  
AQ 1.3631488 sec  
RG 193.13  
DW 20.800 usec  
DE 6.50 usec  
TE 293.9 K  
D1 2.00000000 sec  
D11 0.03000000 sec  
TD0 1

==== CHANNEL f1 =====  
NUC1 13C  
P1 9.90 usec  
PLW1 53.00000000 W  
SFO1 100.6379178 MHz

==== CHANNEL f2 =====  
CPDPRG[2] waltz16  
NUC2 1H  
PCPD2 90.00 usec  
PLW2 14.00000000 W  
PLW12 0.35839999 W  
PLW13 0.29030001 W  
SFO2 400.1916008 MHz

F2 - Processing parameters  
SI 32768  
SF 100.6278682 MHz  
WDW EM  
SSB 0  
LB 1.00 Hz  
GB 0  
PC 1.40

4sunjianwei8/207 YZK-2-74-fr

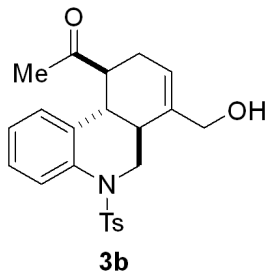

7.73  
7.71  
7.42  
7.40  
7.27  
7.26  
7.25  
7.23  
7.20  
7.18  
7.10  
7.07  
7.07  
6.67  
6.65  
5.75  
5.73  
4.10  
4.06  
4.05  
4.03  
4.02  
4.00  
3.48  
3.45  
3.42  
2.72  
2.71  
2.69  
2.68  
2.66  
2.65  
2.34  
2.31  
2.30  
2.28  
2.27  
2.25  
2.18  
2.16  
2.03  
1.92  
1.88  
1.81  
1.78  
1.75

Current Data Parameters  
NAME YZK-2-74  
EXPNO 207  
PROCNO 1

F2 - Acquisition Parameters  
Date\_ 20210908  
Time 14.54  
INSTRUM spect  
PROBHD 5 mm PABBO BB-  
PULPROG zg30  
TD 65536  
SOLVENT CDC13  
NS 6  
DS 2  
SWH 8223.685 Hz  
FIDRES 0.125483 Hz  
AQ 3.9845889 sec  
RG 68.24  
DW 60.800 usec  
DE 6.50 usec  
TE 294.7 K  
D1 1.00000000 sec  
TD0 1

==== CHANNEL f1 =====  
NUC1 1H  
P1 14.40 usec  
PLW1 14.00000000 W  
SFO1 400.1924713 MHz

F2 - Processing parameters  
SI 65536  
SF 400.1900173 MHz  
WDW EM  
SSB 0  
LB 0.30 Hz  
GB 0  
PC 1.00

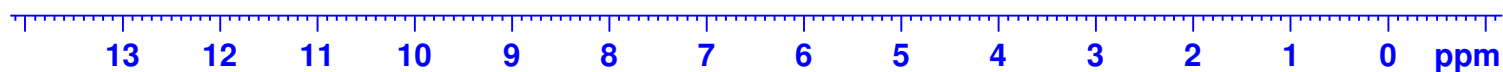

1.02  
2.07  
3.32  
1.01  
1.02  
1.00  
3.12  
1.03  
1.02  
4.17  
1.11  
2.11  
3.08  
2.13

4sunjianwei8/208 YZK-2-74-fr

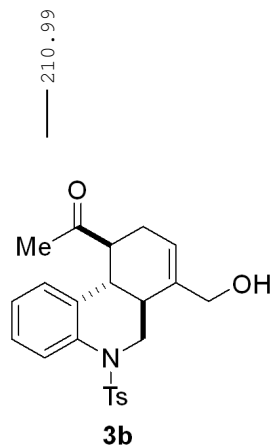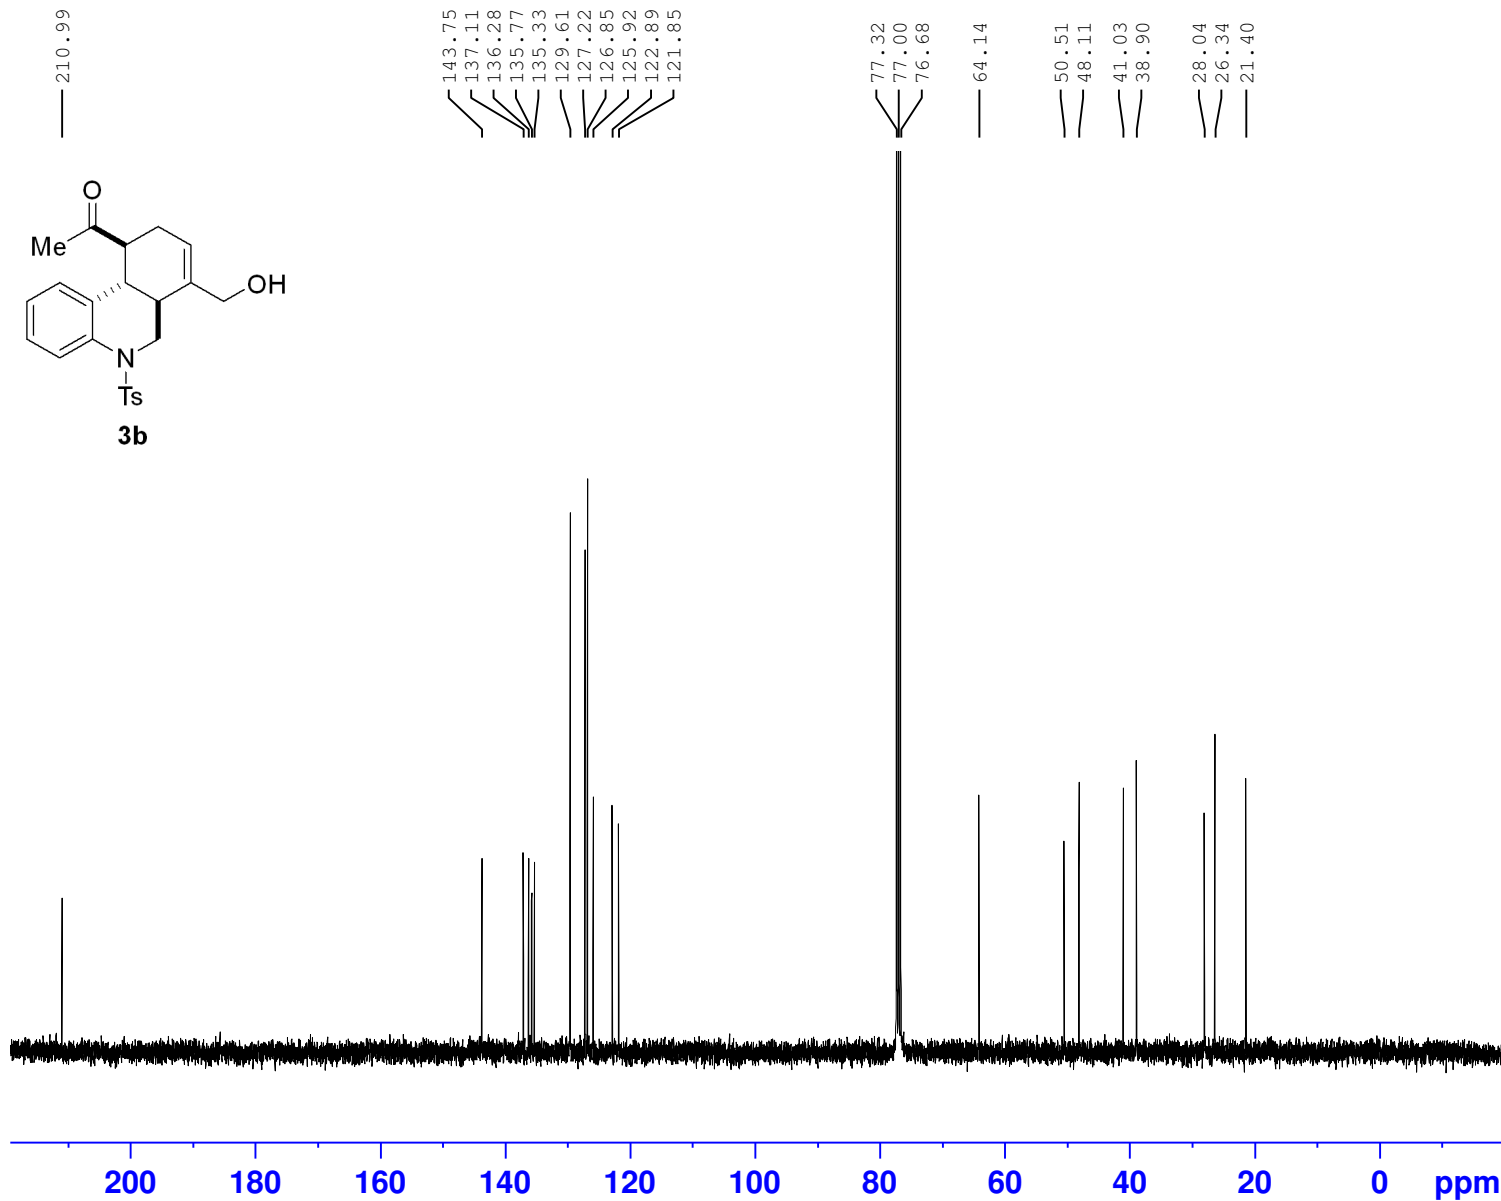

Current Data Parameters  
NAME 3b-yzk-2-74-C  
EXPNO 1  
PROCNO 1

F2 - Acquisition Parameters  
Date\_ 20210908  
Time 15.20  
INSTRUM spect  
PROBHD 5 mm PABBO BB-  
PULPROG zgpg30  
TD 65536  
SOLVENT CDC13  
NS 432  
DS 4  
SWH 24038.461 Hz  
FIDRES 0.366798 Hz  
AQ 1.3631488 sec  
RG 193.13  
DW 20.800 usec  
DE 6.50 usec  
TE 295.5 K  
D1 2.00000000 sec  
D11 0.03000000 sec  
TD0 1

==== CHANNEL f1 =====  
NUC1 13C  
P1 9.90 usec  
PLW1 53.00000000 W  
SFO1 100.6379178 MHz

==== CHANNEL f2 =====  
CPDPRG[2] waltz16  
NUC2 1H  
PCPD2 90.00 usec  
PLW2 14.00000000 W  
PLW12 0.35839999 W  
PLW13 0.29030001 W  
SFO2 400.1916008 MHz

F2 - Processing parameters  
SI 32768  
SF 100.6278661 MHz  
WDW EM  
SSB 0  
LB 1.00 Hz  
GB 0  
PC 1.40

Yzk-3-21-fr

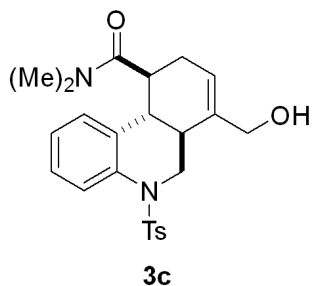

7.32  
7.32  
7.30  
7.30  
7.18  
7.16  
7.00  
6.98  
6.88  
6.88  
6.86  
6.84  
6.84  
6.75  
6.73  
6.73  
6.71  
6.71  
6.45  
6.43  
5.39  
5.38  
3.75  
3.74  
3.73  
3.72  
3.71  
3.66  
3.65  
3.63  
3.61  
3.55  
3.54  
3.52  
3.09  
3.06  
3.06  
3.03  
2.91  
2.59  
2.55  
2.05  
2.02  
2.01  
1.99  
1.97  
1.95  
1.94  
1.90  
1.88

Current Data Parameters  
NAME 3c-yzk-3-21-H  
EXPNO 1  
PROCNO 1

F2 - Acquisition Parameters  
Date\_ 20211111  
Time 20.14  
INSTRUM spect  
PROBHD 5 mm PABBO BB-  
PULPROG zg30  
TD 65536  
SOLVENT Acetone  
NS 16  
DS 2  
SWH 8223.685 Hz  
FIDRES 0.125483 Hz  
AQ 3.9845889 sec  
RG 113.67  
DW 60.800 usec  
DE 6.50 usec  
TE 293.4 K  
D1 1.00000000 sec  
TD0 1

==== CHANNEL f1 =====  
NUC1 1H  
P1 14.40 usec  
PLW1 14.00000000 W  
SFO1 400.1924713 MHz

F2 - Processing parameters  
SI 65536  
SF 400.1901467 MHz  
WDW EM  
SSB 0  
LB 0.30 Hz  
GB 0  
PC 1.00

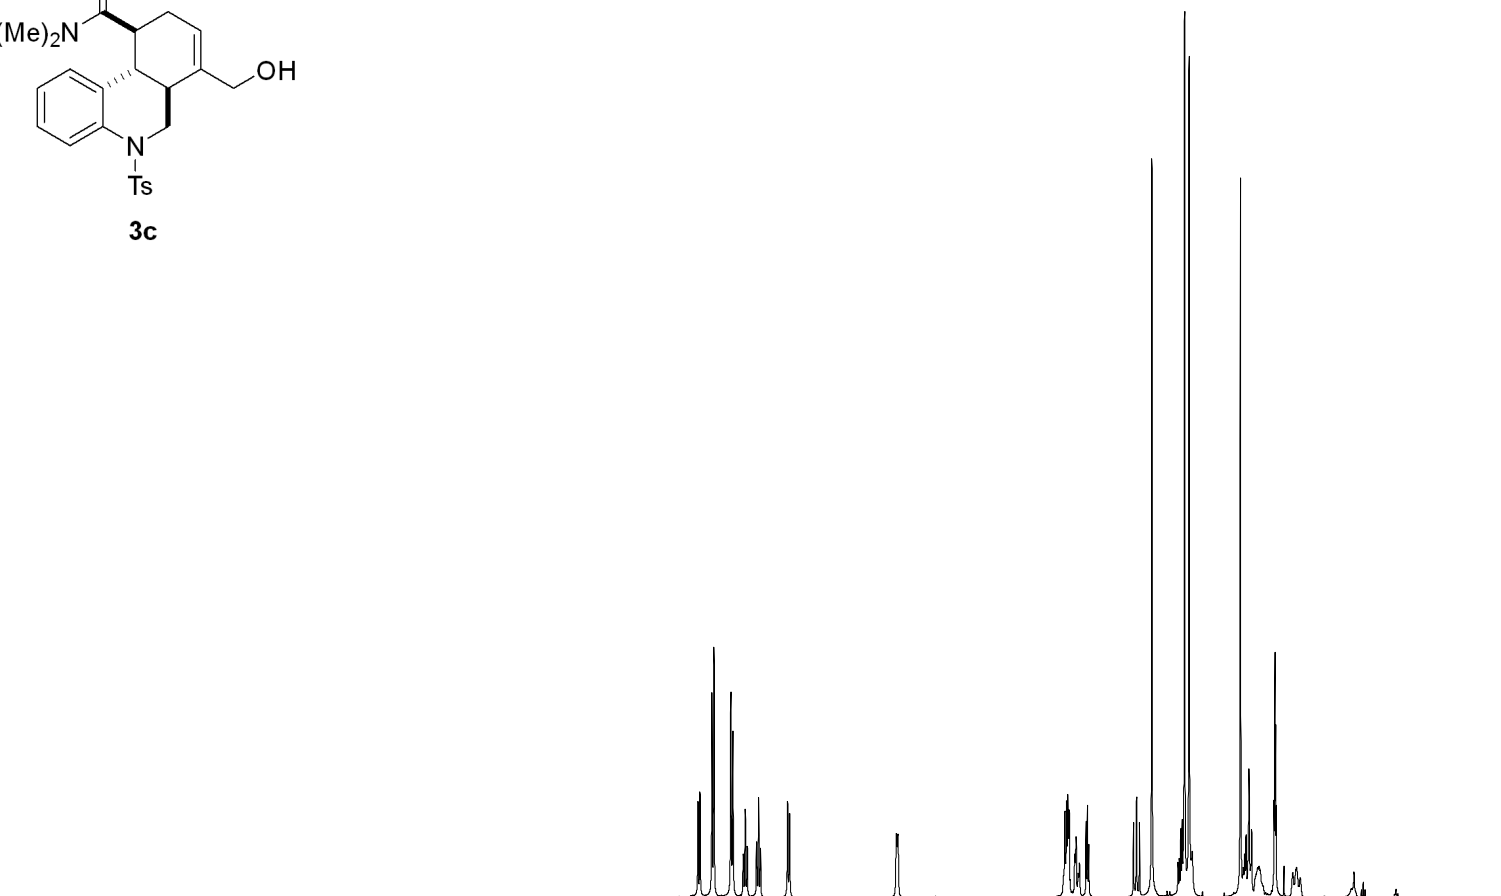

13 12 11 10 9 8 7 6 5 4 3 2 1 ppm

1.04  
2.01  
2.03  
1.02  
1.01  
1.03  
1.00  
2.15  
1.05  
0.88  
1.09  
2.92  
4.24  
3.22  
1.17  
1.94  
1.09

Yzk-3-21-fr

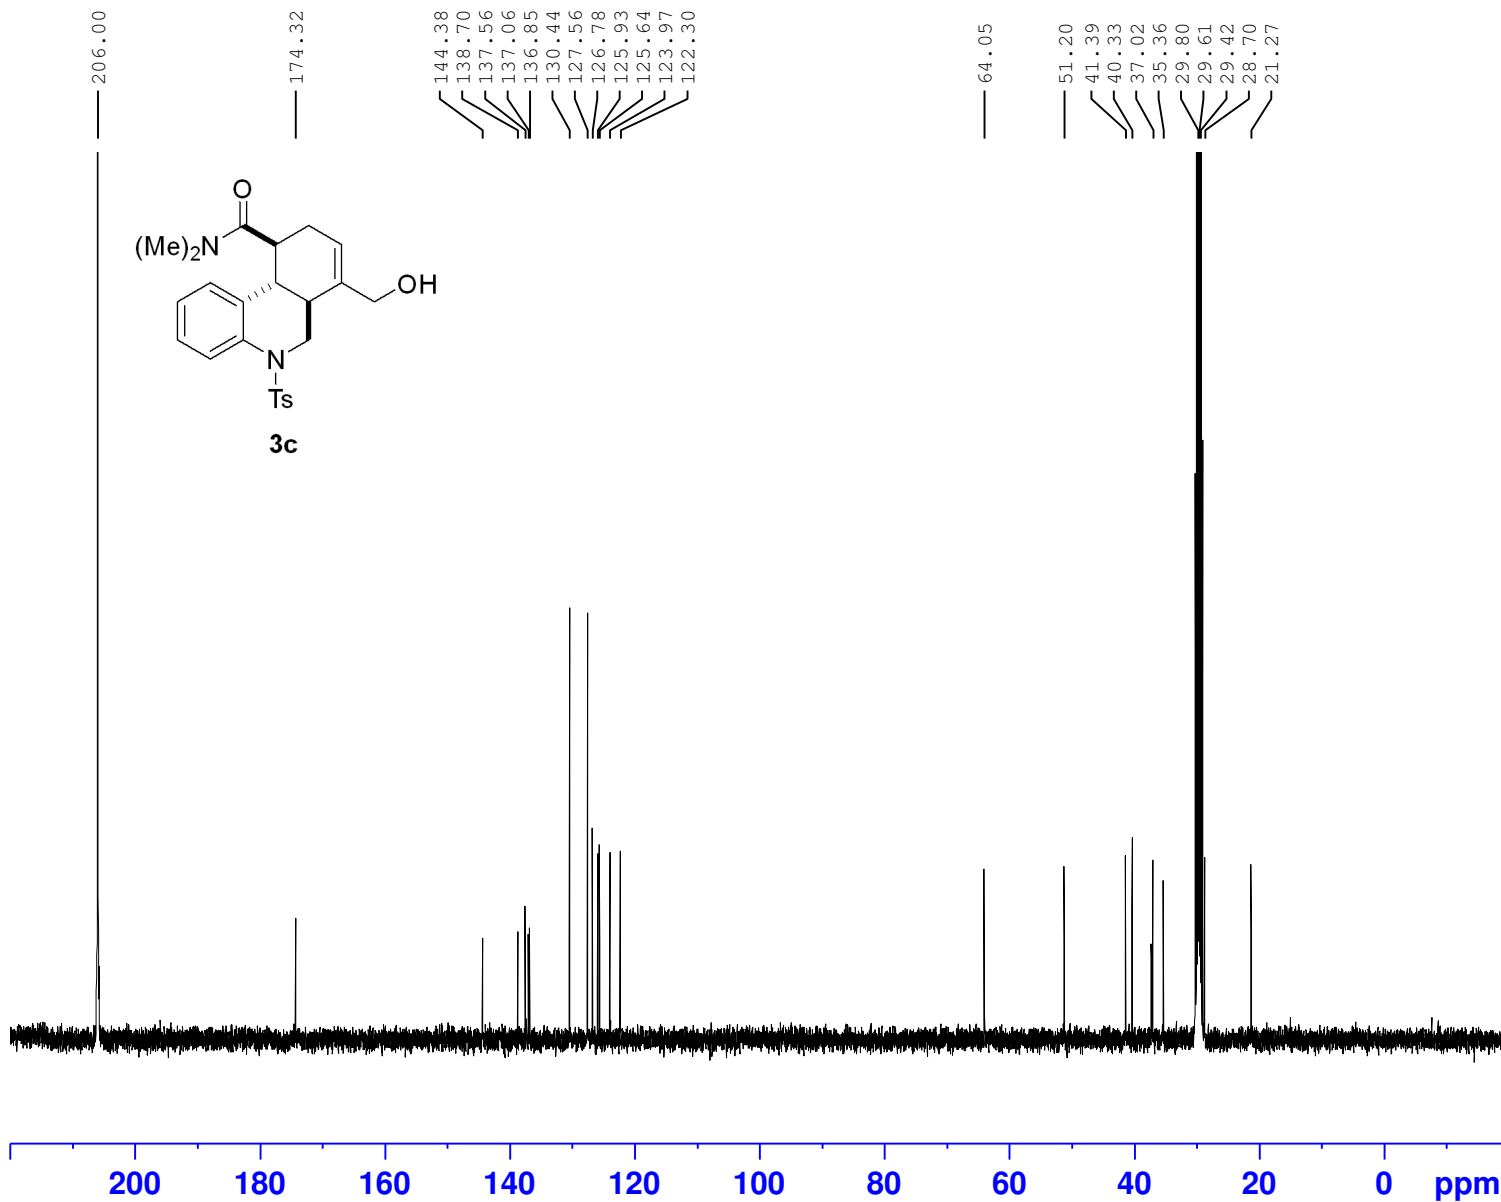

Current Data Parameters  
NAME 3-21  
EXPNO 58  
PROCNO 1

F2 - Acquisition Parameters  
Date\_ 20211111  
Time 20.19  
INSTRUM spect  
PROBHD 5 mm PABBO BB-  
PULPROG zgpg30  
TD 65536  
SOLVENT Acetone  
NS 280  
DS 4  
SWH 24038.461 Hz  
FIDRES 0.366798 Hz  
AQ 1.3631488 sec  
RG 193.13  
DW 20.800 usec  
DE 6.50 usec  
TE 294.0 K  
D1 2.00000000 sec  
D11 0.03000000 sec  
TD0 1

==== CHANNEL f1 =====  
NUC1 13C  
P1 9.90 usec  
PLW1 53.00000000 W  
SFO1 100.6379178 MHz

==== CHANNEL f2 =====  
CPDPRG[2] waltz16  
NUC2 1H  
PCPD2 90.00 usec  
PLW2 14.00000000 W  
PLW12 0.35839999 W  
PLW13 0.29030001 W  
SFO2 400.1916008 MHz

F2 - Processing parameters  
SI 32768  
SF 100.6277928 MHz  
WDW EM  
SSB 0  
LB 1.00 Hz  
GB 0  
PC 1.40

3sjwei 5215 yzk-2-58-fr 1h cdcl3

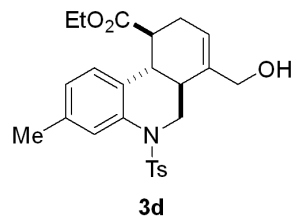

7.55  
7.46  
7.44  
7.26  
7.21  
7.18  
6.92  
6.89  
6.79  
6.76  
5.73  
5.71  
4.13  
4.12  
4.11  
4.09  
4.06  
4.05  
4.02  
4.01  
3.99  
3.42  
3.38  
3.34  
2.62  
2.61  
2.59  
2.57  
2.55  
2.53  
2.44  
2.42  
2.40  
2.37  
2.35  
2.33  
2.31  
2.17  
2.16  
2.14  
2.12  
2.10  
2.03  
2.01  
2.00  
1.96  
1.95

Current Data Parameters  
NAME 3f-zyk-2-58-H  
EXPNO 1  
PROCNO 1

F2 - Acquisition Parameters  
Date\_ 20210904  
Time 10.58  
INSTRUM spect  
PROBHD 5 mm PABBO BB-  
PULPROG zg30  
TD 65536  
SOLVENT CDC13  
NS 16  
DS 2  
SWH 6009.615 Hz  
FIDRES 0.091699 Hz  
AQ 5.4525952 sec  
RG 90.5  
DW 83.200 usec  
DE 6.50 usec  
TE -59.1 K  
D1 1.00000000 sec  
TD0 1

==== CHANNEL f1 =====  
SFO1 300.1318534 MHz  
NUC1 1H  
P1 10.00 usec  
PLW1 14.00000000 W

F2 - Processing parameters  
SI 65536  
SF 300.1300073 MHz  
WDW EM  
SSB 0  
LB 0.30 Hz  
GB 0  
PC 1.00

13 12 11 10 9 8 7 6 5 4 3 2 1 0 ppm

1.01  
2.03  
2.09  
1.01  
1.02  
1.00  
5.16  
1.02  
1.07  
4.10  
3.10  
1.15  
2.17  
1.31  
3.10

3sjwei 5216 yzk-2-58-fr 13ccdcl3

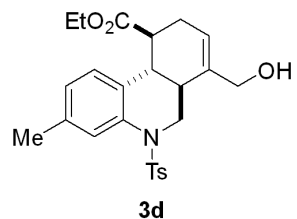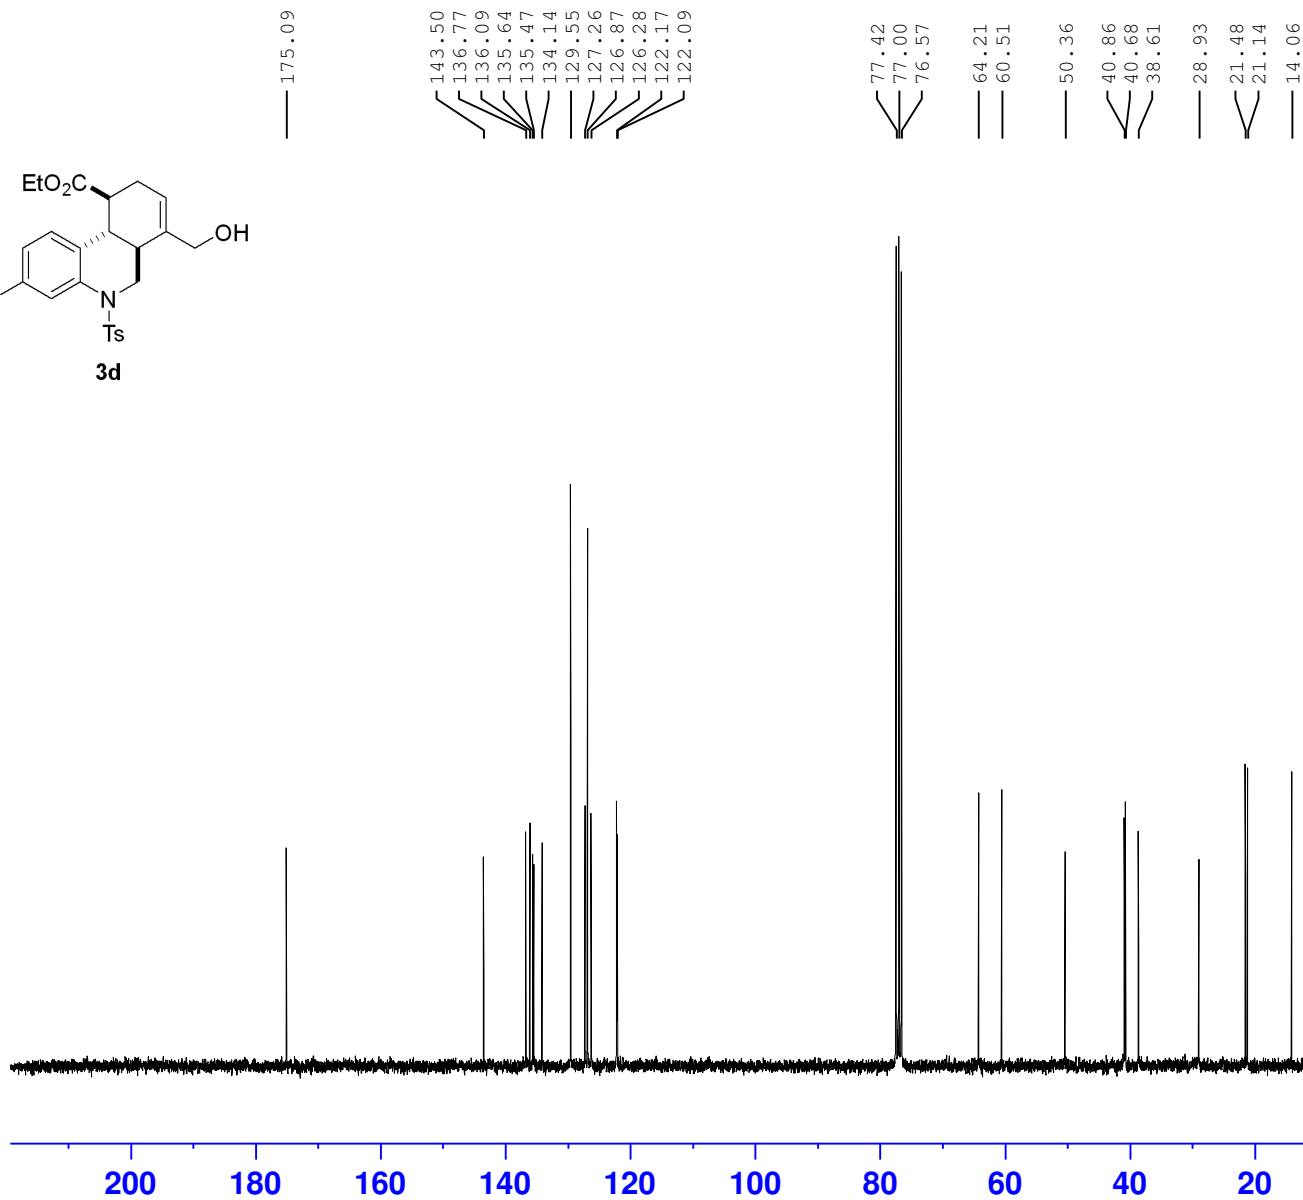

Current Data Parameters  
NAME 3f-yzk-2-58-C  
EXPNO 1  
PROCNO 1

F2 - Acquisition Parameters  
Date\_ 20210904  
Time 11.38  
INSTRUM spect  
PROBHD 5 mm PABBO BB-  
PULPROG zgpg30  
TD 65536  
SOLVENT CDCl<sub>3</sub>  
NS 600  
DS 4  
SWH 18028.846 Hz  
FIDRES 0.275098 Hz  
AQ 1.8175317 sec  
RG 203  
DW 27.733 usec  
DE 6.50 usec  
TE -59.1 K  
D1 2.0000000 sec  
D11 0.0300000 sec  
TD0 1

==== CHANNEL f1 =====  
SFO1 75.4752949 MHz  
NUC1 13C  
P1 9.50 usec  
PLW1 34.20000076 W

==== CHANNEL f2 =====  
SFO2 300.1312005 MHz  
NUC2 1H  
CPDPRG[2] waltz16  
PCPD2 90.00 usec  
PLW2 14.00000000 W  
PLW12 0.17284000 W  
PLW13 0.14000000 W

F2 - Processing parameters  
SI 32768  
SF 75.4677545 MHz  
WDW EM  
SSB 0  
LB 1.00 Hz  
GB 0  
PC 1.40



3sjwei 5321 yzk-2-81-fr 1h cdcl3

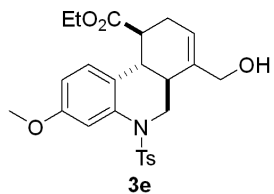

7.46  
7.43  
7.31  
7.30  
7.26  
7.20  
7.17  
6.78  
6.75  
6.63  
6.63  
6.61  
6.60  
5.71  
5.69  
4.09  
4.07  
4.04  
4.03  
4.00  
3.77  
3.40  
3.36  
3.32  
2.56  
2.54  
2.40  
2.35  
2.33  
2.14  
2.01  
2.00  
1.95  
1.87  
1.84  
1.80  
1.18  
1.15  
1.13  
-0.02

Current Data Parameters  
NAME YZK-2-81  
EXPNO 5321  
PROCNO 1

F2 - Acquisition Parameters  
Date\_ 20210914  
Time 9.21  
INSTRUM spect  
PROBHD 5 mm PABBO BB-  
PULPROG zg30  
TD 65536  
SOLVENT CDC13  
NS 16  
DS 2  
SWH 6009.615 Hz  
FIDRES 0.091699 Hz  
AQ 5.4525952 sec  
RG 32  
DW 83.200 usec  
DE 6.50 usec  
TE -59.1 K  
D1 1.00000000 sec  
TD0 1

==== CHANNEL f1 =====  
SFO1 300.1318534 MHz  
NUC1 1H  
P1 10.00 usec  
PLW1 14.00000000 W

F2 - Processing parameters  
SI 65536  
SF 300.1300071 MHz  
WDW EM  
SSB 0  
LB 0.30 Hz  
GB 0  
PC 1.00

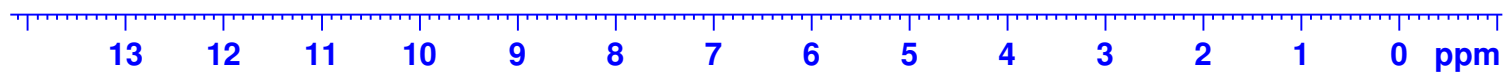

2.22  
1.00  
2.23  
1.01  
0.99  
0.10  
1.00  
5.10  
3.33  
1.03  
1.06  
4.80  
2.79  
1.19  
1.06  
3.07

3sjwei 5418yzk-2-81-fr 13c cdcl3

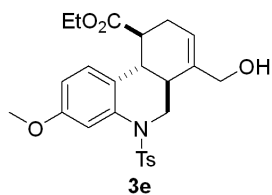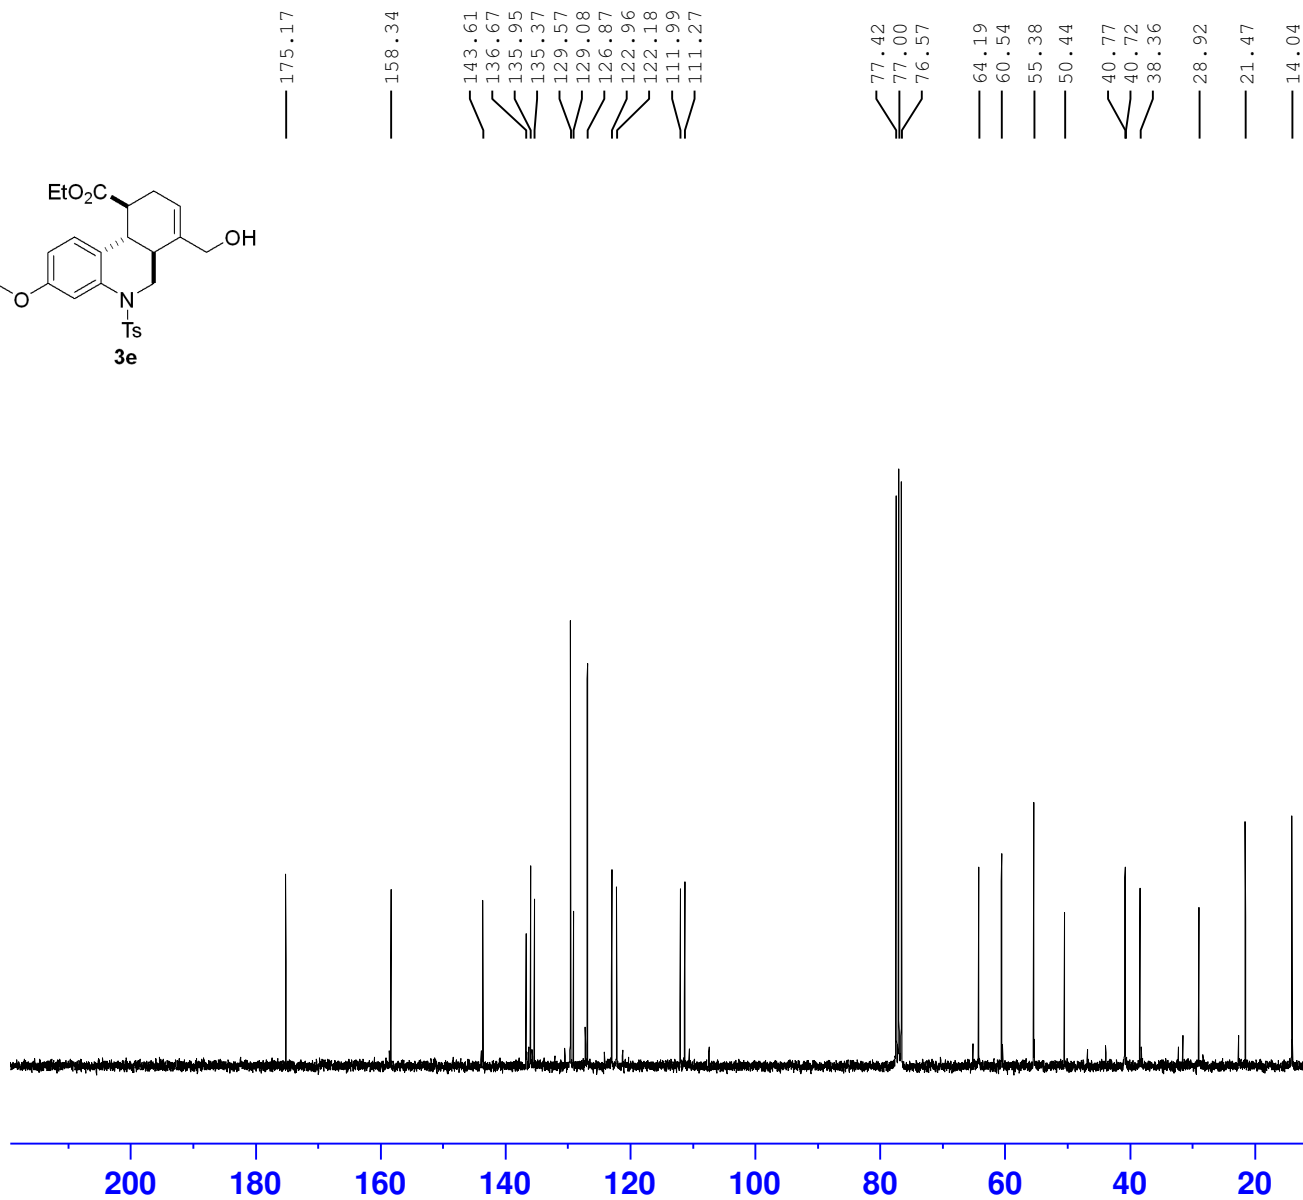

Current Data Parameters  
NAME 3g-yzk-2-81-C  
EXPNO 1  
PROCNO 1

F2 - Acquisition Parameters  
Date\_ 20210925  
Time 10.36  
INSTRUM spect  
PROBHD 5 mm PABBO BB-  
PULPROG zgpg30  
TD 65536  
SOLVENT CDC13  
NS 500  
DS 4  
SWH 18028.846 Hz  
FIDRES 0.275098 Hz  
AQ 1.8175317 sec  
RG 203  
DW 27.733 usec  
DE 6.50 usec  
TE -59.1 K  
D1 2.00000000 sec  
D11 0.03000000 sec  
TD0 1

=====  
CHANNEL f1  
SFO1 75.4752949 MHz  
NUC1 13C  
P1 9.50 usec  
PLW1 34.20000076 W

=====  
CHANNEL f2  
SFO2 300.1312005 MHz  
NUC2 1H  
CPDPRG[2] waltz16  
PCPD2 90.00 usec  
PLW2 14.00000000 W  
PLW12 0.17284000 W  
PLW13 0.14000000 W

F2 - Processing parameters  
SI 32768  
SF 75.4677552 MHz  
WDW EM  
SSB 0  
LB 1.00 Hz  
GB 0  
PC 1.40

3sjwei 5304 yzk-2-80-fr 1h cdcl3

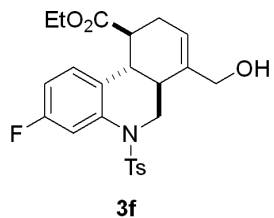

7.53  
7.52  
7.50  
7.50  
7.49  
7.47  
7.26  
7.23  
7.21  
6.87  
6.85  
6.84  
6.82  
6.81  
6.80  
6.79  
6.78  
6.76  
6.75  
5.76  
5.74  
4.14  
4.12  
4.09  
4.08  
4.07  
4.06  
4.04  
4.02  
4.00  
3.43  
3.39  
3.36  
2.65  
2.63  
2.61  
2.60  
2.58  
2.56  
2.48  
2.46  
2.42  
2.40  
2.38  
2.21  
2.20  
2.18  
2.06  
2.03  
2.01  
2.01  
2.00

Current Data Parameters  
NAME YZK-2-80  
EXPNO 5304  
PROCNO 1

F2 - Acquisition Parameters  
Date\_ 20210910  
Time 9.20  
INSTRUM spect  
PROBHD 5 mm PABBO BB-  
PULPROG zg30  
TD 65536  
SOLVENT CDC13  
NS 16  
DS 2  
SWH 6009.615 Hz  
FIDRES 0.091699 Hz  
AQ 5.4525952 sec  
RG 114  
DW 83.200 usec  
DE 6.50 usec  
TE -59.1 K  
D1 1.00000000 sec  
TD0 1

==== CHANNEL f1 =====  
SFO1 300.1318534 MHz  
NUC1 1H  
P1 10.00 usec  
PLW1 14.00000000 W

F2 - Processing parameters  
SI 65536  
SF 300.1300070 MHz  
WDW EM  
SSB 0  
LB 0.30 Hz  
GB 0  
PC 1.00

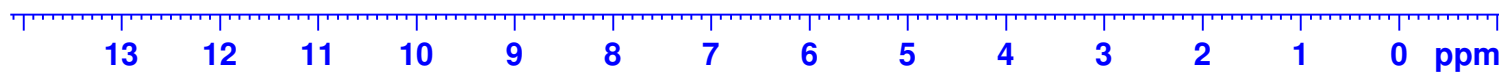

3.01  
2.05  
2.00  
1.00  
5.11  
1.01  
1.03  
4.17  
1.09  
2.08  
3.07

3sjwei 5317 yzk-2-80-fr 13c cdcl3

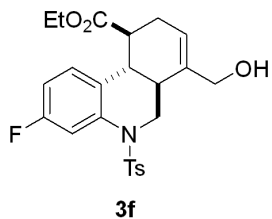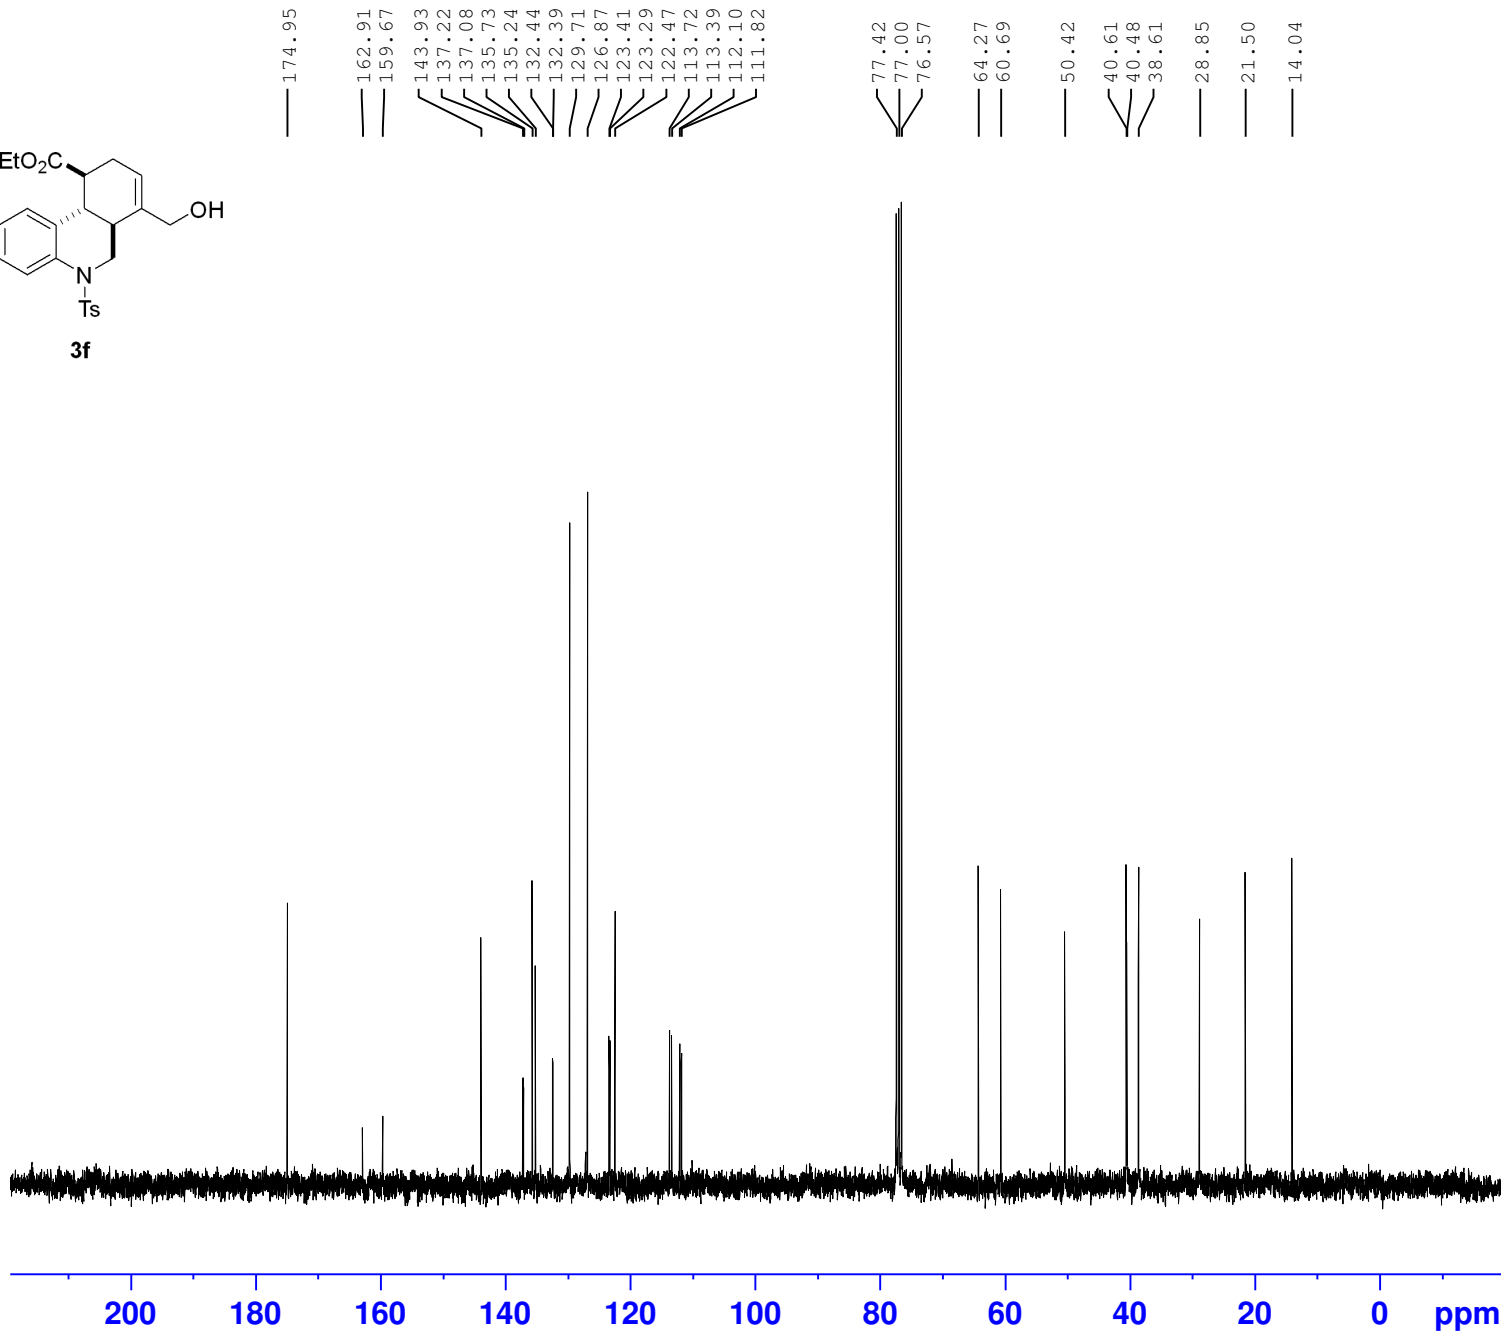

Current Data Parameters  
NAME 3h-zyk-2-80-C  
EXPNO 1  
PROCNO 1

F2 - Acquisition Parameters  
Date\_ 20210911  
Time 10.10  
INSTRUM spect  
PROBHD 5 mm PABBO BB-  
PULPROG zgpg30  
TD 65536  
SOLVENT CDCl3  
NS 500  
DS 4  
SWH 18028.846 Hz  
FIDRES 0.275098 Hz  
AQ 1.8175317 sec  
RG 203  
DW 27.733 usec  
DE 6.50 usec  
TE -59.1 K  
D1 2.00000000 sec  
D11 0.03000000 sec  
TD0 1

===== CHANNEL f1 =====  
SFO1 75.4752949 MHz  
NUC1 13C  
P1 9.50 usec  
PLW1 34.20000076 W

===== CHANNEL f2 =====  
SFO2 300.1312005 MHz  
NUC2 1H  
CPDPRG[2] waltz16  
PCPD2 90.00 usec  
PLW2 14.00000000 W  
PLW12 0.17284000 W  
PLW13 0.14000000 W

F2 - Processing parameters  
SI 32768  
SF 75.4677538 MHz  
WDW EM  
SSB 0  
LB 1.00 Hz  
GB 0  
PC 1.40

3sjwei 5305 yzk-2-80-fr 19f cdcl3

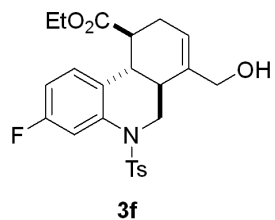

-114.39

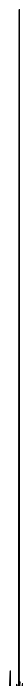

Current Data Parameters  
NAME workup  
EXPNO 5305  
PROCNO 1

F2 - Acquisition Parameters  
Date\_ 20210910  
Time 9.23  
INSTRUM spect  
PROBHD 5 mm PABBO BB-  
PULPROG zgfhigqn.2  
TD 131072  
SOLVENT CDC13  
NS 16  
DS 4  
SWH 66964.289 Hz  
FIDRES 0.510897 Hz  
AQ 0.9786710 sec  
RG 203  
DW 7.467 usec  
DE 6.50 usec  
TE -59.1 K  
D1 1.00000000 sec  
D11 0.03000000 sec  
D12 0.00002000 sec  
TD0 1

==== CHANNEL f1 =====  
SFO1 282.3761148 MHz  
NUC1 19F  
P1 14.50 usec  
PLW1 10.39999962 W

==== CHANNEL f2 =====  
SFO2 300.1312005 MHz  
NUC2 1H  
CPDPRG[2] waltz16  
PCPD2 90.00 usec  
PLW2 14.00000000 W  
PLW12 0.17284000 W

F2 - Processing parameters  
SI 65536  
SF 282.4043552 MHz  
WDW EM  
SSB 0  
LB 0.30 Hz  
GB 0  
PC 1.00

0 -20 -40 -60 -80 -100 -120 -140 -160 -180

ppm

3sjwei 5164 yzk-2-68-fr 1h cdcl3

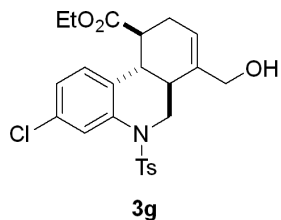

7.75  
7.75  
7.49  
7.47  
7.26  
7.23  
7.21  
7.08  
7.07  
7.05  
7.04  
6.83  
6.83  
6.80  
6.80  
5.75  
5.73  
4.13  
4.11  
4.09  
4.06  
4.04  
4.03  
4.00  
3.43  
3.39  
3.35  
3.35  
2.64  
2.62  
2.60  
2.58  
2.56  
2.54  
2.47  
2.45  
2.43  
2.41  
2.38  
2.19  
2.18  
2.16  
2.03  
1.99  
1.99  
1.98  
1.93  
1.89

Current Data Parameters  
NAME YZK-2-68  
EXPNO 5164  
PROCNO 1

F2 - Acquisition Parameters  
Date\_ 20210901  
Time 10.06  
INSTRUM spect  
PROBHD 5 mm PABBO BB-  
PULPROG zg30  
TD 65536  
SOLVENT CDC13  
NS 16  
DS 2  
SWH 6009.615 Hz  
FIDRES 0.091699 Hz  
AQ 5.4525952 sec  
RG 101  
DW 83.200 usec  
DE 6.50 usec  
TE -59.1 K  
D1 1.00000000 sec  
TD0 1

==== CHANNEL f1 =====  
SFO1 300.1318534 MHz  
NUC1 1H  
P1 10.00 usec  
PLW1 14.00000000 W

F2 - Processing parameters  
SI 65536  
SF 300.1300072 MHz  
WDW EM  
SSB 0  
LB 0.30 Hz  
GB 0  
PC 1.00

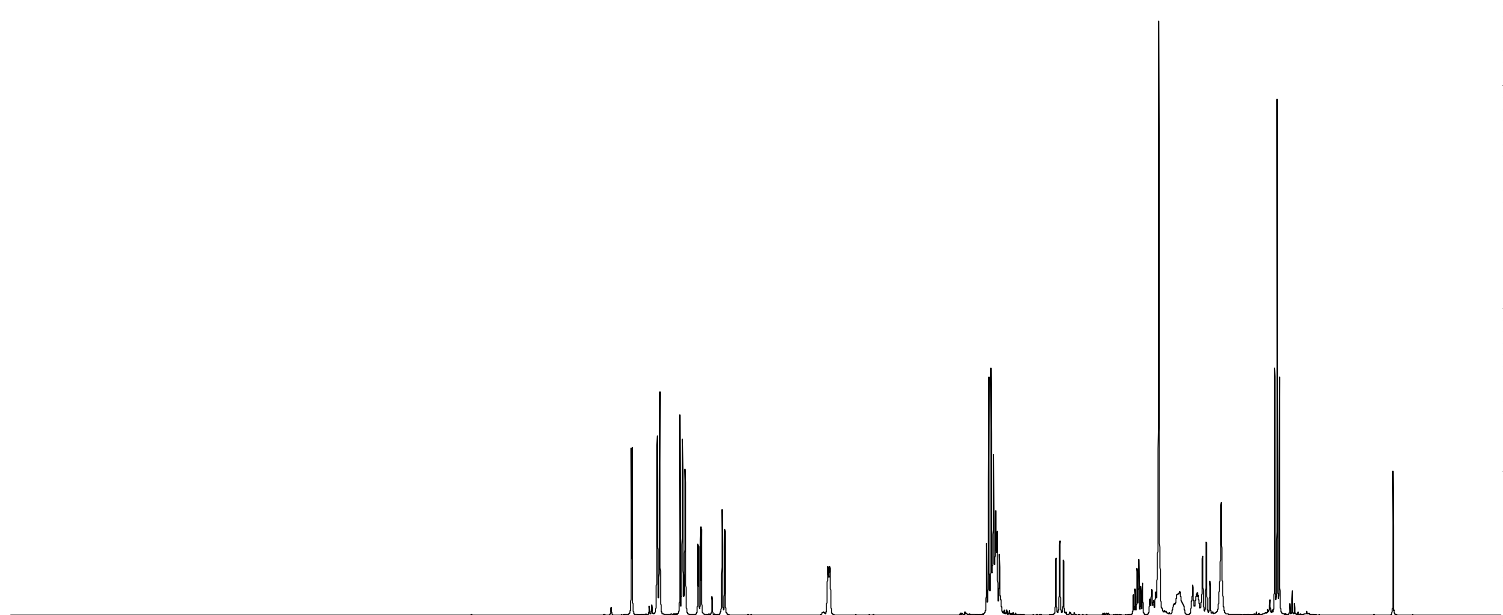

13 12 11 10 9 8 7 6 5 4 3 2 1 0 ppm

0.98  
2.01  
2.08  
0.99  
0.96  
1.00  
5.16  
1.01  
1.04  
4.23  
1.11  
2.10  
3.01

3sjwei 5165 yzk-2-68-fr 13c cdcl3

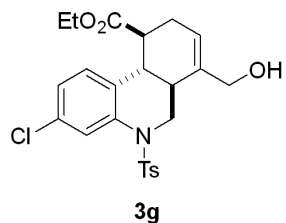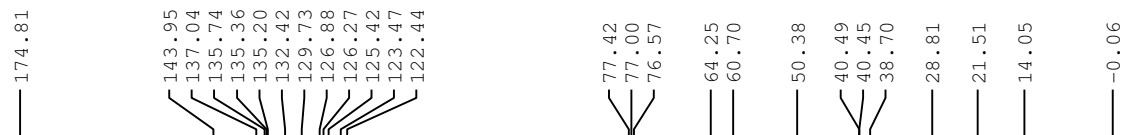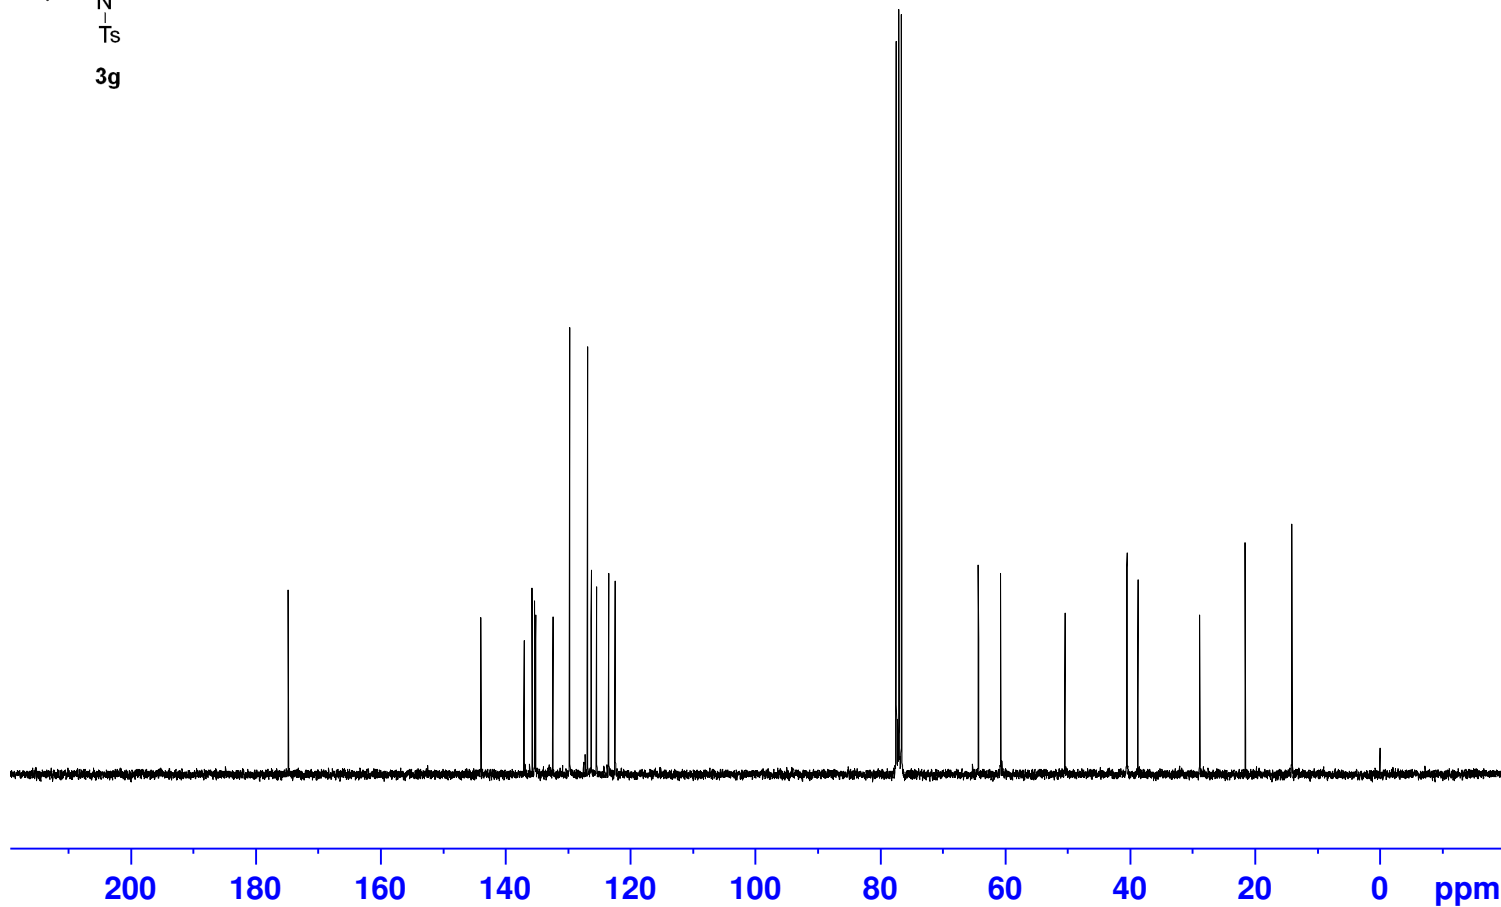

Current Data Parameters  
NAME 3i-zyk-2-68-C  
EXPNO 1  
PROCNO 1

F2 - Acquisition Parameters  
Date\_ 20210901  
Time 10.59  
INSTRUM spect  
PROBHD 5 mm PABBO BB-  
PULPROG zgpg30  
TD 65536  
SOLVENT CDCl3  
NS 800  
DS 4  
SWH 18028.846 Hz  
FIDRES 0.275098 Hz  
AQ 1.8175317 sec  
RG 203  
DW 27.733 usec  
DE 6.50 usec  
TE -59.1 K  
D1 2.0000000 sec  
D11 0.0300000 sec  
TD0 1

==== CHANNEL f1 =====  
SFO1 75.4752949 MHz  
NUC1 13C  
P1 9.50 usec  
PLW1 34.20000076 W

==== CHANNEL f2 =====  
SFO2 300.1312005 MHz  
NUC2 1H  
CPDPRG[2] waltz16  
PCPD2 90.00 usec  
PLW2 14.00000000 W  
PLW12 0.17284000 W  
PLW13 0.14000000 W

F2 - Processing parameters  
SI 32768  
SF 75.4677536 MHz  
WDW EM  
SSB 0  
LB 1.00 Hz  
GB 0  
PC 1.40

YZK-3-17-fr

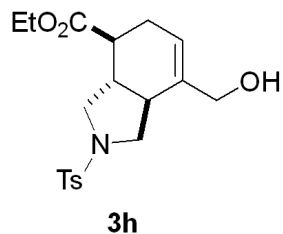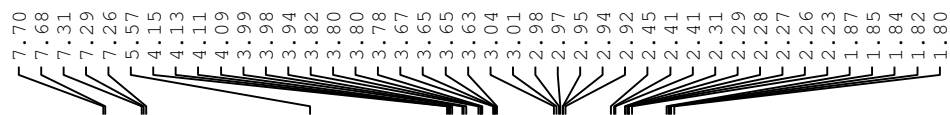

Current Data Parameters  
NAME 3-17  
EXPNO 7  
PROCNO 1

F2 - Acquisition Parameters  
Date\_ 20211020  
Time 10.16  
INSTRUM spect  
PROBHD 5 mm PABBO BB-  
PULPROG zg30  
TD 65536  
SOLVENT CDCl3  
NS 8  
DS 2  
SWH 8223.685 Hz  
FIDRES 0.125483 Hz  
AQ 3.9845889 sec  
RG 61.19  
DW 60.800 usec  
DE 6.50 usec  
TE 294.3 K  
D1 1.00000000 sec  
TD0 1

==== CHANNEL f1 =====  
NUC1 1H  
P1 14.40 usec  
PLW1 14.00000000 W  
SFO1 400.1924713 MHz

F2 - Processing parameters  
SI 65536  
SF 400.1900169 MHz  
WDW EM  
SSB 0  
LB 0.30 Hz  
GB 0  
PC 1.00

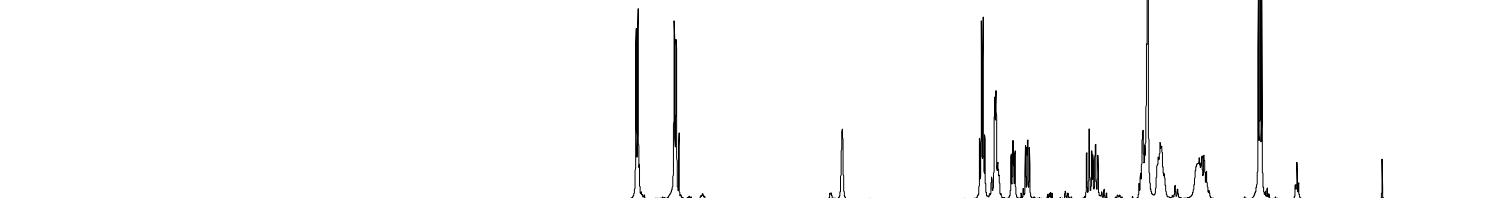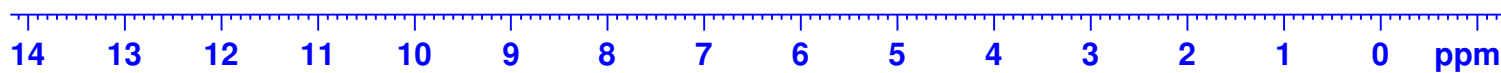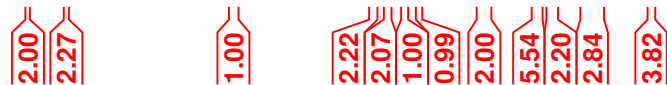



YZK-3-17-fr

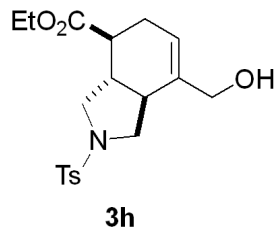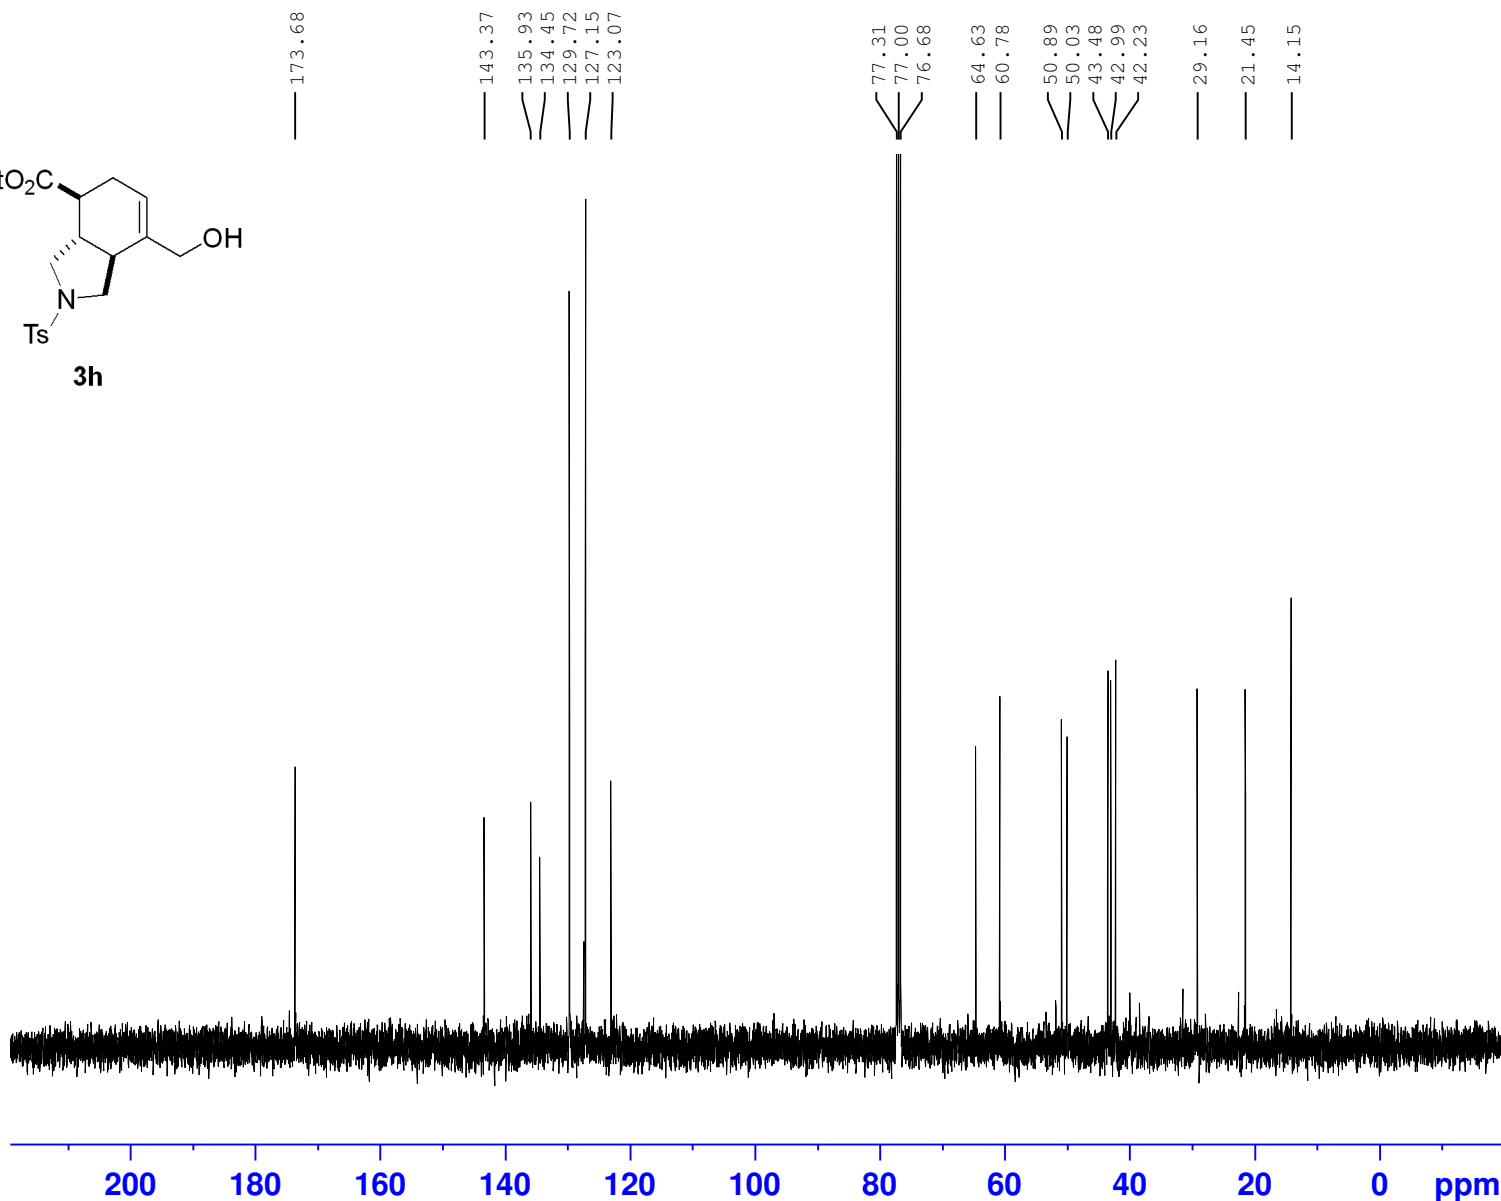

Current Data Parameters  
NAME 3j-yzk-3-17-C  
EXPNO 1  
PROCNO 1

F2 - Acquisition Parameters  
Date\_ 20211020  
Time 10.21  
INSTRUM spect  
PROBHD 5 mm PABBO BB-  
PULPROG zgpg30  
TD 65536  
SOLVENT CDCl3  
NS 66  
DS 4  
SWH 24038.461 Hz  
FIDRES 0.366798 Hz  
AQ 1.3631488 sec  
RG 193.13  
DW 20.800 usec  
DE 6.50 usec  
TE 295.0 K  
D1 2.00000000 sec  
D11 0.03000000 sec  
TD0 1

==== CHANNEL f1 =====  
NUC1 13C  
P1 9.90 usec  
PLW1 53.00000000 W  
SFO1 100.6379178 MHz

==== CHANNEL f2 =====  
CPDPRG[2] waltz16  
NUC2 1H  
PCPD2 90.00 usec  
PLW2 14.00000000 W  
PLW12 0.35839999 W  
PLW13 0.29030001 W  
SFO2 400.1916008 MHz

F2 - Processing parameters  
SI 32768  
SF 100.6278668 MHz  
WDW EM  
SSB 0  
LB 1.00 Hz  
GB 0  
PC 1.40

YZK-3-12-fr

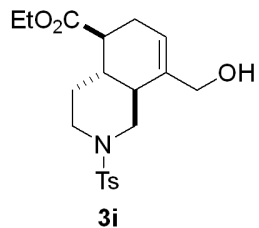

7.63  
7.61  
7.30  
7.28  
7.26  
5.70  
4.17  
4.15  
4.14  
4.13  
4.12  
4.11  
4.10  
4.08  
4.08  
4.07  
4.06  
4.01  
3.98  
3.86  
3.83  
2.40  
2.35  
2.34  
2.33  
2.31  
2.30  
2.28  
2.26  
2.25  
2.24  
2.23  
2.08  
2.04  
2.01  
1.98  
1.67  
1.66  
1.64  
1.43

Current Data Parameters  
NAME 3-12  
EXPNO 1  
PROCNO 1

F2 - Acquisition Parameters  
Date\_ 20211014  
Time 10.50  
INSTRUM spect  
PROBHD 5 mm PABBO BB-  
PULPROG zg30  
TD 65536  
SOLVENT CDC13  
NS 8  
DS 2  
SWH 8223.685 Hz  
FIDRES 0.125483 Hz  
AQ 3.9845889 sec  
RG 53.3  
DW 60.800 usec  
DE 6.50 usec  
TE 294.4 K  
D1 1.00000000 sec  
TD0 1

==== CHANNEL f1 =====  
NUC1 1H  
P1 14.40 usec  
PLW1 14.00000000 W  
SFO1 400.1924713 MHz

F2 - Processing parameters  
SI 65536  
SF 400.1900167 MHz  
WDW EM  
SSB 0  
LB 0.30 Hz  
GB 0  
PC 1.00

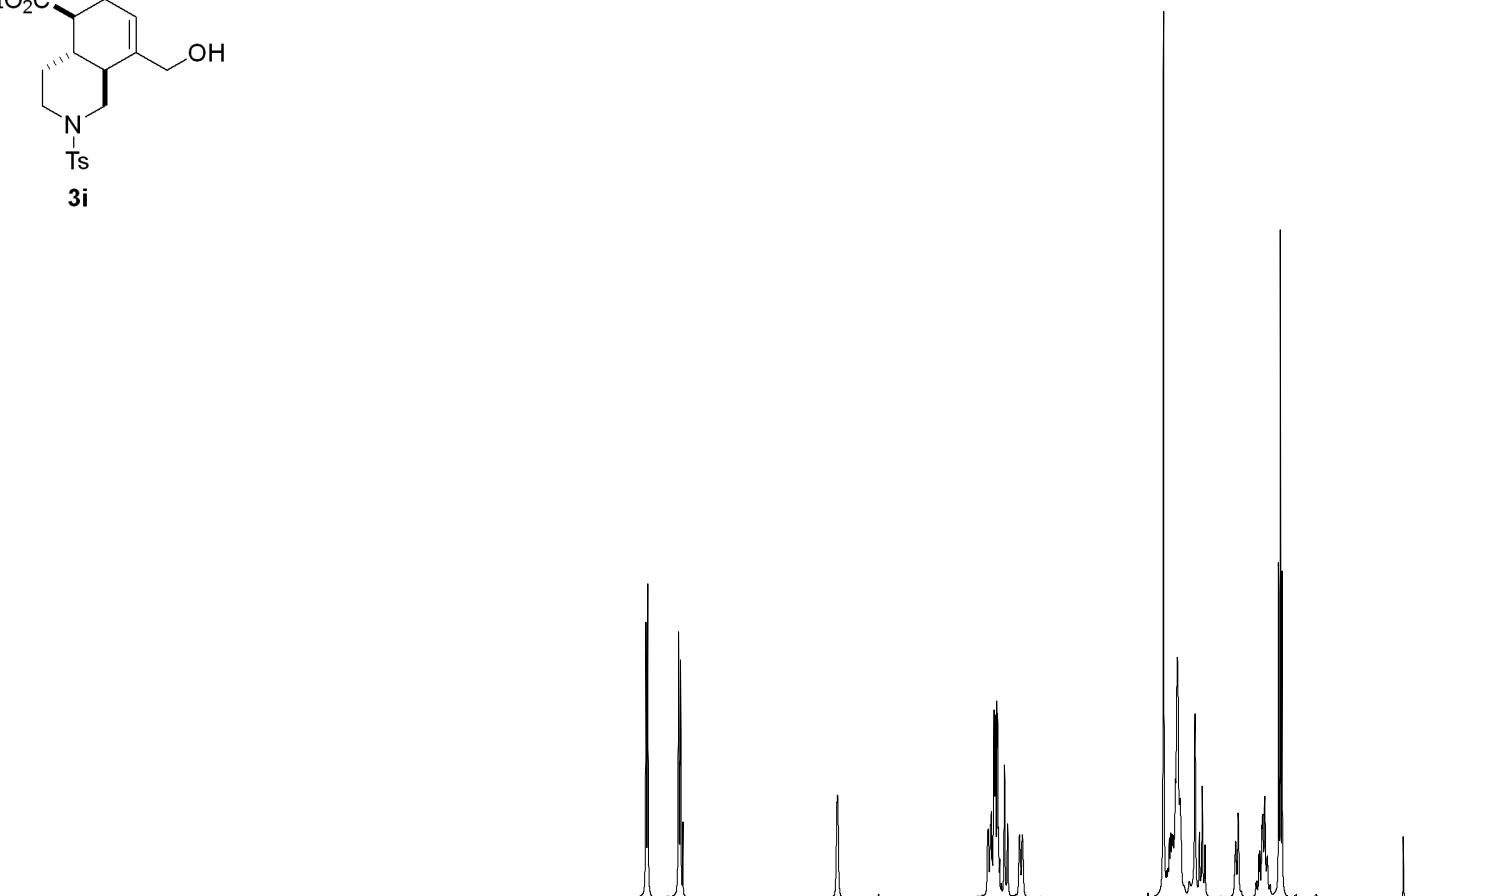

13 12 11 10 9 8 7 6 5 4 3 2 1 0 ppm

1.99  
1.97  
1.00  
4.09  
1.01  
1.00  
3.03  
5.13  
1.13  
1.04  
0.98  
2.06  
3.07

YZK-3-12-fr

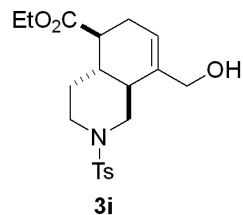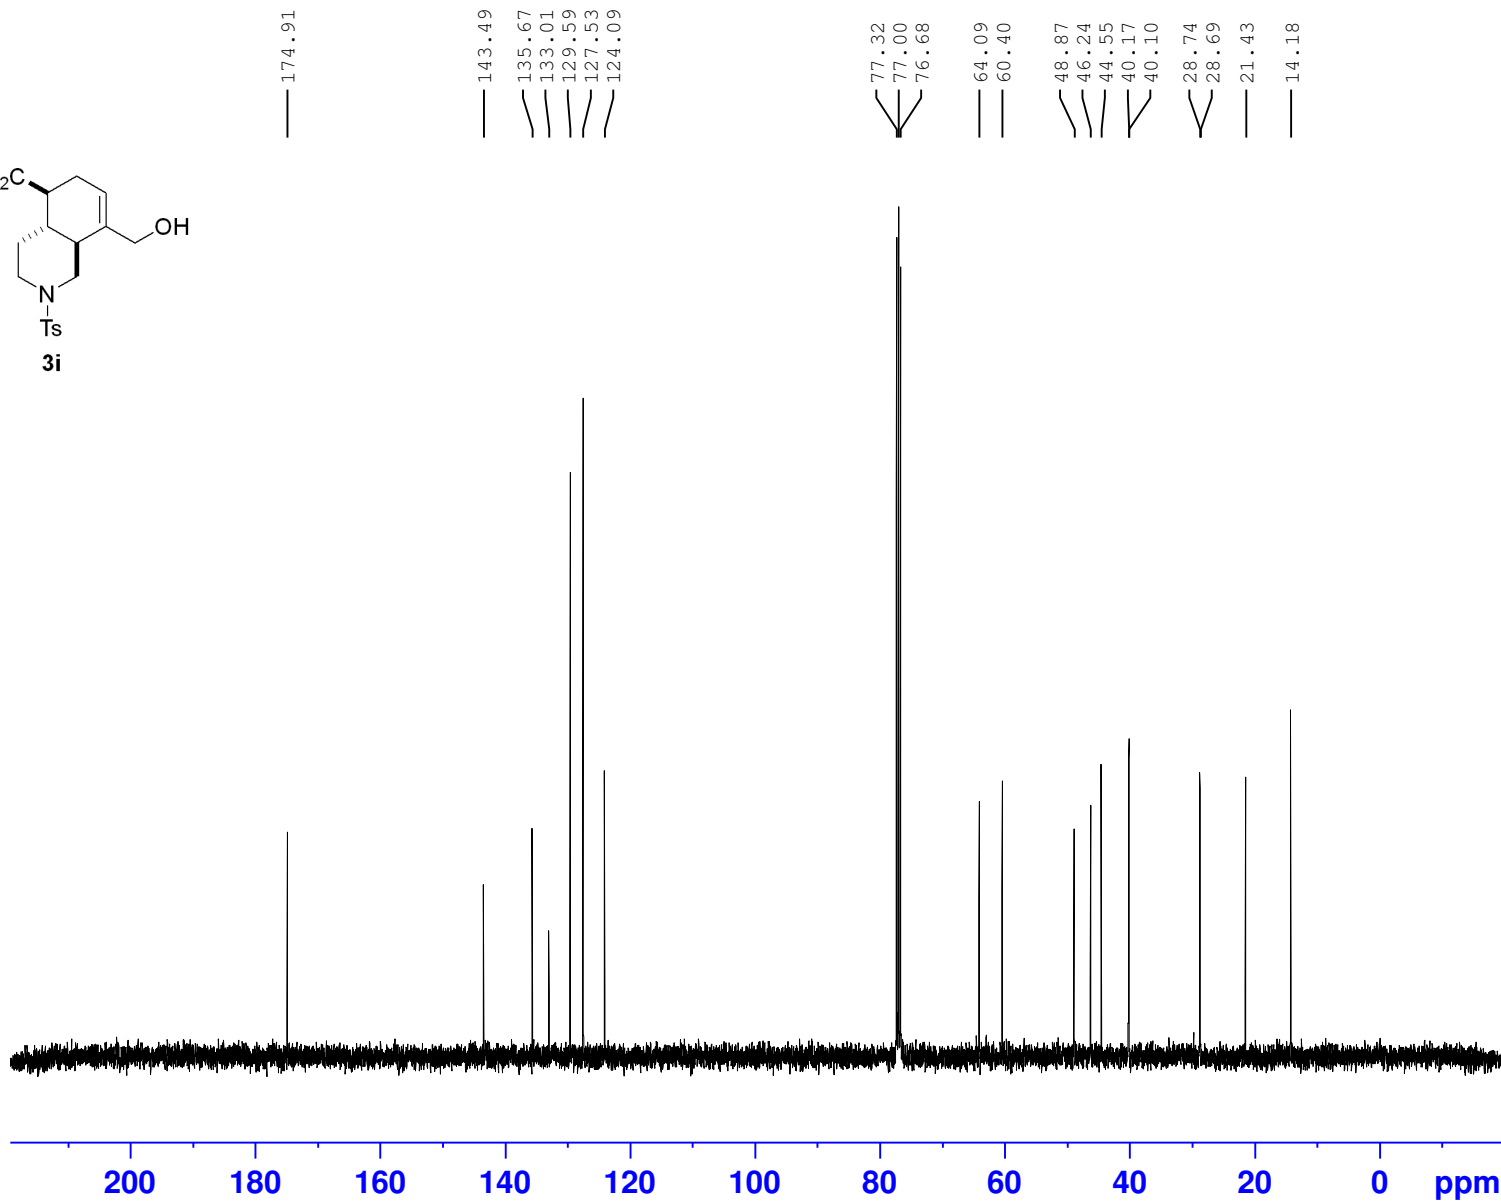

Current Data Parameters  
NAME 3-12  
EXPNO 2  
PROCNO 1

F2 - Acquisition Parameters  
Date\_ 20211014  
Time 10.54  
INSTRUM spect  
PROBHD 5 mm PABBO BB-  
PULPROG zgpg30  
TD 65536  
SOLVENT CDCl3  
NS 63  
DS 4  
SWH 24038.461 Hz  
FIDRES 0.366798 Hz  
AQ 1.3631488 sec  
RG 193.13  
DW 20.800 usec  
DE 6.50 usec  
TE 295.1 K  
D1 2.00000000 sec  
D11 0.03000000 sec  
TD0 1

==== CHANNEL f1 =====  
NUC1 13C  
P1 9.90 usec  
PLW1 53.00000000 W  
SFO1 100.6379178 MHz

==== CHANNEL f2 =====  
CPDPRG[2] waltz16  
NUC2 1H  
PCPD2 90.00 usec  
PLW2 14.00000000 W  
PLW12 0.35839999 W  
PLW13 0.29030001 W  
SFO2 400.1916008 MHz

F2 - Processing parameters  
SI 32768  
SF 100.6278675 MHz  
WDW EM  
SSB 0  
LB 1.00 Hz  
GB 0  
PC 1.40

yzk-5-31

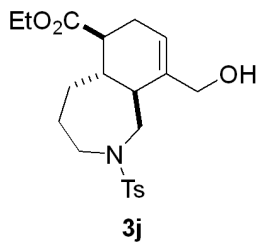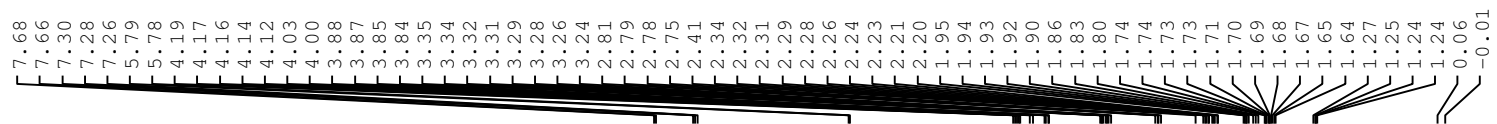

Current Data Parameters  
NAME 31-7YH-H NMR  
EXPNO 44  
PROCNO 1

F2 - Acquisition Parameters  
Date\_ 20220812  
Time 21.06  
INSTRUM spect  
PROBHD 5 mm PABBO BB-  
PULPROG zg30  
TD 65536  
SOLVENT CDC13  
NS 8  
DS 0  
SWH 8223.685 Hz  
FIDRES 0.125483 Hz  
AQ 3.9845889 sec  
RG 140.02  
DW 60.800 usec  
DE 6.50 usec  
TE 294.8 K  
D1 1.00000000 sec  
TD0 1

==== CHANNEL f1 =====  
NUC1 1H  
P1 14.68 usec  
PLW1 14.00000000 W  
SFO1 400.1924713 MHz

F2 - Processing parameters  
SI 65536  
SF 400.1900168 MHz  
WDW EM  
SSB 0  
LB 0.30 Hz  
GB 0  
PC 1.00

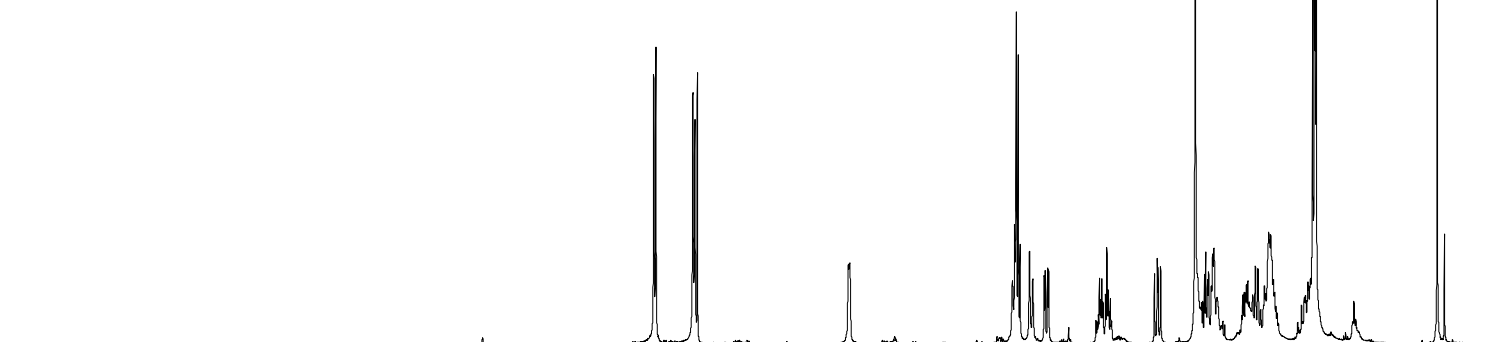

13 12 11 10 9 8 7 6 5 4 3 2 1 ppm

2.05  
2.10  
1.00  
3.09  
1.00  
0.93  
1.95  
0.94  
3.37  
1.04  
1.90  
3.15  
3.56  
3.85

yzk-5-31

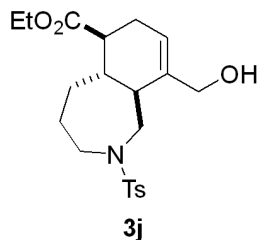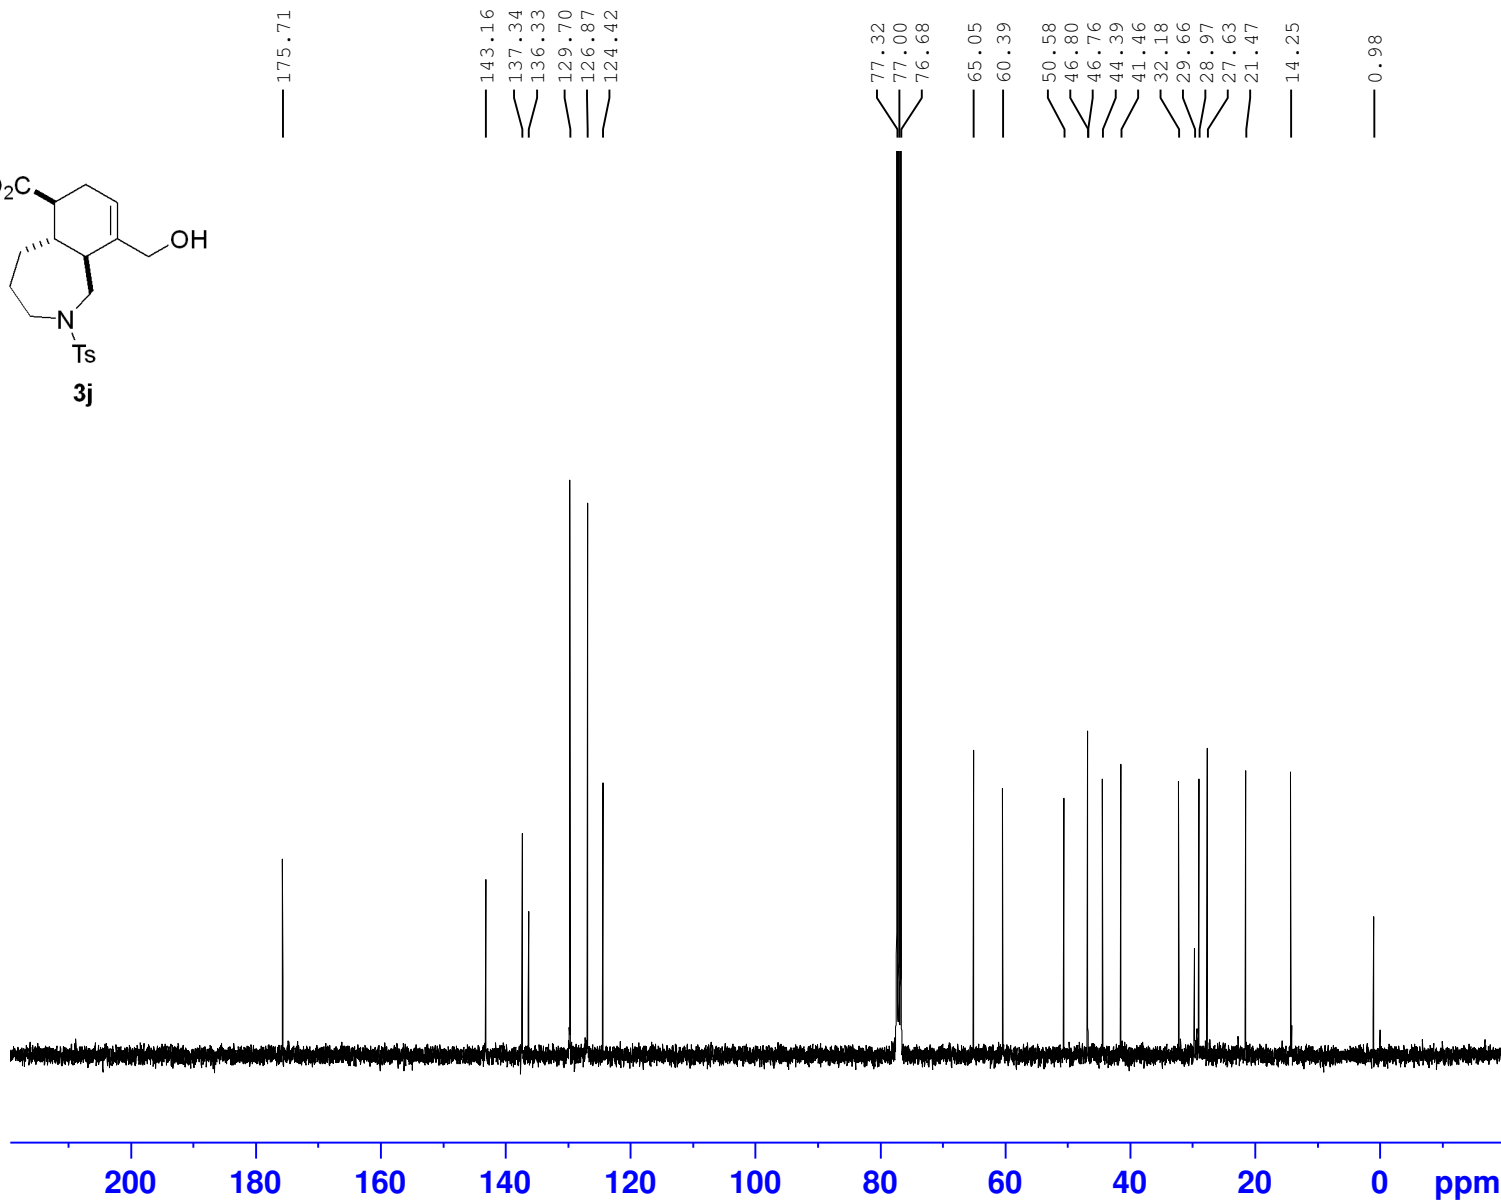

Current Data Parameters  
NAME 0812  
EXPNO 73  
PROCNO 1

F2 - Acquisition Parameters  
Date\_ 20220813  
Time 0.56  
INSTRUM spect  
PROBHD 5 mm PABBO BB-  
PULPROG zgpg30  
TD 65536  
SOLVENT CDC13  
NS 1024  
DS 4  
SWH 24038.461 Hz  
FIDRES 0.366798 Hz  
AQ 1.3631488 sec  
RG 193.13  
DW 20.800 usec  
DE 6.50 usec  
TE 295.5 K  
D1 2.00000000 sec  
D11 0.03000000 sec  
TD0 1

==== CHANNEL f1 =====  
NUC1 13C  
P1 12.00 usec  
PLW1 53.00000000 W  
SFO1 100.6379178 MHz

==== CHANNEL f2 =====  
CPDPRG[2] waltz16  
NUC2 1H  
PCPD2 90.00 usec  
PLW2 14.00000000 W  
PLW12 0.37246999 W  
PLW13 0.30170000 W  
SFO2 400.1916008 MHz

F2 - Processing parameters  
SI 32768  
SF 100.6278616 MHz  
WDW EM  
SSB 0  
LB 1.00 Hz  
GB 0  
PC 1.40

3sjwei 5615 yzk-3-34-fr 1h cdcl3

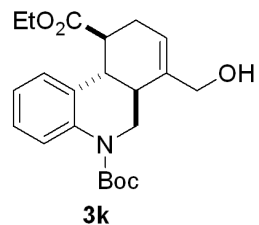

7.52  
7.26  
7.19  
7.18  
7.17  
7.15  
7.14  
7.00  
6.99  
5.83  
5.81  
4.30  
4.29  
4.28  
4.27  
4.24  
4.22  
4.22  
4.20  
4.18  
4.16  
4.15  
4.14  
4.14  
4.09  
4.08  
3.86  
3.84  
3.82  
3.80  
3.52  
3.48  
3.44  
2.91  
2.87  
2.84  
2.83  
2.81  
2.80  
2.59  
2.54  
2.52  
2.38  
2.37  
2.34  
2.34  
2.19  
2.17  
1.81  
1.51  
1.31  
1.28  
1.26  
-0.01

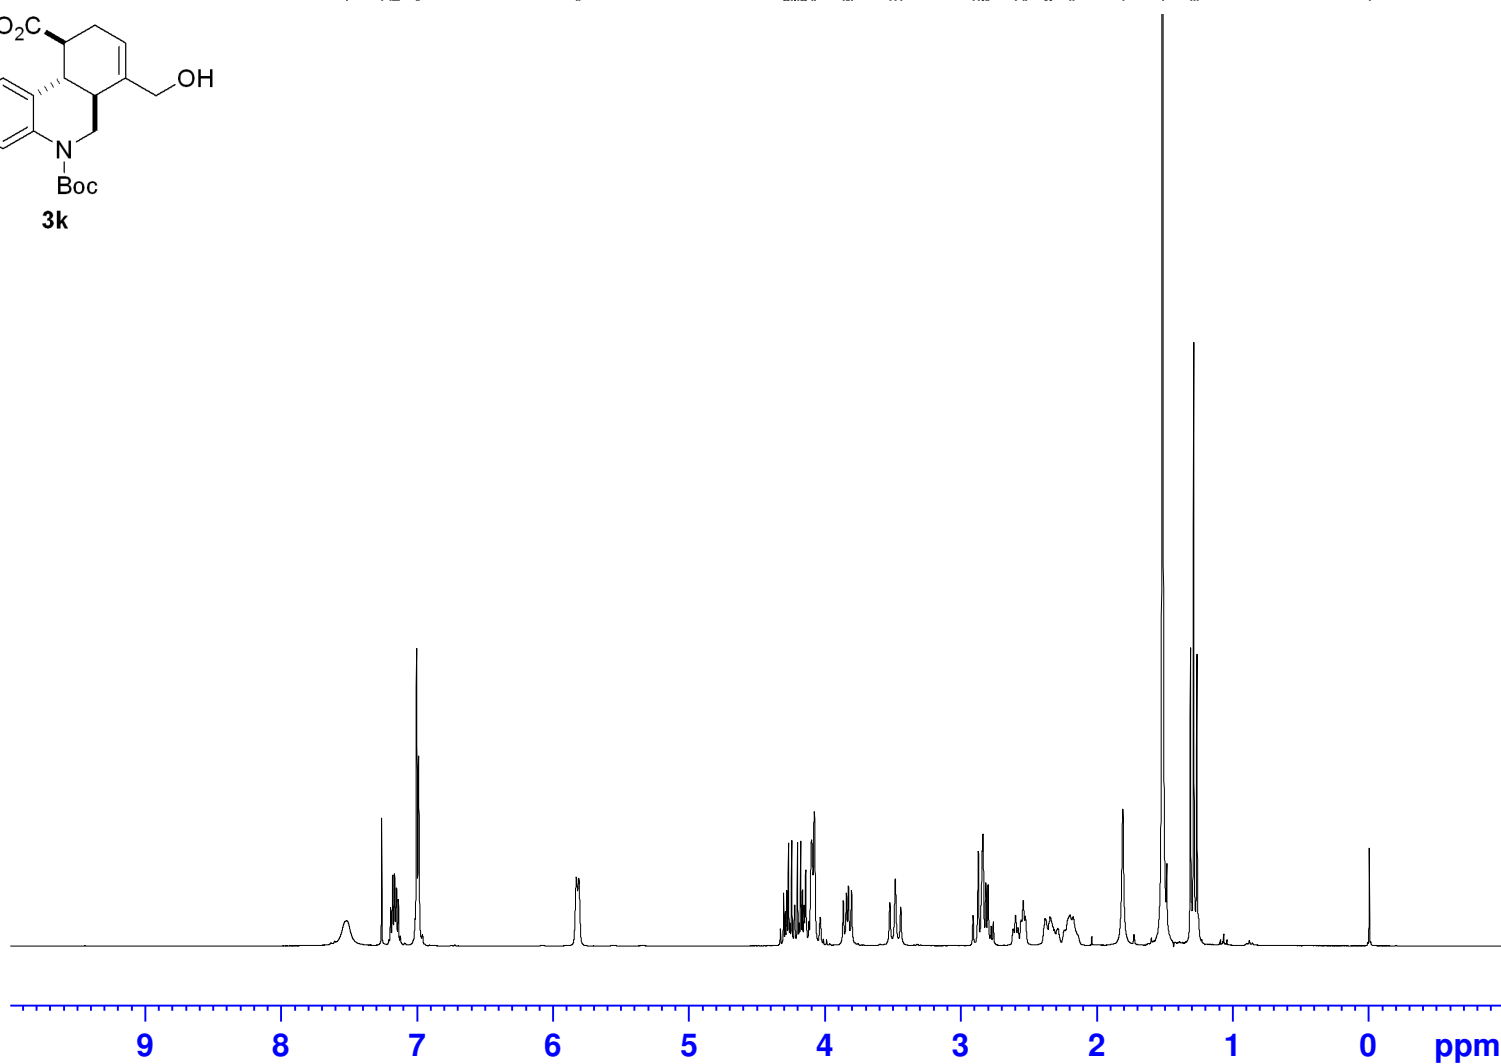

0.92  
1.03  
2.00  
1.00  
4.09  
1.00  
0.97  
2.05  
1.01  
2.08  
1.24  
8.97  
3.09

Current Data Parameters  
NAME 3-34  
EXPNO 5615  
PROCNO 1

F2 - Acquisition Parameters  
Date\_ 20211113  
Time 12.46  
INSTRUM spect  
PROBHD 5 mm PABBO BB-  
PULPROG zg30  
TD 65536  
SOLVENT CDCl3  
NS 16  
DS 2  
SWH 6009.615 Hz  
FIDRES 0.091699 Hz  
AQ 5.4525952 sec  
RG 101  
DW 83.200 usec  
DE 6.50 usec  
TE -59.1 K  
D1 1.00000000 sec  
TD0 1

==== CHANNEL f1 =====  
SFO1 300.1318534 MHz  
NUC1 1H  
P1 10.00 usec  
PLW1 14.00000000 W

F2 - Processing parameters  
SI 65536  
SF 300.1300072 MHz  
WDW EM  
SSB 0  
LB 0.30 Hz  
GB 0  
PC 1.00

3sjwei 5616 yzk-3-34-fr 13c cdcl3

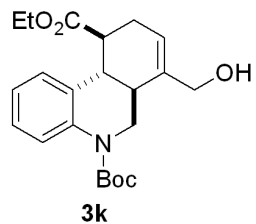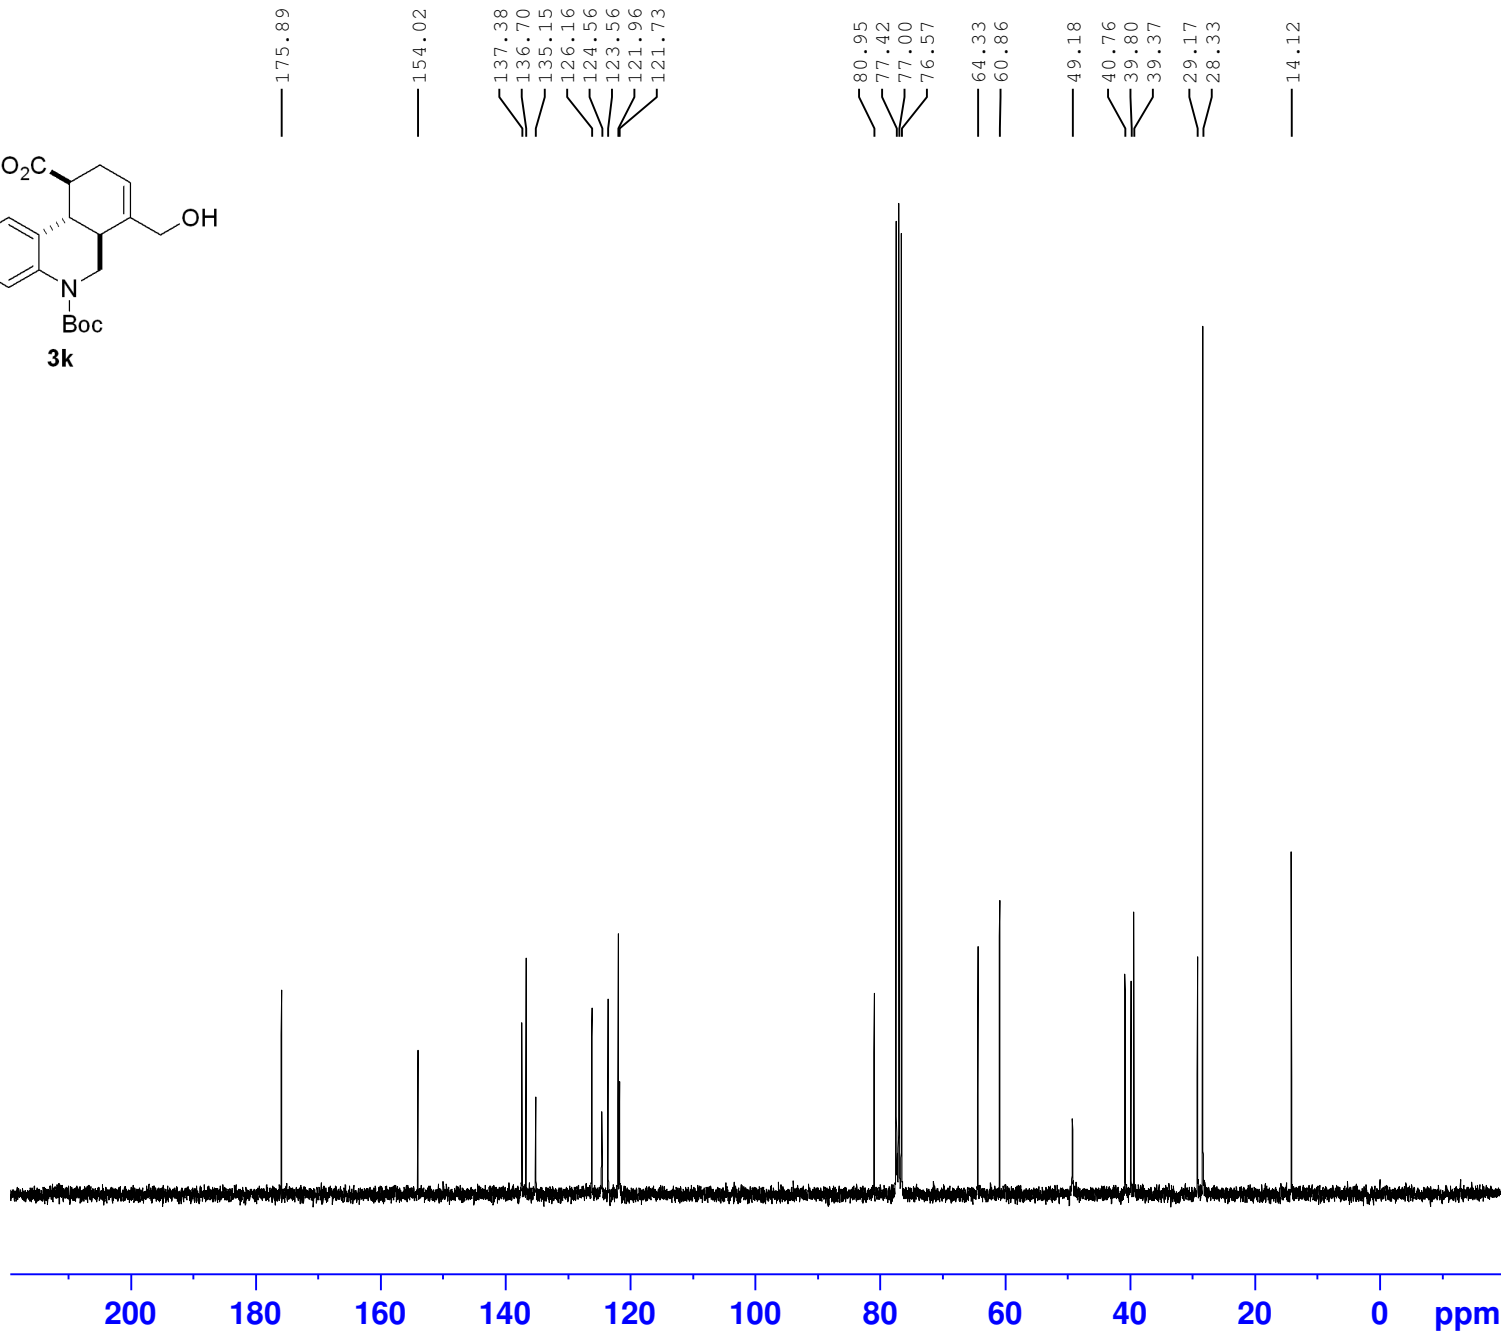

Current Data Parameters  
NAME 3-34  
EXPNO 5616  
PROCNO 1

F2 - Acquisition Parameters  
Date\_ 20211113  
Time 13.26  
INSTRUM spect  
PROBHD 5 mm PABBO BB-  
PULPROG zgpg30  
TD 65536  
SOLVENT CDC13  
NS 600  
DS 4  
SWH 18028.846 Hz  
FIDRES 0.275098 Hz  
AQ 1.8175317 sec  
RG 203  
DW 27.733 usec  
DE 6.50 usec  
TE -59.1 K  
D1 2.00000000 sec  
D11 0.03000000 sec  
TD0 1

==== CHANNEL f1 =====  
SFO1 75.4752949 MHz  
NUC1 13C  
P1 9.50 usec  
PLW1 34.20000076 W

==== CHANNEL f2 =====  
SFO2 300.1312005 MHz  
NUC2 1H  
CPDPRG[2] waltz16  
PCPD2 90.00 usec  
PLW2 14.00000000 W  
PLW12 0.17284000 W  
PLW13 0.14000000 W

F2 - Processing parameters  
SI 32768  
SF 75.4677541 MHz  
WDW EM  
SSB 0  
LB 1.00 Hz  
GB 0  
PC 1.40

YZK-4-40

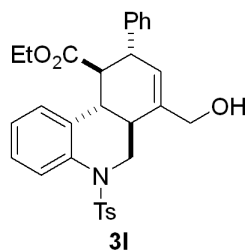

7.79  
7.77  
7.43  
7.41  
7.26  
7.24  
7.22  
7.21  
7.19  
7.16  
7.14  
7.13  
7.10  
7.08  
7.06  
6.81  
6.79  
6.74  
6.72  
5.80  
5.79  
4.24  
4.23  
4.21  
4.20  
4.18  
4.16  
4.13  
4.12  
3.90  
3.89  
3.88  
3.71  
3.70  
3.70  
3.69  
3.67  
3.57  
3.55  
3.54  
3.53  
3.52  
3.51  
3.48  
3.03  
3.02  
3.00  
2.24  
2.09  
2.06

Current Data Parameters  
NAME 3n-yzk-4-40H  
EXPNO 1  
PROCNO 1

F2 - Acquisition Parameters  
Date\_ 20220615  
Time 14.56  
INSTRUM spect  
PROBHD 5 mm PABBO BB-  
PULPROG zg30  
TD 65536  
SOLVENT CDC13  
NS 6  
DS 2  
SWH 8223.685 Hz  
FIDRES 0.125483 Hz  
AQ 3.9845889 sec  
RG 100.49  
DW 60.800 usec  
DE 6.50 usec  
TE 295.0 K  
D1 1.00000000 sec  
TD0 1

==== CHANNEL f1 =====  
NUC1 1H  
P1 14.40 usec  
PLW1 14.00000000 W  
SFO1 400.1924713 MHz

F2 - Processing parameters  
SI 65536  
SF 400.1900167 MHz  
WDW EM  
SSB 0  
LB 0.30 Hz  
GB 0  
PC 1.00

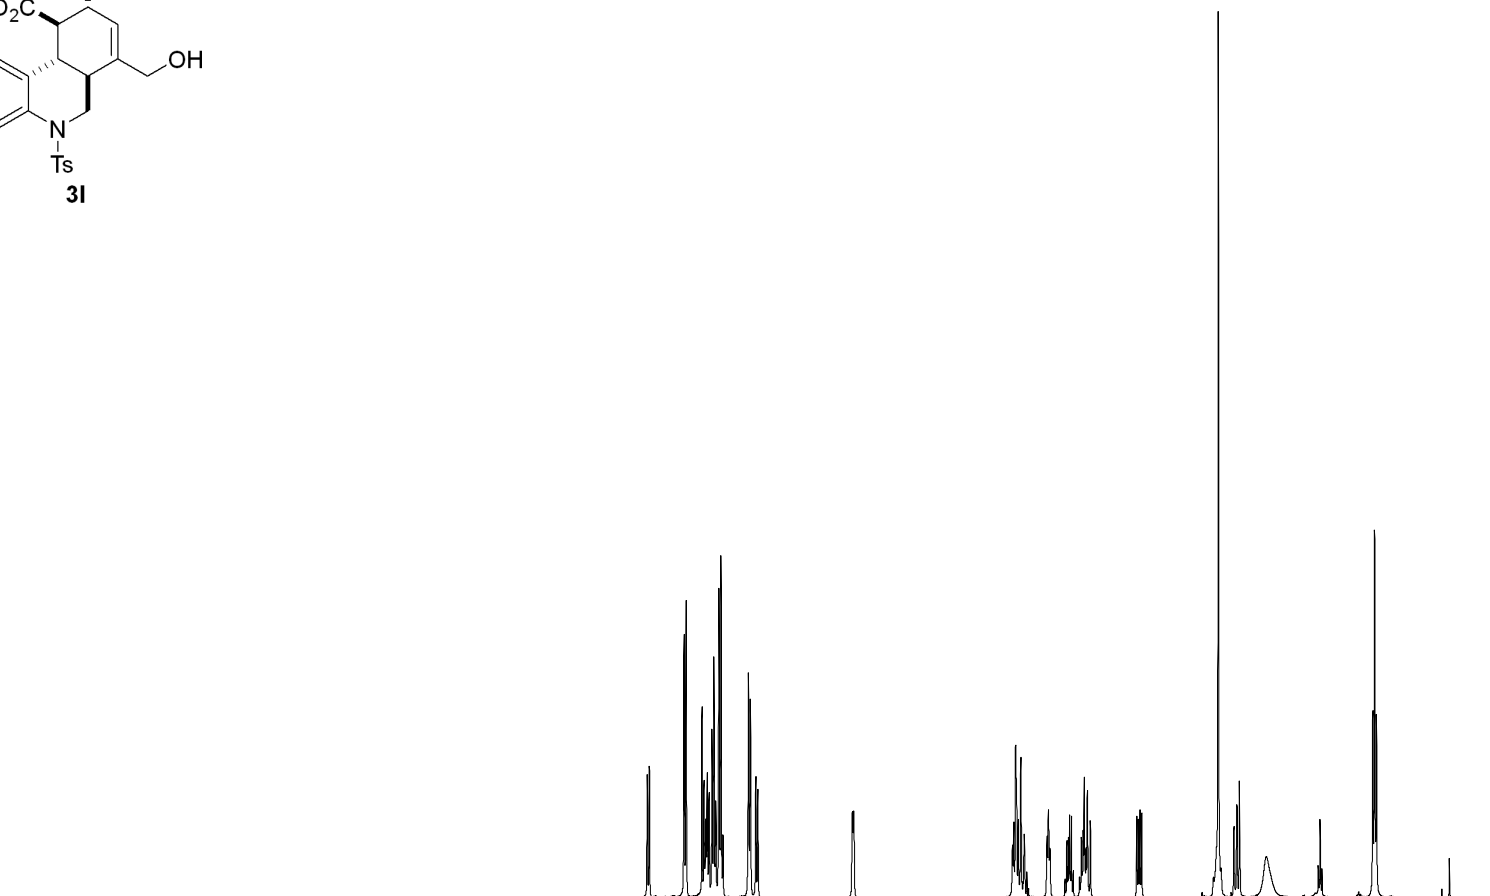

13 12 11 10 9 8 7 6 5 4 3 2 1 ppm

1.02  
2.06  
7.49  
1.98  
1.00  
1.00  
3.15  
1.07  
1.05  
2.02  
1.01  
4.04  
1.26  
3.03



YZK-4-40

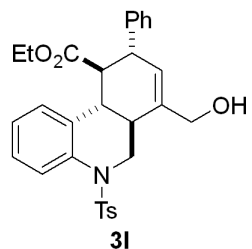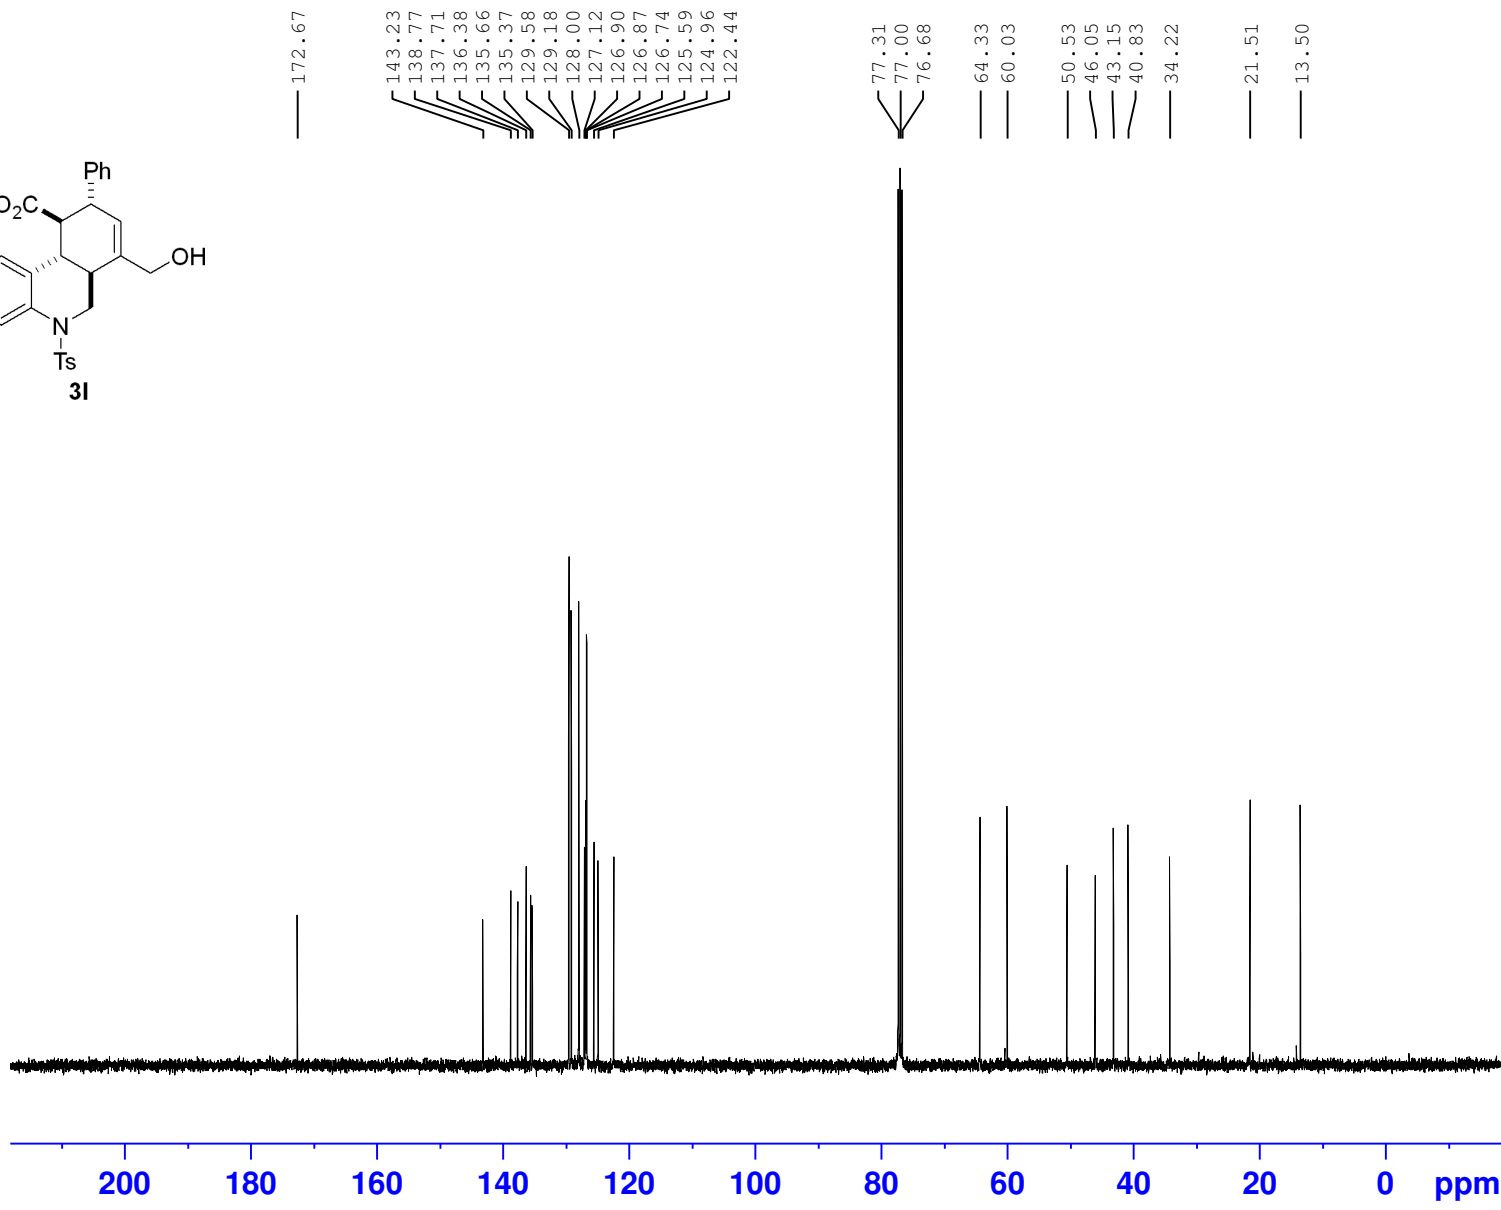

Current Data Parameters  
NAME 0616  
EXPNO 5  
PROCNO 1

F2 - Acquisition Parameters  
Date\_ 20220616  
Time 17.11 h  
INSTRUM Avance  
PROBHD z116098\_0833 (  
PULPROG zgpg30  
TD 65536  
SOLVENT CDCl3  
NS 400  
DS 4  
SWH 23809.523 Hz  
FIDRES 0.726609 Hz  
AQ 1.3762560 sec  
RG 50.1934  
DW 21.000 usec  
DE 6.50 usec  
TE 295.5 K  
D1 2.00000000 sec  
D11 0.03000000 sec  
TD0 1  
SFO1 100.6228298 MHz  
NUC1 13C  
P0 3.33 usec  
P1 10.00 usec  
PLW1 87.89900208 W  
SFO2 400.1316005 MHz  
NUC2 1H  
CPDPRG[2] waltz65  
PCPD2 90.00 usec  
PLW2 20.73200035 W  
PLW12 0.25595000 W  
PLW13 0.12874000 W

F2 - Processing parameters  
SI 32768  
SF 100.6127760 MHz  
WDW EM  
SSB 0  
LB 1.00 Hz  
GB 0  
PC 1.40

YZK-4-48

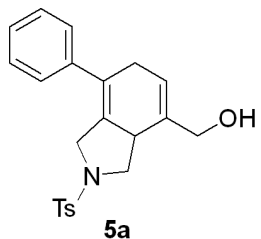

7.65  
7.63  
7.35  
7.33  
7.31  
7.29  
7.28  
7.27  
7.26  
7.25  
7.11  
7.09  
5.83  
4.17  
4.14  
4.10  
4.02  
4.00  
3.98  
3.70  
3.66  
3.32  
3.30  
3.28  
3.15  
3.10  
2.97  
2.95  
2.92  
2.89  
2.80  
2.78  
2.77  
2.75  
2.39  
-0.00

Current Data Parameters  
NAME 0617  
EXPNO 88  
PROCNO 1

F2 - Acquisition Parameters  
Date\_ 20220617  
Time 16.15  
INSTRUM spect  
PROBHD 5 mm PABBO BB-  
PULPROG zg30  
TD 65536  
SOLVENT CDC13  
NS 8  
DS 2  
SWH 8223.685 Hz  
FIDRES 0.125483 Hz  
AQ 3.9845889 sec  
RG 90.23  
DW 60.800 usec  
DE 6.50 usec  
TE 294.9 K  
D1 1.00000000 sec  
TD0 1

==== CHANNEL f1 =====  
NUC1 1H  
P1 14.40 usec  
PLW1 14.00000000 W  
SFO1 400.1924713 MHz

F2 - Processing parameters  
SI 65536  
SF 400.1900180 MHz  
WDW EM  
SSB 0  
LB 0.30 Hz  
GB 0  
PC 1.00

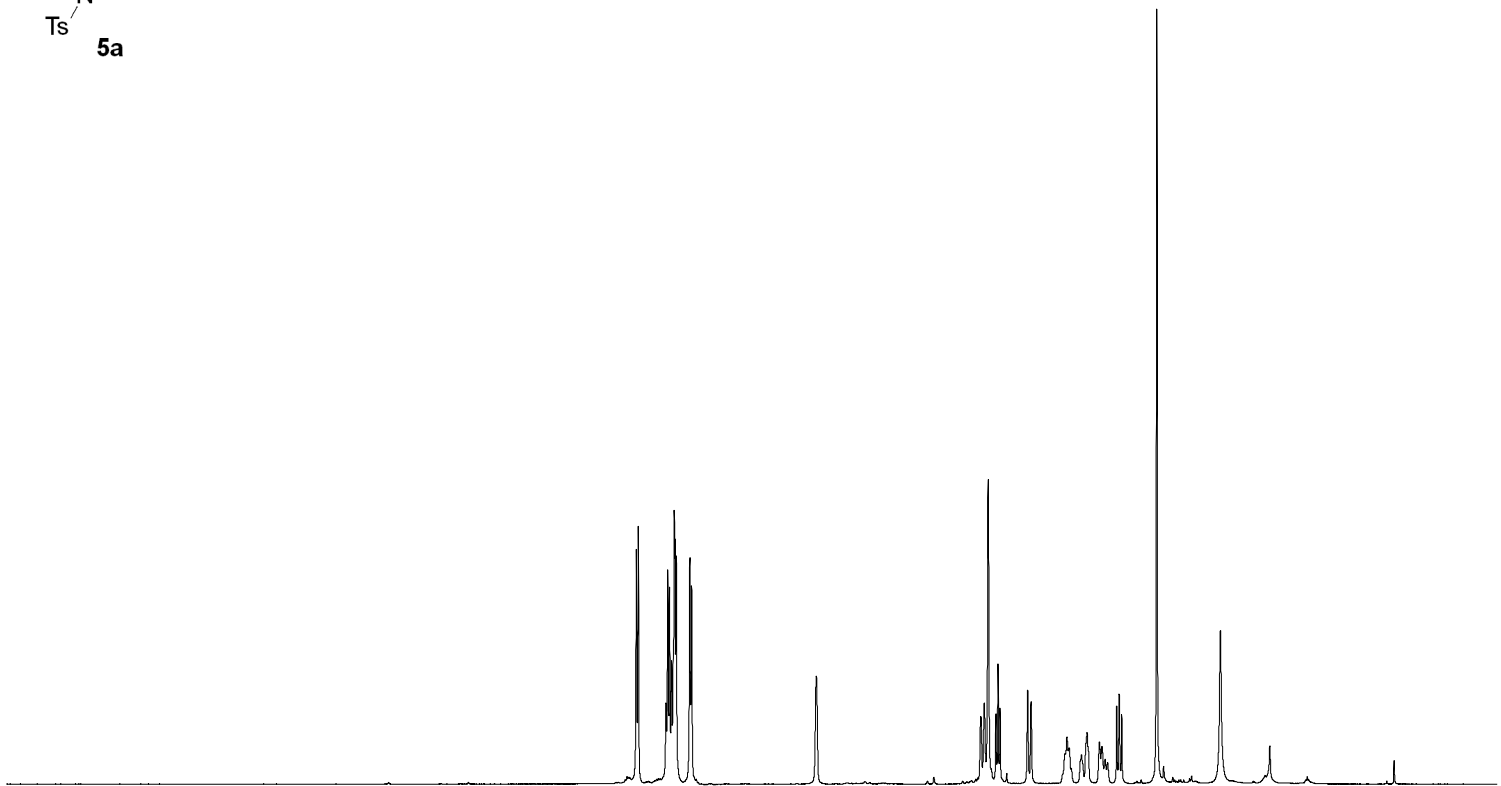

13 12 11 10 9 8 7 6 5 4 3 2 1 0 ppm

2.04  
5.76  
2.07  
1.00  
1.10  
1.93  
1.09  
1.02  
1.03  
1.06  
1.05  
1.03  
3.12

3sjwei 5316 yzk-2-82-fr 13c cdcl3

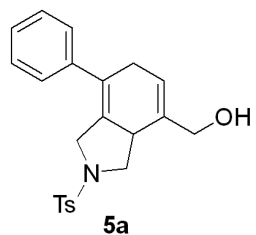

143.38  
139.64  
134.07  
133.69  
130.24  
129.63  
129.34  
128.30  
127.45  
127.30  
127.22  
122.47

77.42  
77.00  
76.57

65.04

51.31  
49.64

40.37

32.12

21.39

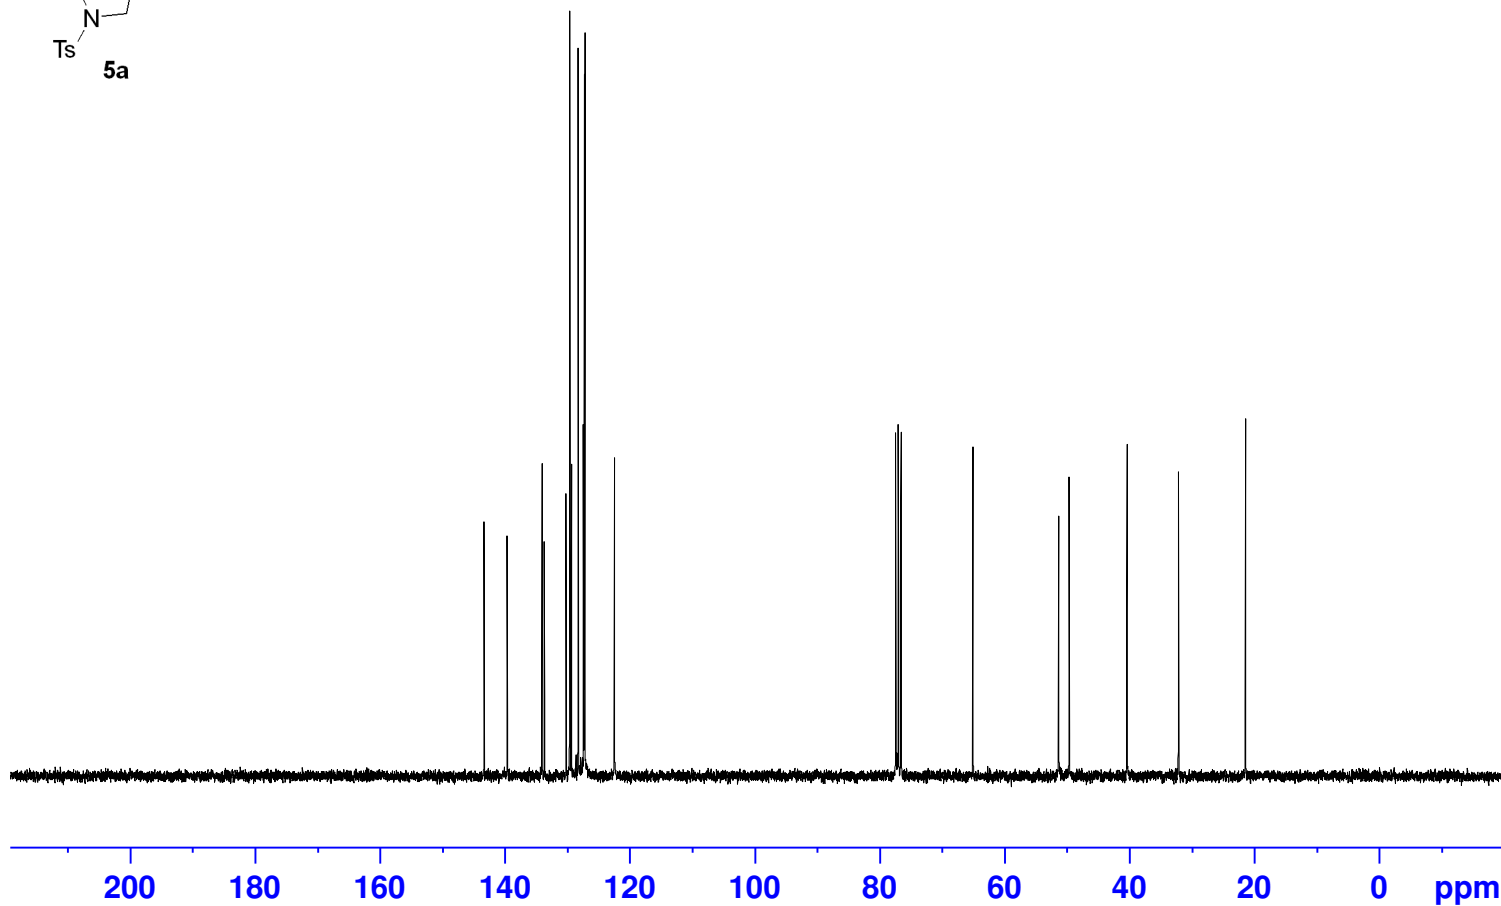

Current Data Parameters  
NAME 5a-zyk-2-82-C  
EXPNO 1  
PROCNO 1

F2 - Acquisition Parameters  
Date\_ 20210911  
Time 9.34  
INSTRUM spect  
PROBHD 5 mm PABBO BB-  
PULPROG zgpg30  
TD 65536  
SOLVENT CDC13  
NS 300  
DS 4  
SWH 18028.846 Hz  
FIDRES 0.275098 Hz  
AQ 1.8175317 sec  
RG 203  
DW 27.733 usec  
DE 6.50 usec  
TE -59.1 K  
D1 2.00000000 sec  
D11 0.03000000 sec  
TD0 1

===== CHANNEL f1 =====  
SFO1 75.4752949 MHz  
NUC1 13C  
P1 9.50 usec  
PLW1 34.20000076 W

===== CHANNEL f2 =====  
SFO2 300.1312005 MHz  
NUC2 1H  
CPDPRG[2] waltz16  
PCPD2 90.00 usec  
PLW2 14.00000000 W  
PLW12 0.17284000 W  
PLW13 0.14000000 W

F2 - Processing parameters  
SI 32768  
SF 75.4677596 MHz  
WDW EM  
SSB 0  
LB 1.00 Hz  
GB 0  
PC 1.40

3sjwei 5390 yzk-2-90 1h cdcl3

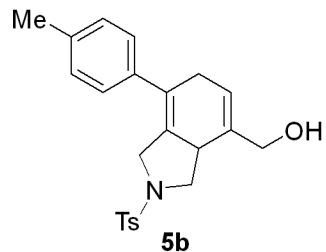

7.66  
7.63  
7.26  
7.24  
7.15  
7.12  
7.01  
6.98  
5.81  
4.19  
4.18  
4.14  
4.14  
4.13  
4.08  
4.02  
4.00  
3.99  
3.97  
3.72  
3.67  
3.32  
3.29  
3.26  
3.16  
3.15  
3.09  
3.07  
3.05  
2.94  
2.91  
2.87  
2.87  
2.84  
2.83  
2.79  
2.76  
2.73  
2.38  
2.35  
2.04  
2.00

Current Data Parameters  
NAME YZK-2-90  
EXPNO 5390  
PROCNO 1

F2 - Acquisition Parameters  
Date\_ 20210918  
Time 9.36  
INSTRUM spect  
PROBHD 5 mm PABBO BB-  
PULPROG zg30  
TD 65536  
SOLVENT CDC13  
NS 16  
DS 2  
SWH 6009.615 Hz  
FIDRES 0.091699 Hz  
AQ 5.4525952 sec  
RG 57  
DW 83.200 usec  
DE 6.50 usec  
TE -59.1 K  
D1 1.00000000 sec  
TD0 1

==== CHANNEL f1 =====  
SFO1 300.1318534 MHz  
NUC1 1H  
P1 10.00 usec  
PLW1 14.00000000 W

F2 - Processing parameters  
SI 65536  
SF 300.1300080 MHz  
WDW EM  
SSB 0  
LB 0.30 Hz  
GB 0  
PC 1.00

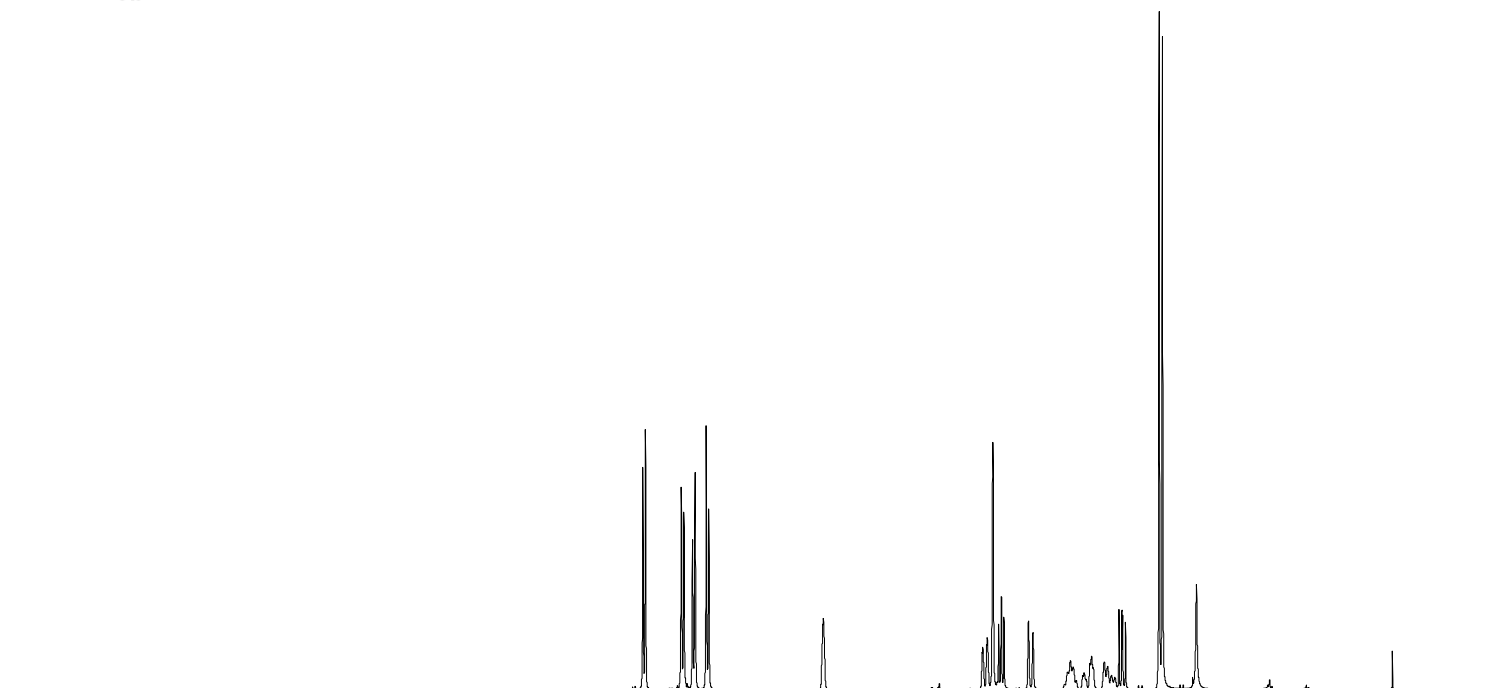

13 12 11 10 9 8 7 6 5 4 3 2 1 0 ppm

1.98  
2.09  
2.00  
2.02  
1.00  
1.04  
1.92  
1.03  
1.01  
1.01  
1.02  
1.02  
1.01  
2.97  
3.02

yzk-3-27-fr

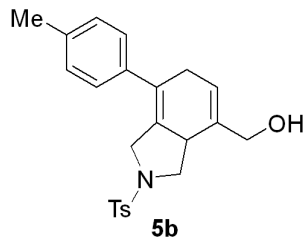

143.32  
137.20  
136.65  
134.10  
133.78  
129.73  
129.61  
129.15  
128.96  
127.31  
127.10  
122.51

77.31  
76.99  
76.68

65.06

51.27  
49.71

40.40

32.10

21.39  
21.05

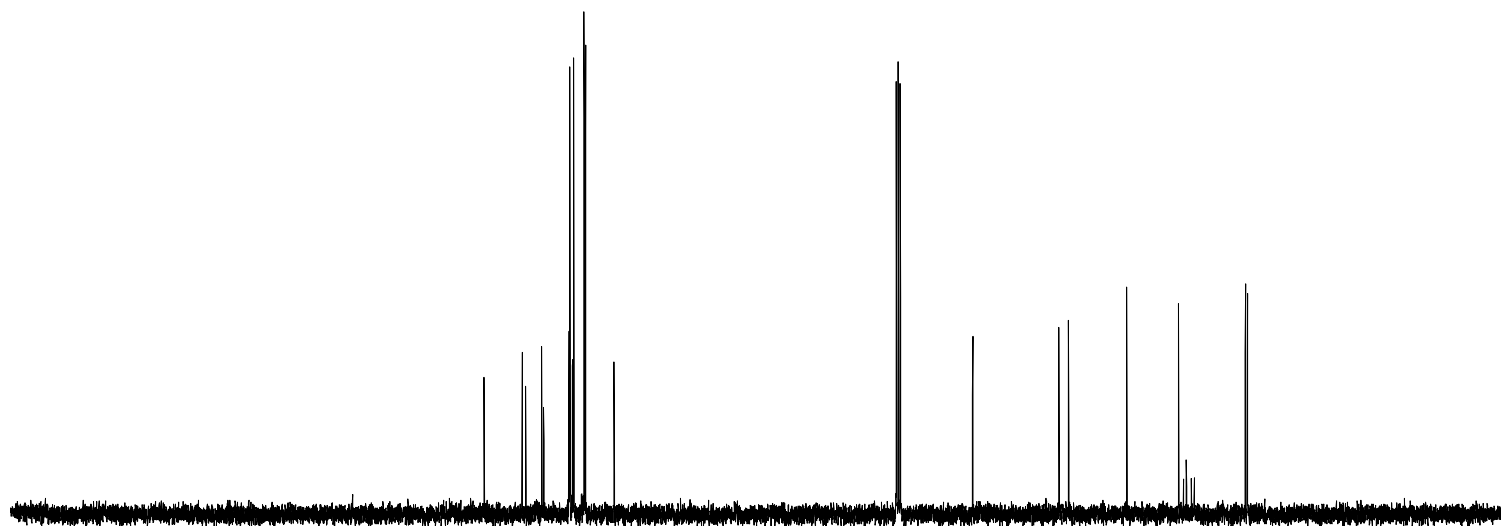

Current Data Parameters  
NAME w  
EXPNO 33  
PROCNO 1

F2 - Acquisition Parameters  
Date\_ 20211028  
Time 14.58  
INSTRUM spect  
PROBHD 5 mm PABBO BB-  
PULPROG zgpg30  
TD 65536  
SOLVENT CDC13  
NS 40  
DS 4  
SWH 24038.461 Hz  
FIDRES 0.366798 Hz  
AQ 1.3631488 sec  
RG 193.13  
DW 20.800 usec  
DE 6.50 usec  
TE 294.7 K  
D1 2.00000000 sec  
D11 0.03000000 sec  
TD0 1

==== CHANNEL f1 =====  
NUC1 13C  
P1 9.90 usec  
PLW1 53.00000000 W  
SFO1 100.6379178 MHz

==== CHANNEL f2 =====  
CPDPRG[2] waltz16  
NUC2 1H  
PCPD2 90.00 usec  
PLW2 14.00000000 W  
PLW12 0.35839999 W  
PLW13 0.29030001 W  
SFO2 400.1916008 MHz

F2 - Processing parameters  
SI 32768  
SF 100.6278720 MHz  
WDW EM  
SSB 0  
LB 1.00 Hz  
GB 0  
PC 1.40

3sjwei 5360 yzk-2-91-fr 1h cdcl3

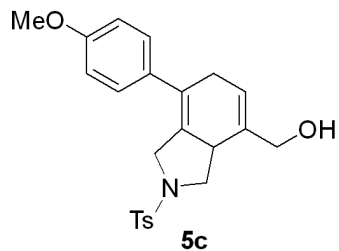

7.70  
7.67  
7.31  
7.28  
7.26  
7.10  
7.07  
6.92  
6.89  
5.86  
5.85  
4.24  
4.23  
4.19  
4.19  
4.18  
4.13  
4.06  
4.03  
4.03  
4.00  
3.89  
3.86  
3.75  
3.71  
3.36  
3.33  
3.30  
3.21  
3.19  
3.13  
3.11  
3.10  
2.98  
2.95  
2.95  
2.91  
2.82  
2.79  
2.78  
2.75  
2.43  
1.85  
0.04

Current Data Parameters  
NAME 5c-zyk-2-91-H  
EXPNO 1  
PROCNO 1

F2 - Acquisition Parameters  
Date\_ 20210917  
Time 9.25  
INSTRUM spect  
PROBHD 5 mm PABBO BB-  
PULPROG zg30  
TD 65536  
SOLVENT CDC13  
NS 16  
DS 2  
SWH 6009.615 Hz  
FIDRES 0.091699 Hz  
AQ 5.4525952 sec  
RG 90.5  
DW 83.200 usec  
DE 6.50 usec  
TE -59.1 K  
D1 1.00000000 sec  
TD0 1

==== CHANNEL f1 =====  
SFO1 300.1318534 MHz  
NUC1 1H  
P1 10.00 usec  
PLW1 14.00000000 W

F2 - Processing parameters  
SI 65536  
SF 300.1299940 MHz  
WDW EM  
SSB 0  
LB 0.30 Hz  
GB 0  
PC 1.00

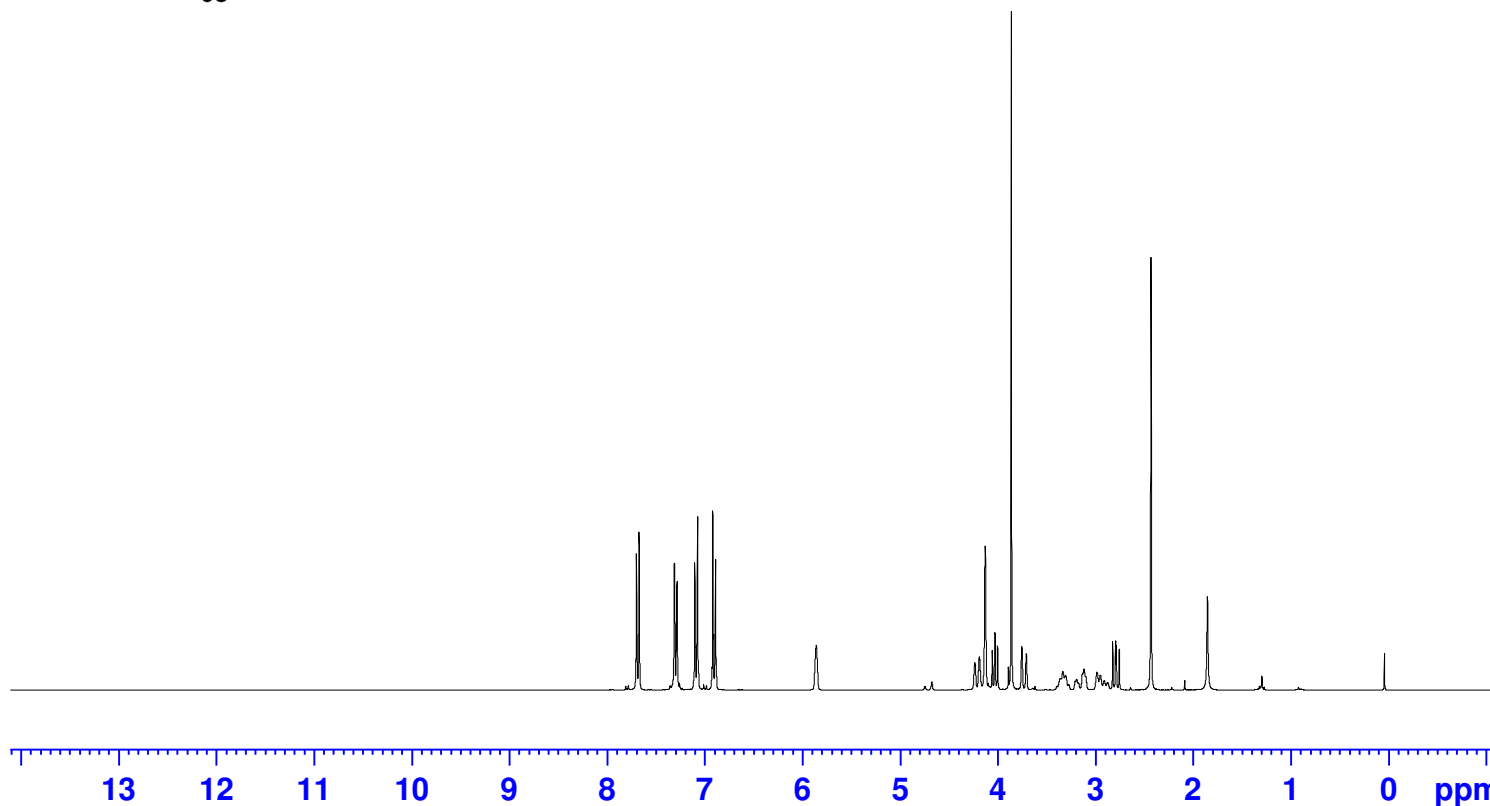

2.01  
2.14  
1.99  
1.99  
1.00  
1.10  
1.95  
1.03  
2.99  
1.02  
1.04  
1.04  
1.05  
1.02  
3.13

3sjwei 5399 yzk-2-91-fr 13c cdcl3

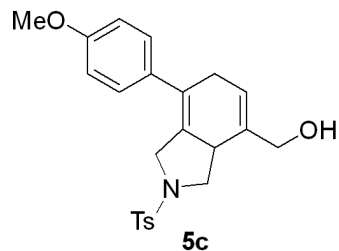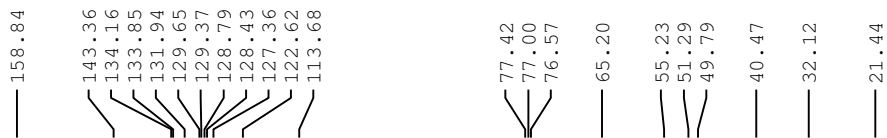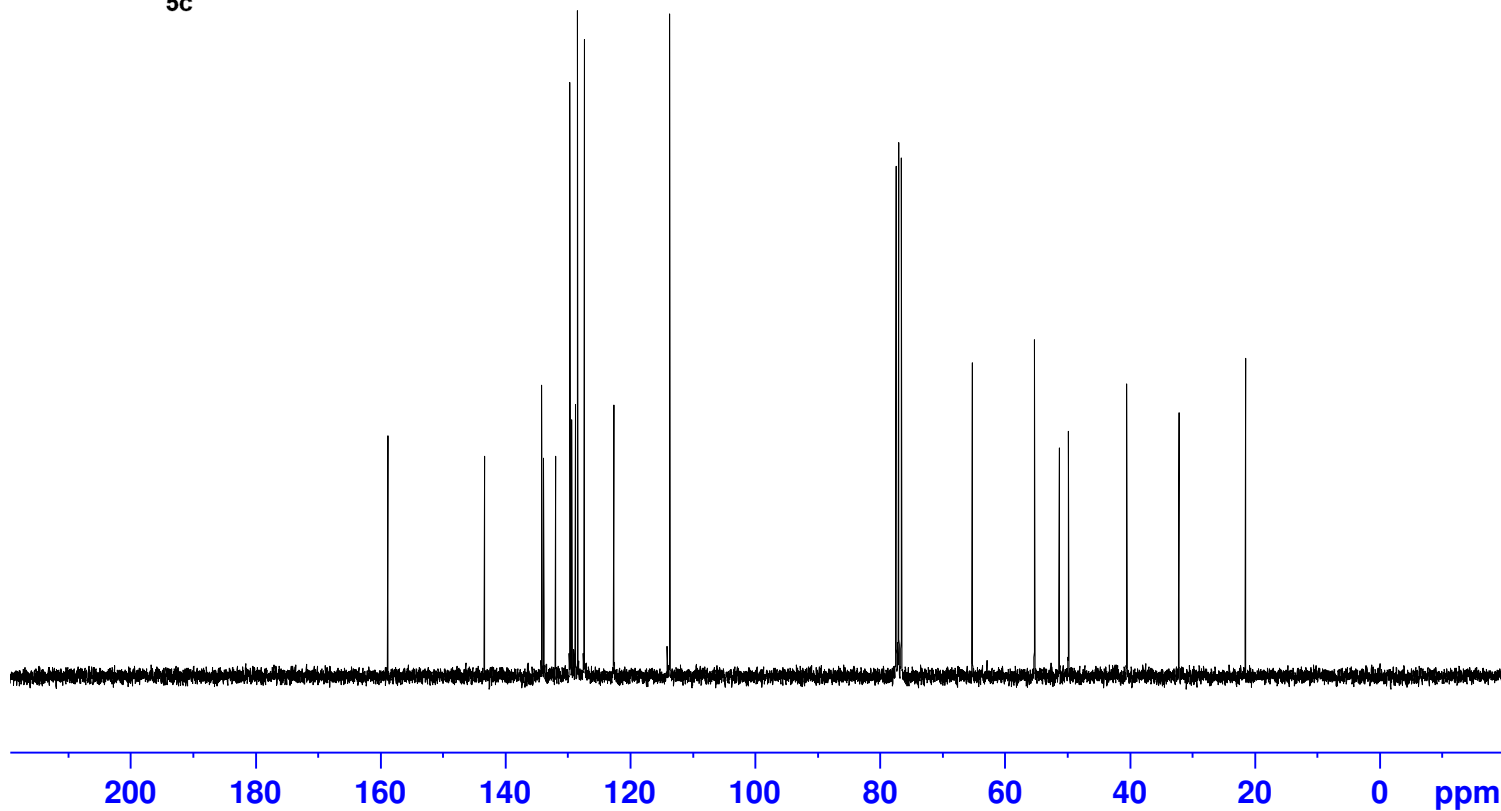

Current Data Parameters  
NAME 5c-zyk-2-91-C  
EXPNO 1  
PROCNO 1

F2 - Acquisition Parameters  
Date\_ 20210918  
Time 10.53  
INSTRUM spect  
PROBHD 5 mm PABBO BB-  
PULPROG zgpg30  
TD 65536  
SOLVENT CDC13  
NS 400  
DS 4  
SWH 18028.846 Hz  
FIDRES 0.275098 Hz  
AQ 1.8175317 sec  
RG 203  
DW 27.733 usec  
DE 6.50 usec  
TE -59.1 K  
D1 2.0000000 sec  
D11 0.0300000 sec  
TD0 1

==== CHANNEL f1 =====  
SFO1 75.4752949 MHz  
NUC1 13C  
P1 9.50 usec  
PLW1 34.20000076 W

==== CHANNEL f2 =====  
SFO2 300.1312005 MHz  
NUC2 1H  
CPDPRG[2] waltz16  
PCPD2 90.00 usec  
PLW2 14.00000000 W  
PLW12 0.17284000 W  
PLW13 0.14000000 W

F2 - Processing parameters  
SI 32768  
SF 75.4677553 MHz  
WDW EM  
SSB 0  
LB 1.00 Hz  
GB 0  
PC 1.40

3sjwei 5363 yzk-2-88-fr 1h cdcl3

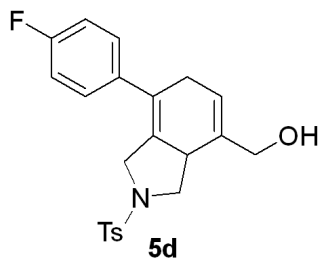

7.65  
7.62  
7.27  
7.26  
7.25  
7.09  
7.08  
7.07  
7.06  
7.05  
7.04  
7.04  
7.03  
7.01  
7.01  
7.00  
6.99  
6.98  
5.82  
5.81  
5.81  
5.81  
4.15  
4.14  
4.14  
4.14  
4.09  
4.02  
4.00  
3.99  
3.97  
3.65  
3.60  
3.29  
3.05  
3.03  
2.95  
2.91  
2.79  
2.76  
2.76  
2.73  
2.39  
1.89

Current Data Parameters  
NAME YZK-2-88  
EXPNO 5363  
PROCNO 1

F2 - Acquisition Parameters  
Date\_ 20210916  
Time 10.46  
INSTRUM spect  
PROBHD 5 mm PABBO BB-  
PULPROG zg30  
TD 65536  
SOLVENT CDCl3  
NS 16  
DS 2  
SWH 6009.615 Hz  
FIDRES 0.091699 Hz  
AQ 5.4525952 sec  
RG 80.6  
DW 83.200 usec  
DE 6.50 usec  
TE -59.1 K  
D1 1.00000000 sec  
TD0 1

==== CHANNEL f1 =====  
SFO1 300.1318534 MHz  
NUC1 1H  
P1 10.00 usec  
PLW1 14.00000000 W

F2 - Processing parameters  
SI 65536  
SF 300.1300074 MHz  
WDW EM  
SSB 0  
LB 0.30 Hz  
GB 0  
PC 1.00

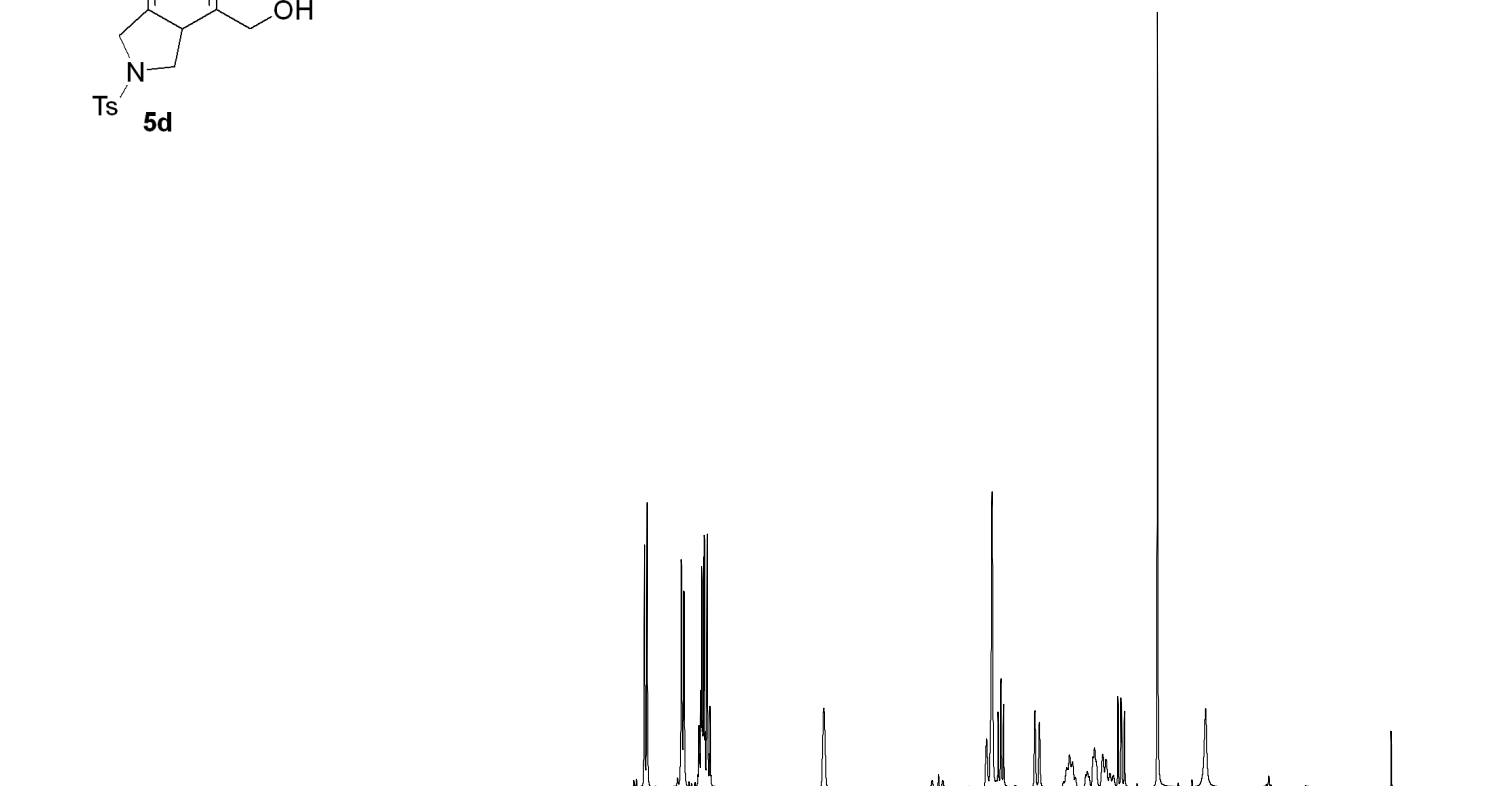

13 12 11 10 9 8 7 6 5 4 3 2 1 0 ppm

2.02  
2.18  
4.12  
1.00  
2.98  
1.04  
1.05  
1.04  
3.14  
3.19  
1.21



3sjwei 5376 yzk-2-88-fr 13c cdcl3

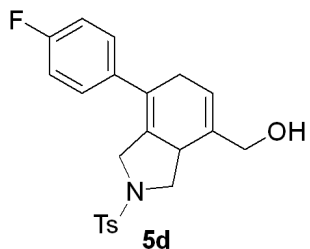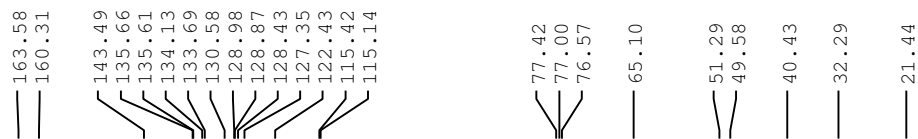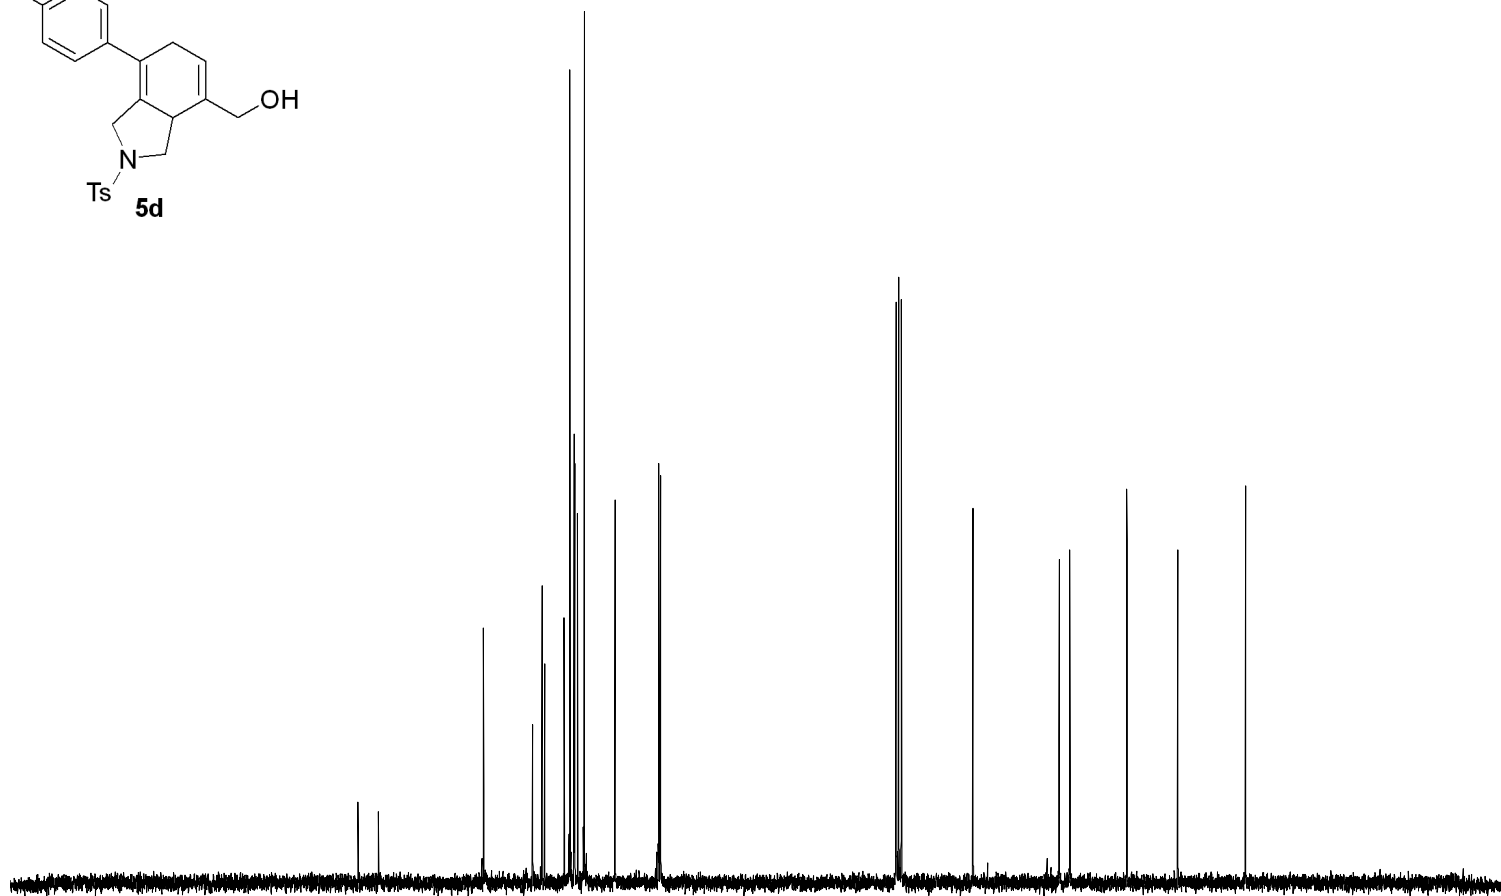

Current Data Parameters  
NAME 5d-zyk-2-88-C  
EXPNO 1  
PROCNO 1

F2 - Acquisition Parameters  
Date\_ 20210917  
Time 11.05  
INSTRUM spect  
PROBHD 5 mm PABBO BB-  
PULPROG zgpg30  
TD 65536  
SOLVENT CDC13  
NS 400  
DS 4  
SWH 18028.846 Hz  
FIDRES 0.275098 Hz  
AQ 1.8175317 sec  
RG 203  
DW 27.733 usec  
DE 6.50 usec  
TE -59.1 K  
D1 2.00000000 sec  
D11 0.03000000 sec  
TD0 1

===== CHANNEL f1 =====  
SFO1 75.4752949 MHz  
NUC1 13C  
P1 9.50 usec  
PLW1 34.20000076 W

===== CHANNEL f2 =====  
SFO2 300.1312005 MHz  
NUC2 1H  
CPDPRG[2] waltz16  
PCPD2 90.00 usec  
PLW2 14.00000000 W  
PLW12 0.17284000 W  
PLW13 0.14000000 W

F2 - Processing parameters  
SI 32768  
SF 75.4677557 MHz  
WDW EM  
SSB 0  
LB 1.00 Hz  
GB 0  
PC 1.40

200 180 160 140 120 100 80 60 40 20 0 ppm

3sjwei 5364 yzk-2-88-fr 19f cdcl3

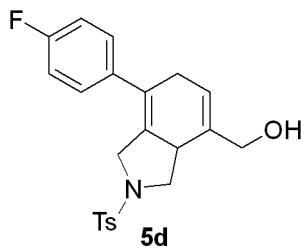

-114.18

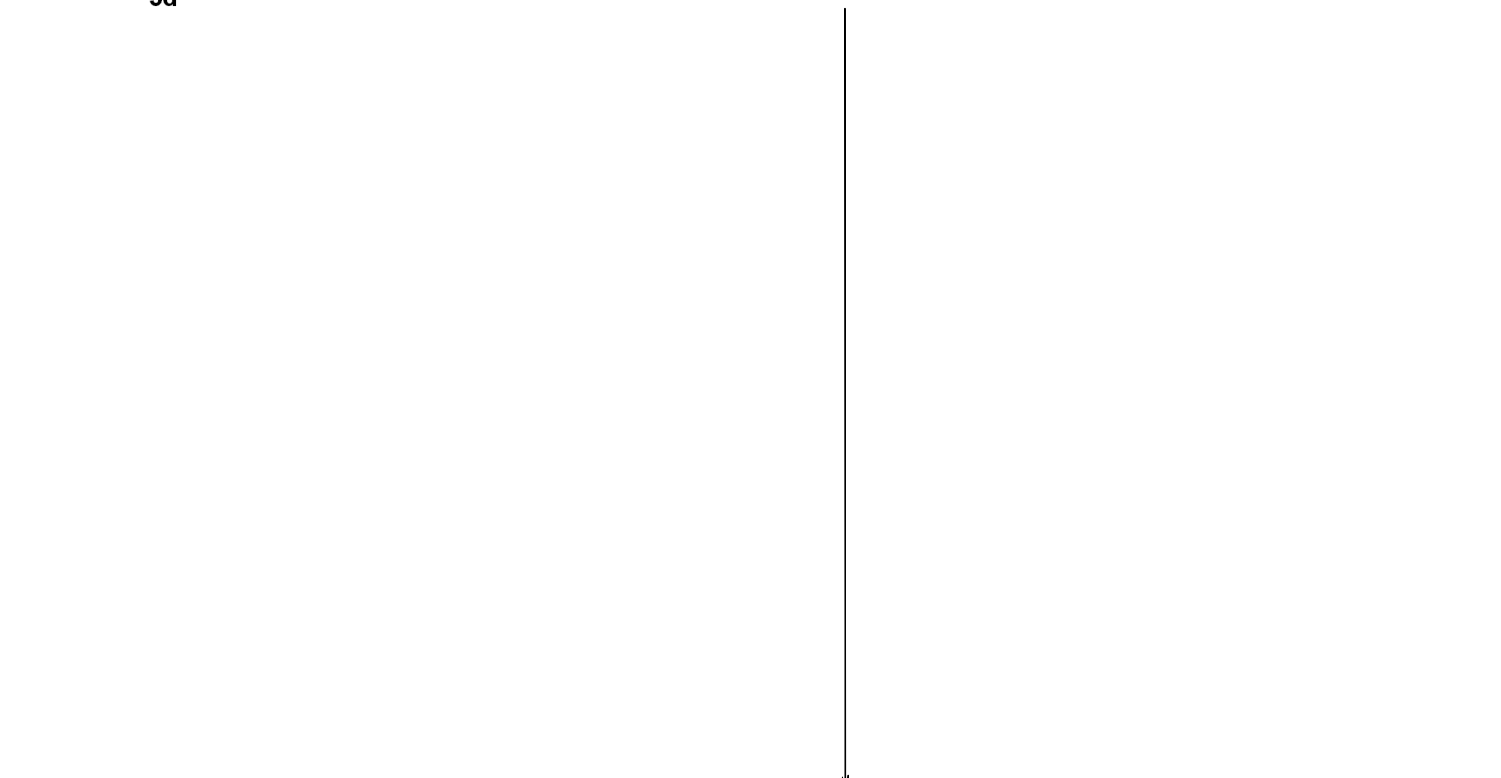

Current Data Parameters  
NAME workup  
EXPNO 5364  
PROCNO 1

F2 - Acquisition Parameters  
Date\_ 20210916  
Time 10.48  
INSTRUM spect  
PROBHD 5 mm PABBO BB-  
PULPROG zgfhigqn.2  
TD 131072  
SOLVENT CDCl3  
NS 16  
DS 4  
SWH 66964.289 Hz  
FIDRES 0.510897 Hz  
AQ 0.9786710 sec  
RG 203  
DW 7.467 usec  
DE 6.50 usec  
TE -59.1 K  
D1 1.00000000 sec  
D11 0.03000000 sec  
D12 0.00002000 sec  
TD0 1

==== CHANNEL f1 =====  
SFO1 282.3761148 MHz  
NUC1 19F  
P1 14.50 usec  
PLW1 10.39999962 W

==== CHANNEL f2 =====  
SFO2 300.1312005 MHz  
NUC2 1H  
CPDPRG[2] waltz16  
PCPD2 90.00 usec  
PLW2 14.00000000 W  
PLW12 0.17284000 W

F2 - Processing parameters  
SI 65536  
SF 282.4043552 MHz  
WDW EM  
SSB 0  
LB 0.30 Hz  
GB 0  
PC 1.00

3sjwei 5603 yzk-3-39 1h acetone

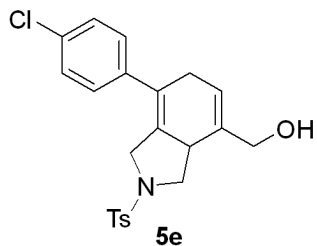

7.67  
7.64  
7.40  
7.38  
7.35  
7.25  
7.23  
5.78  
4.23  
4.18  
4.06  
4.03  
4.00  
3.97  
3.95  
3.93  
3.92  
3.62  
3.57  
3.29  
3.26  
3.20  
3.19  
3.12  
2.92  
2.77  
2.74  
2.71  
2.39  
2.06  
2.05  
2.04

Current Data Parameters  
NAME 3-39  
EXPNO 5603  
PROCNO 1

F2 - Acquisition Parameters  
Date\_ 20211113  
Time 10.03  
INSTRUM spect  
PROBHD 5 mm PABBO BB-  
PULPROG zg30  
TD 65536  
SOLVENT Acetone  
NS 16  
DS 2  
SWH 6009.615 Hz  
FIDRES 0.091699 Hz  
AQ 5.4525952 sec  
RG 101  
DW 83.200 usec  
DE 6.50 usec  
TE -59.1 K  
D1 1.00000000 sec  
TD0 1

==== CHANNEL f1 =====  
SFO1 300.1318534 MHz  
NUC1 1H  
P1 10.00 usec  
PLW1 14.00000000 W

F2 - Processing parameters  
SI 65536  
SF 300.1300052 MHz  
WDW EM  
SSB 0  
LB 0.30 Hz  
GB 0  
PC 1.00

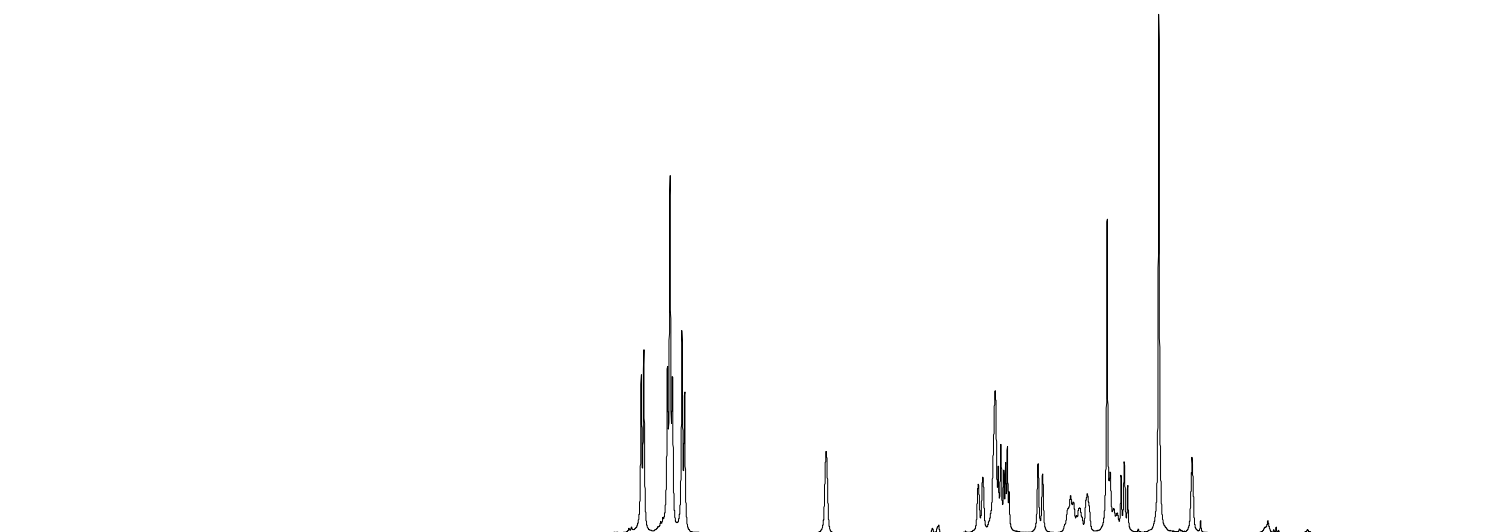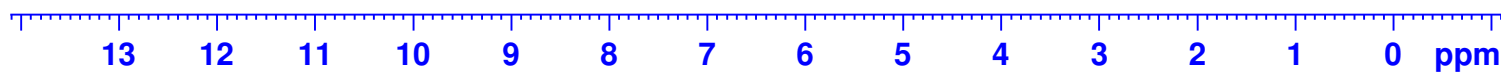

2.08  
4.03  
2.06  
1.00  
1.01  
4.06  
1.04  
2.13  
2.28  
3.12

3sjwei 5604 yzk-3-39 13c acetone

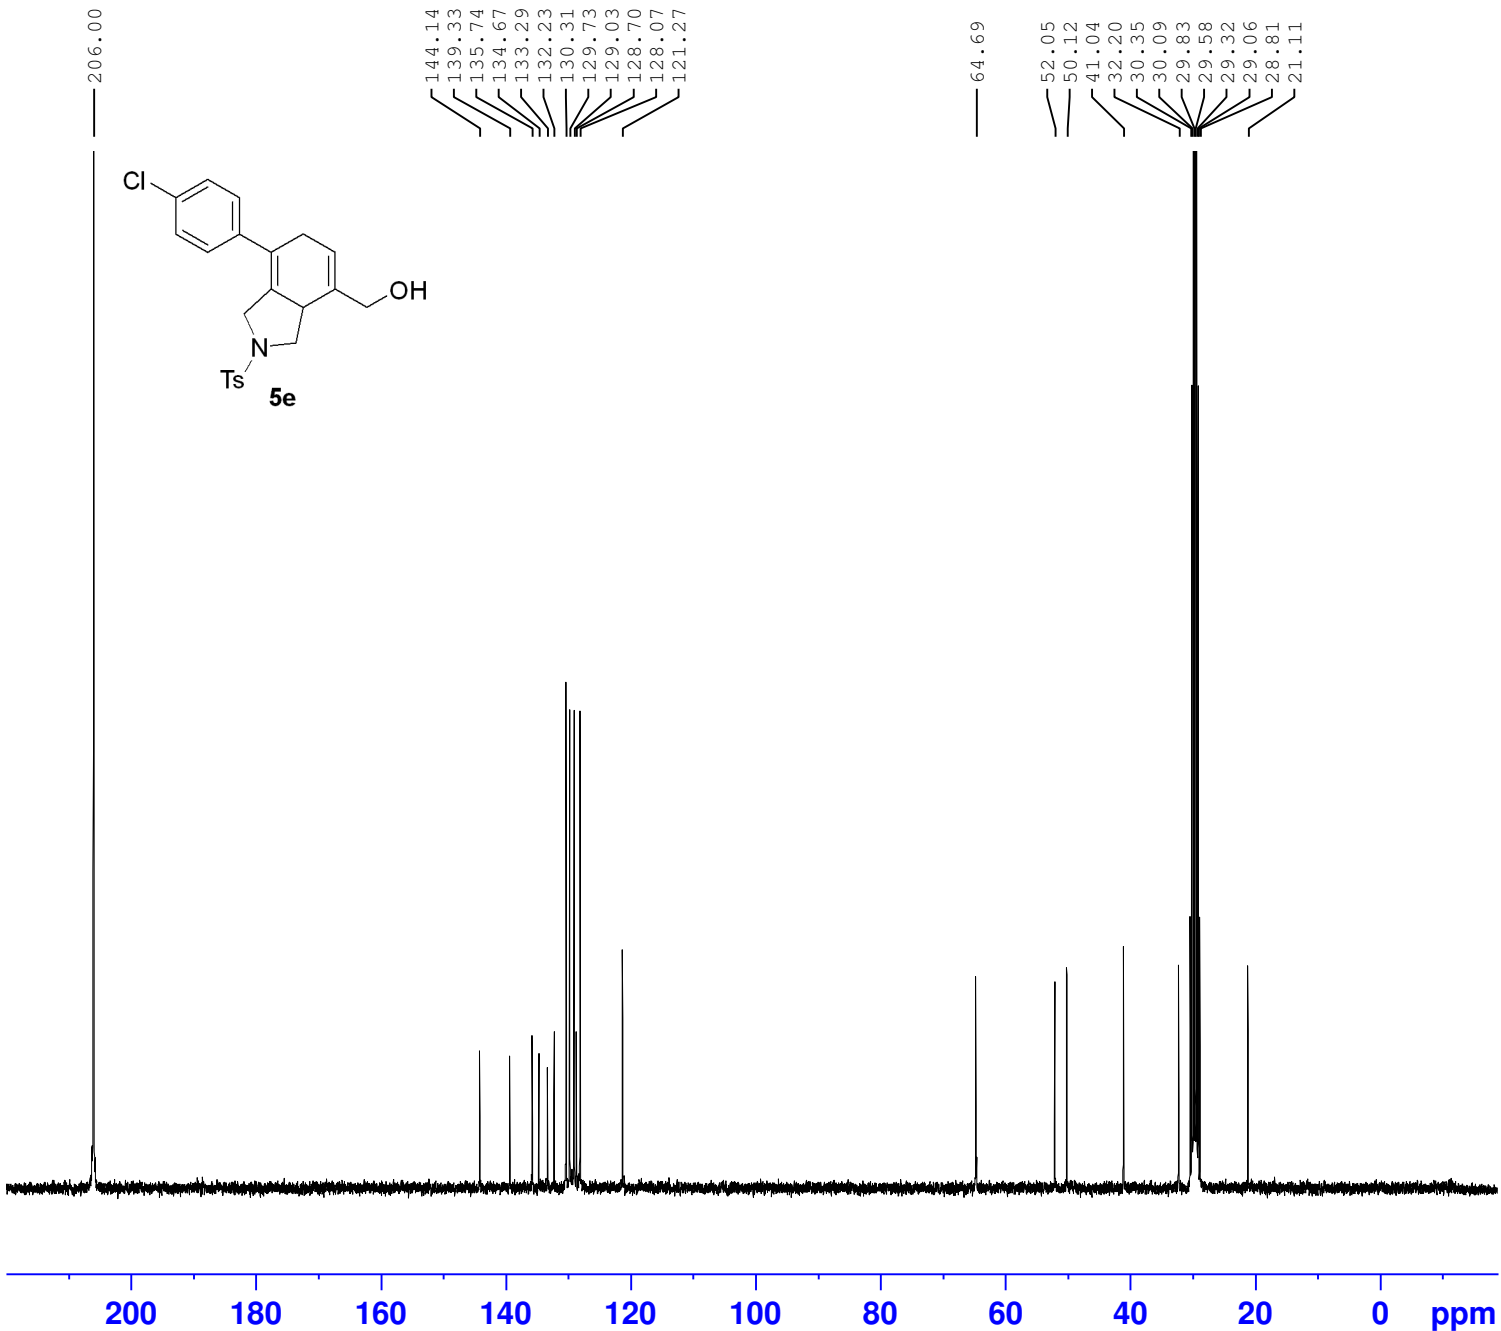

Current Data Parameters  
NAME 3-39  
EXPNO 5604  
PROCNO 1

F2 - Acquisition Parameters  
Date\_ 20211113  
Time 10.50  
INSTRUM spect  
PROBHD 5 mm PABBO BB-  
PULPROG zgpg30  
TD 65536  
SOLVENT Acetone  
NS 700  
DS 4  
SWH 18028.846 Hz  
FIDRES 0.275098 Hz  
AQ 1.8175317 sec  
RG 203  
DW 27.733 usec  
DE 6.50 usec  
TE -59.1 K  
D1 2.00000000 sec  
D11 0.03000000 sec  
TD0 1

==== CHANNEL f1 =====  
SFO1 75.4752949 MHz  
NUC1 13C  
P1 9.50 usec  
PLW1 34.20000076 W

==== CHANNEL f2 =====  
SFO2 300.1312005 MHz  
NUC2 1H  
CPDPRG[2] waltz16  
PCPD2 90.00 usec  
PLW2 14.00000000 W  
PLW12 0.17284000 W  
PLW13 0.14000000 W

F2 - Processing parameters  
SI 32768  
SF 75.4677050 MHz  
WDW EM  
SSB 0  
LB 1.00 Hz  
GB 0  
PC 1.40

YZK-3-32-fr

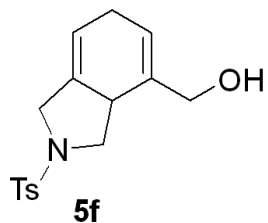

7.83  
7.81  
7.51  
7.49  
5.75  
5.66  
4.14  
4.13  
4.10  
4.09  
4.08  
4.07  
4.04  
4.02  
3.97  
3.95  
3.94  
3.82  
3.79  
3.14  
3.12  
3.10  
3.05  
3.03  
2.83  
2.81  
2.80  
2.78  
2.73  
2.72  
2.71  
2.49  
2.05

Current Data Parameters  
NAME 3-32  
EXPNO 36  
PROCNO 1

F2 - Acquisition Parameters  
Date\_ 20211029  
Time 14.50  
INSTRUM spect  
PROBHD 5 mm PABBO BB-  
PULPROG zg30  
TD 65536  
SOLVENT Acetone  
NS 8  
DS 2  
SWH 8223.685 Hz  
FIDRES 0.125483 Hz  
AQ 3.9845889 sec  
RG 29.75  
DW 60.800 usec  
DE 6.50 usec  
TE 294.2 K  
D1 1.00000000 sec  
TD0 1

==== CHANNEL f1 =====  
NUC1 1H  
P1 14.40 usec  
PLW1 14.00000000 W  
SFO1 400.1924713 MHz

F2 - Processing parameters  
SI 65536  
SF 400.1899775 MHz  
WDW EM  
SSB 0  
LB 0.30 Hz  
GB 0  
PC 1.00

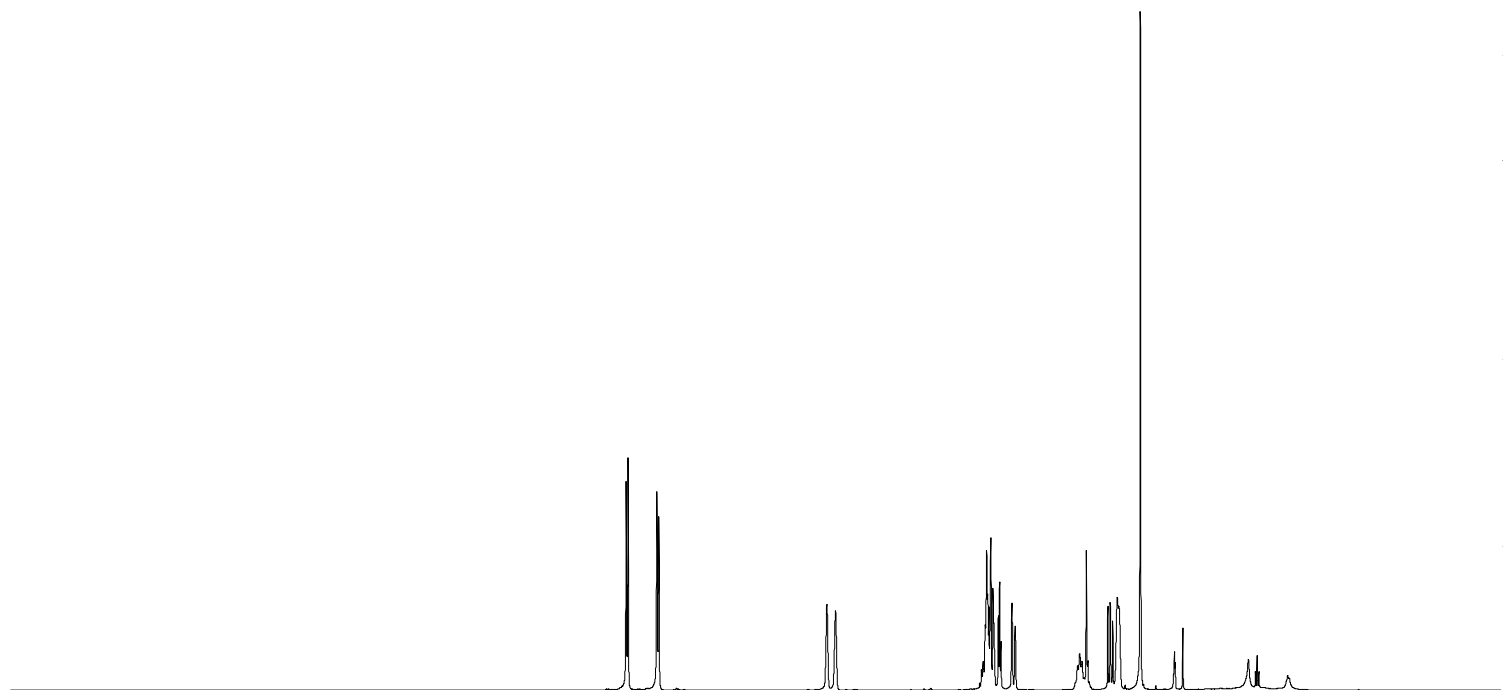

14 13 12 11 10 9 8 7 6 5 4 3 2 1 0 ppm

2.05  
2.06  
1.01  
1.00  
4.40  
0.94  
1.05  
1.02  
1.10  
2.05  
3.17

YZK-3-32-fr

206.10

144.12  
136.04  
135.70  
134.62  
130.32  
128.17  
121.38  
117.45

64.96  
52.80  
50.89  
39.25  
30.18  
29.99  
29.80  
29.61  
29.42  
29.22  
29.03  
27.60  
21.15

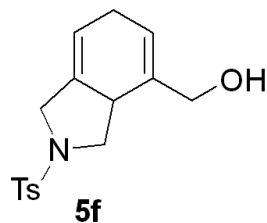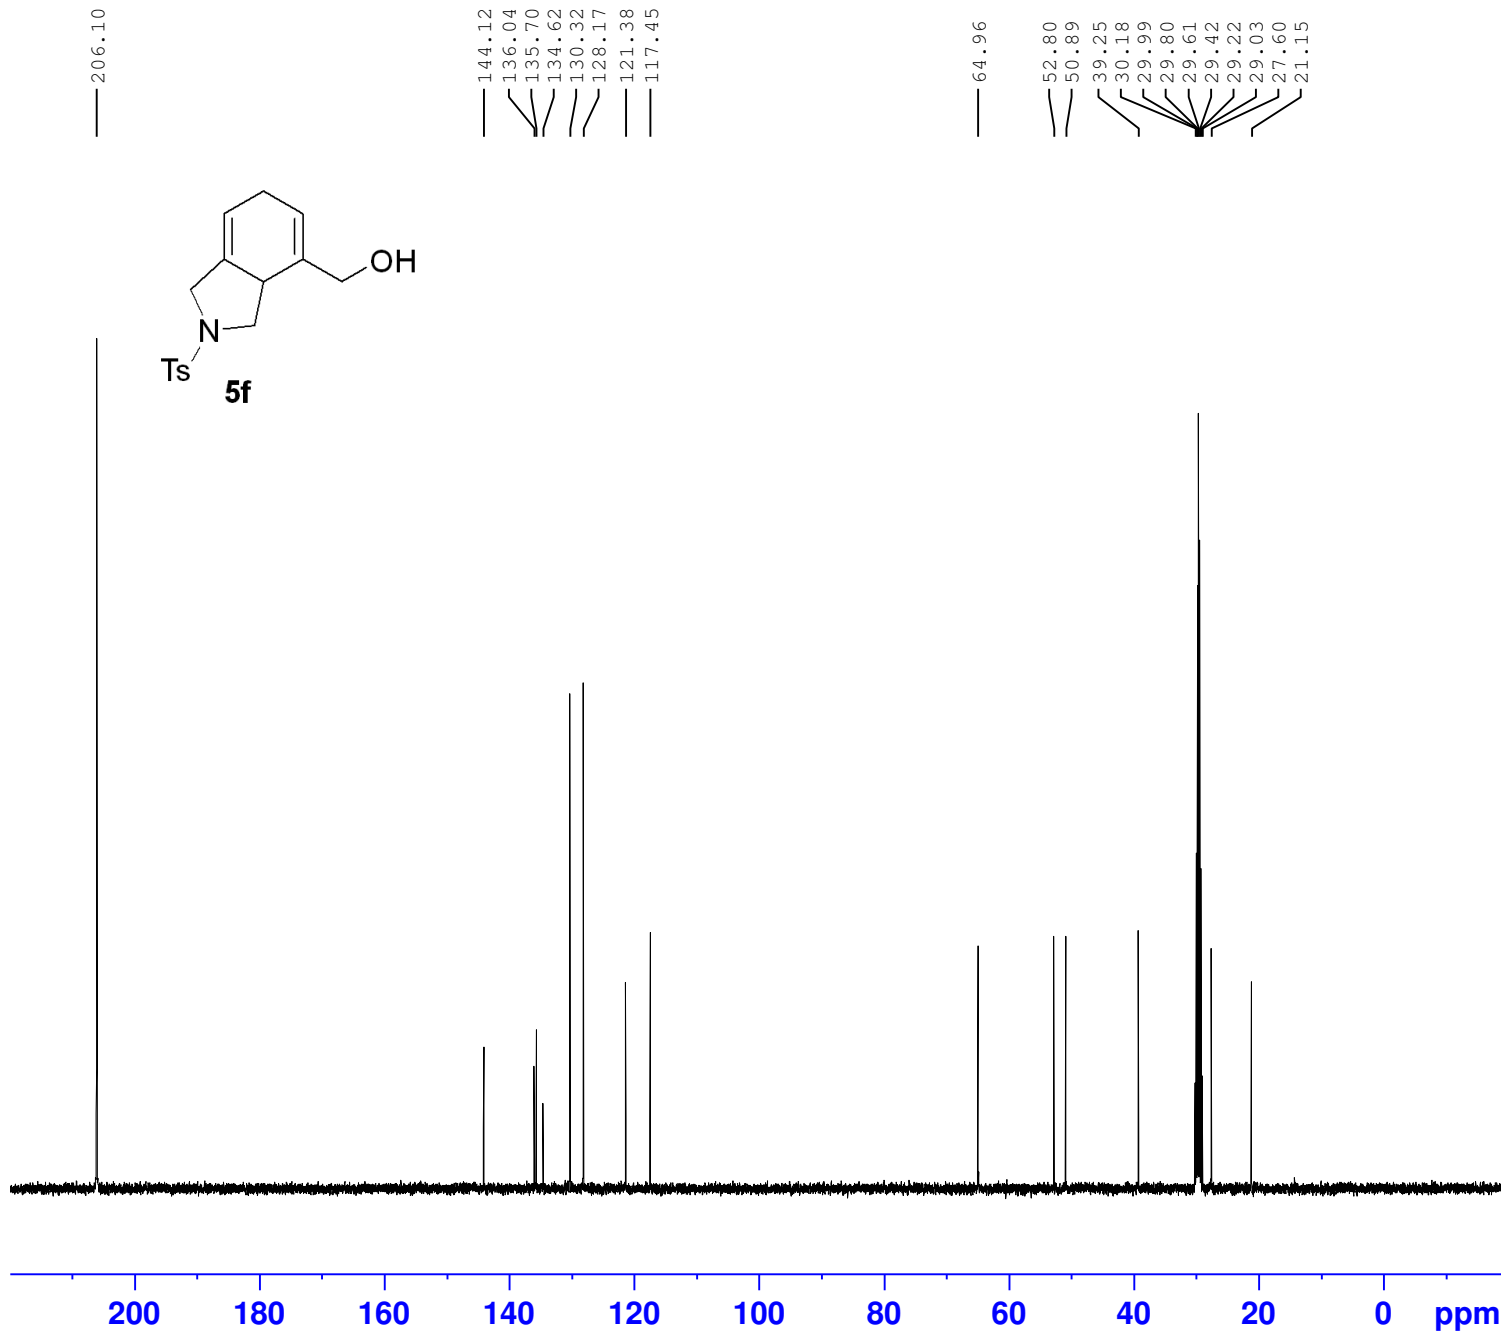

Current Data Parameters  
NAME 3-32  
EXPNO 37  
PROCNO 1

F2 - Acquisition Parameters  
Date\_ 20211029  
Time 14.53  
INSTRUM spect  
PROBHD 5 mm PABBO BB-  
PULPROG zgpg30  
TD 65536  
SOLVENT Acetone  
NS 60  
DS 4  
SWH 24038.461 Hz  
FIDRES 0.366798 Hz  
AQ 1.3631488 sec  
RG 193.13  
DW 20.800 usec  
DE 6.50 usec  
TE 294.6 K  
D1 2.00000000 sec  
D11 0.03000000 sec  
TD0 1

==== CHANNEL f1 =====  
NUC1 13C  
P1 9.90 usec  
PLW1 53.00000000 W  
SFO1 100.6379178 MHz

==== CHANNEL f2 =====  
CPDPRG[2] waltz16  
NUC2 1H  
PCPD2 90.00 usec  
PLW2 14.00000000 W  
PLW12 0.35839999 W  
PLW13 0.29030001 W  
SFO2 400.1916008 MHz

F2 - Processing parameters  
SI 32768  
SF 100.6277995 MHz  
WDW EM  
SSB 0  
LB 1.00 Hz  
GB 0  
PC 1.40

YZK-3-85

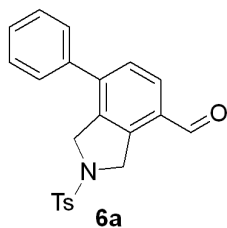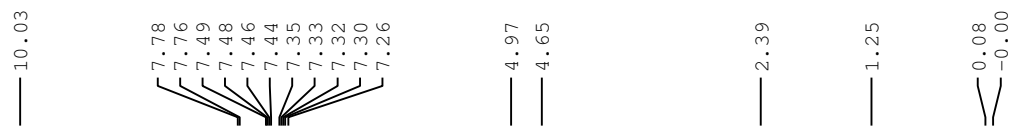

Current Data Parameters  
NAME 3-85  
EXPNO 232  
PROCNO 1

F2 - Acquisition Parameters  
Date\_ 20211214  
Time 19.51  
INSTRUM spect  
PROBHD 5 mm PABBO BB-  
PULPROG zg30  
TD 65536  
SOLVENT CDCl3  
NS 8  
DS 2  
SWH 8223.685 Hz  
FIDRES 0.125483 Hz  
AQ 3.9845889 sec  
RG 68.24  
DW 60.800 usec  
DE 6.50 usec  
TE 292.5 K  
D1 1.00000000 sec  
TD0 1

==== CHANNEL f1 =====  
NUC1 1H  
P1 14.40 usec  
PLW1 14.00000000 W  
SFO1 400.1924713 MHz

F2 - Processing parameters  
SI 65536  
SF 400.1900179 MHz  
WDW EM  
SSB 0  
LB 0.30 Hz  
GB 0  
PC 1.00

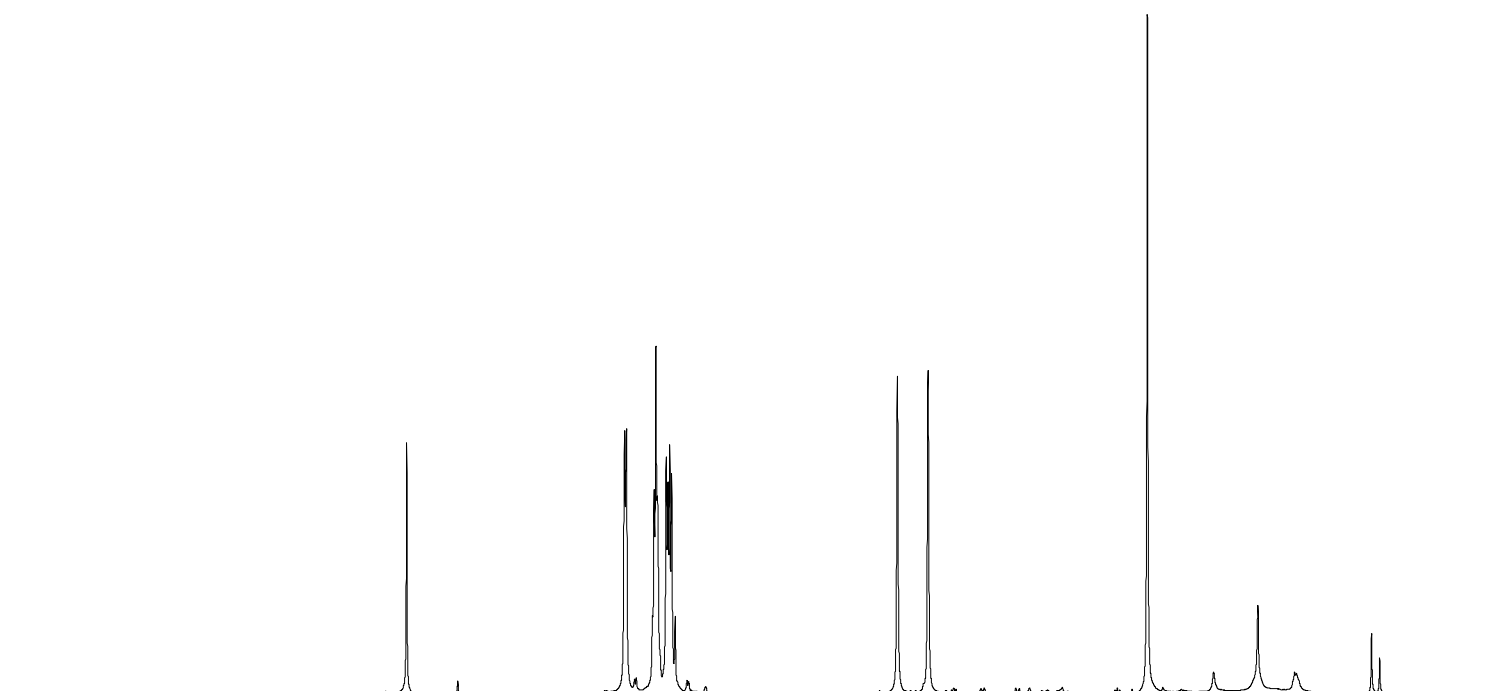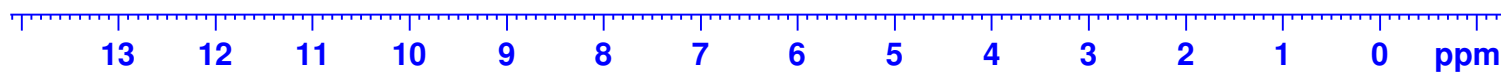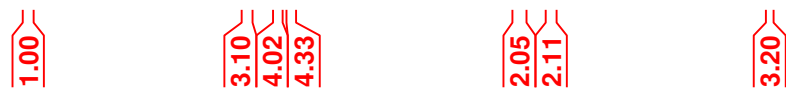

YZK-3-85

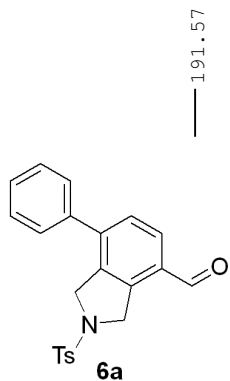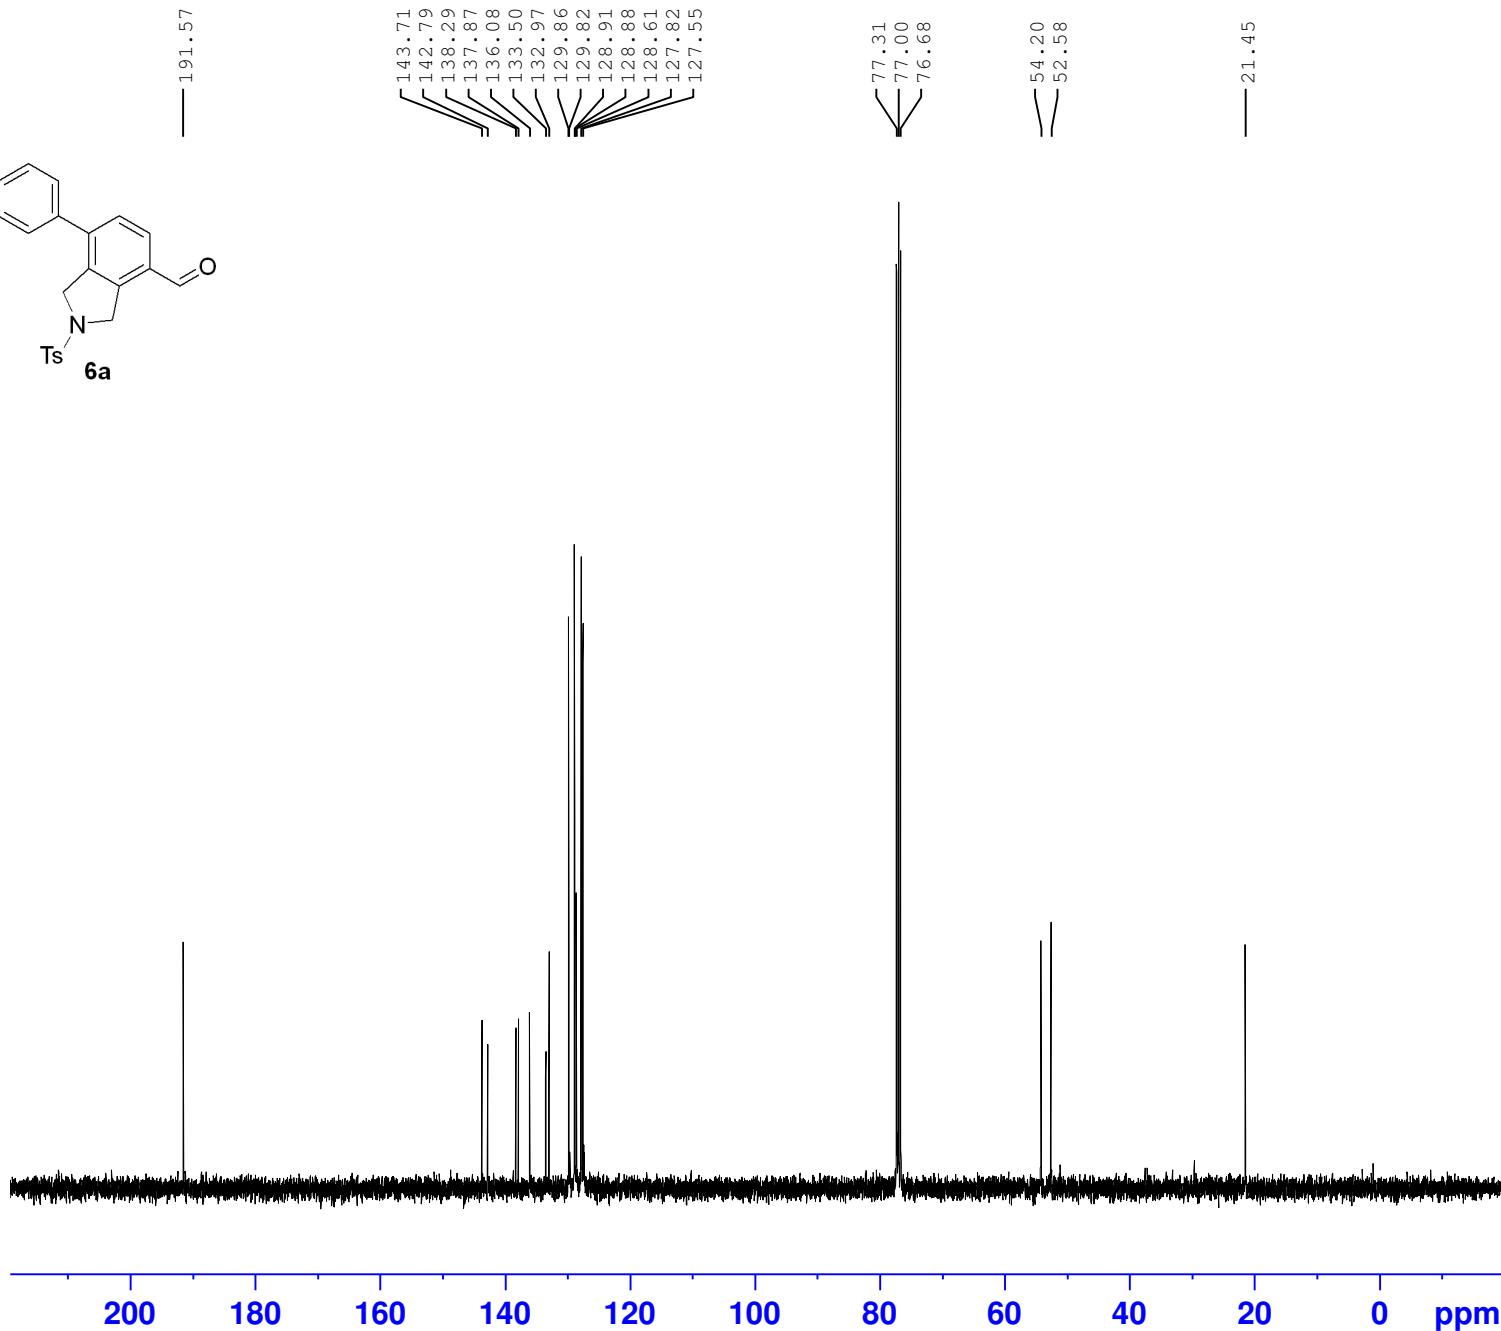

Current Data Parameters  
NAME 6a-yzk-3-85-C  
EXPNO 1  
PROCNO 1

F2 - Acquisition Parameters  
Date\_ 20211214  
Time 19.56  
INSTRUM spect  
PROBHD 5 mm PABBO BB-  
PULPROG zgpg30  
TD 65536  
SOLVENT CDC13  
NS 110  
DS 4  
SWH 24038.461 Hz  
FIDRES 0.366798 Hz  
AQ 1.3631488 sec  
RG 193.13  
DW 20.800 usec  
DE 6.50 usec  
TE 293.0 K  
D1 2.00000000 sec  
D11 0.03000000 sec  
TD0 1

==== CHANNEL f1 =====  
NUC1 13C  
P1 9.90 usec  
PLW1 53.00000000 W  
SFO1 100.6379178 MHz

==== CHANNEL f2 =====  
CPDPRG[2] waltz16  
NUC2 1H  
PCPD2 90.00 usec  
PLW2 14.00000000 W  
PLW12 0.35839999 W  
PLW13 0.29030001 W  
SFO2 400.1916008 MHz

F2 - Processing parameters  
SI 32768  
SF 100.6278682 MHz  
WDW EM  
SSB 0  
LB 1.00 Hz  
GB 0  
PC 1.40



3sjwei 5710 yzk-3-74-mno2 1h cdcl3

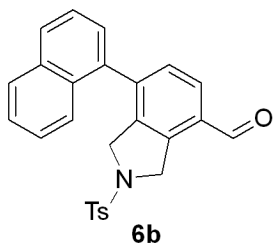

10.10  
7.96  
7.94  
7.85  
7.83  
7.70  
7.67  
7.57  
7.54  
7.52  
7.48  
7.46  
7.44  
7.43  
7.41  
7.40  
7.39  
7.38  
7.35  
7.32  
7.29  
7.27  
7.26  
5.04  
5.03  
4.38  
4.34  
4.31  
4.26  
2.40  
0.08  
0.00

Current Data Parameters  
NAME 3-74  
EXPNO 5710  
PROCNO 1

F2 - Acquisition Parameters

Date\_ 20211211  
Time 9.32  
INSTRUM spect  
PROBHD 5 mm PABBO BB-  
PULPROG zg30  
TD 65536  
SOLVENT CDCl3  
NS 16  
DS 2  
SWH 6009.615 Hz  
FIDRES 0.091699 Hz  
AQ 5.4525952 sec  
RG 128  
DW 83.200 usec  
DE 6.50 usec  
TE -59.1 K  
D1 1.00000000 sec  
TD0 1

==== CHANNEL f1 =====

SFO1 300.1318534 MHz  
NUC1 1H  
P1 10.00 usec  
PLW1 14.00000000 W

F2 - Processing parameters

SI 65536  
SF 300.1300074 MHz  
WDW EM  
SSB 0  
LB 0.30 Hz  
GB 0  
PC 1.00

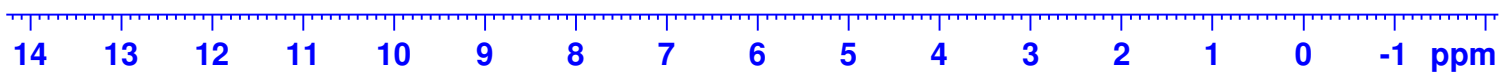

1.00  
2.09  
1.08  
1.99  
2.11  
6.62  
2.03  
1.98  
3.15

3sjwei 5711 yzk-3-74-mno2 13c cdcl3

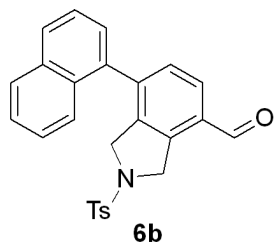

191.65

143.65  
141.78  
137.94  
137.42  
135.86  
133.62  
133.53  
132.63  
130.34  
130.25  
129.78  
129.01  
128.66  
127.54  
126.72  
126.30  
126.10  
125.28  
124.85

77.42  
77.00  
76.57

54.55  
52.49

21.47

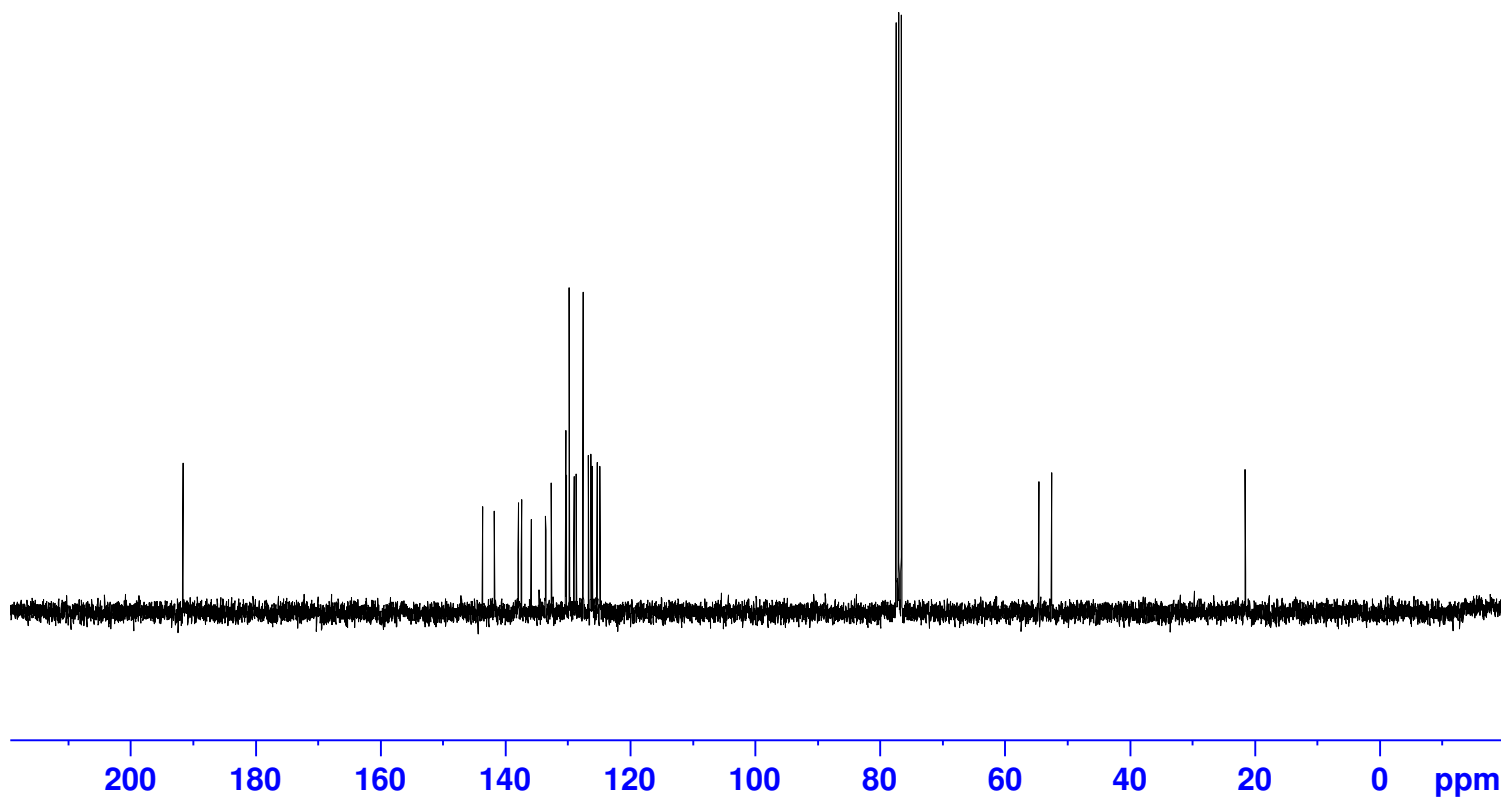

Current Data Parameters  
NAME 3-74  
EXPNO 5711  
PROCNO 1

F2 - Acquisition Parameters  
Date\_ 20211211  
Time 9.41  
INSTRUM spect  
PROBHD 5 mm PABBO BB-  
PULPROG zgpg30  
TD 65536  
SOLVENT CDC13  
NS 100  
DS 4  
SWH 18028.846 Hz  
FIDRES 0.275098 Hz  
AQ 1.8175317 sec  
RG 203  
DW 27.733 usec  
DE 6.50 usec  
TE -59.1 K  
D1 2.0000000 sec  
D11 0.0300000 sec  
TD0 1

==== CHANNEL f1 =====  
SFO1 75.4752949 MHz  
NUC1 13C  
P1 9.50 usec  
PLW1 34.20000076 W

==== CHANNEL f2 =====  
SFO2 300.1312005 MHz  
NUC2 1H  
CPDPRG[2] waltz16  
PCPD2 90.00 usec  
PLW2 14.00000000 W  
PLW12 0.17284000 W  
PLW13 0.14000000 W

F2 - Processing parameters  
SI 32768  
SF 75.4677556 MHz  
WDW EM  
SSB 0  
LB 1.00 Hz  
GB 0  
PC 1.40

3sjwei 5741yzk-3-92-fr-mno2 1h cdcl3

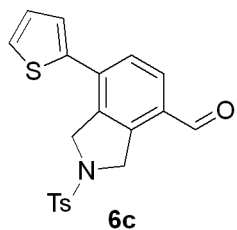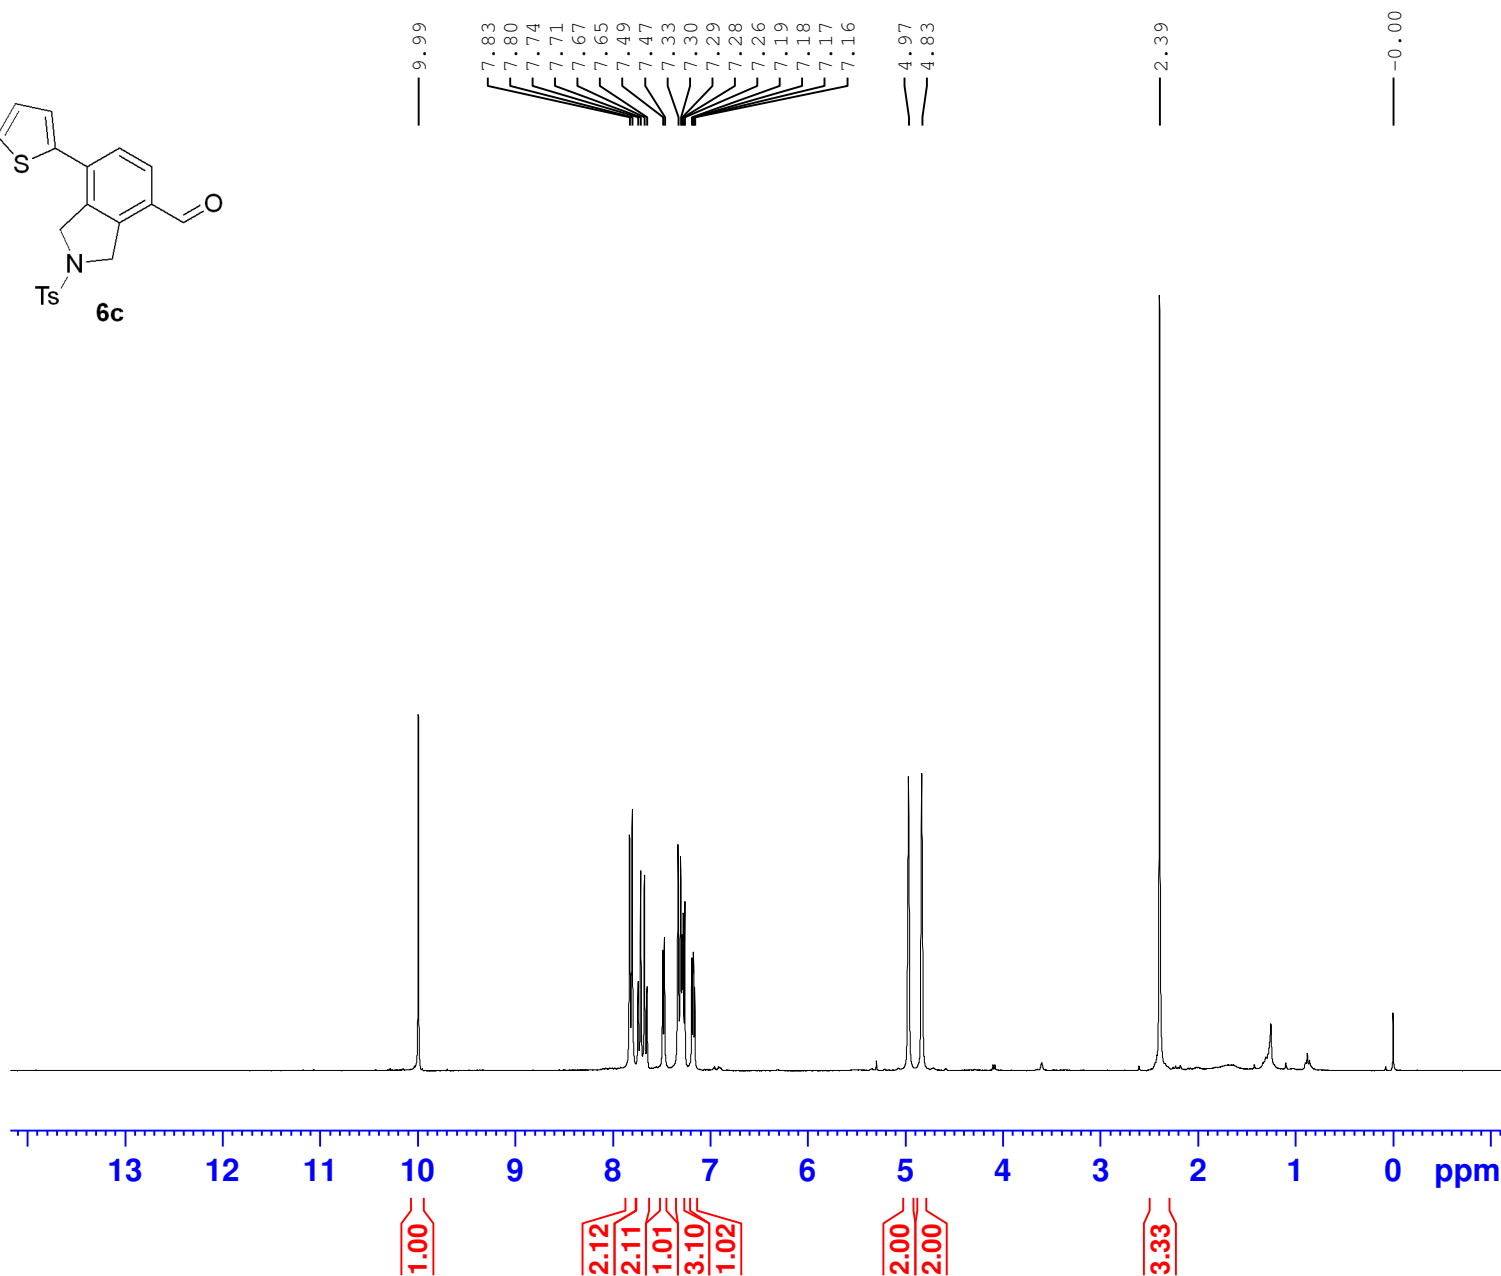

Current Data Parameters  
NAME 3-92  
EXPNO 5741  
PROCNO 1

F2 - Acquisition Parameters  
Date\_ 20211223  
Time 11.30  
INSTRUM spect  
PROBHD 5 mm PABBO BB-  
PULPROG zg30  
TD 65536  
SOLVENT CDC13  
NS 16  
DS 2  
SWH 6009.615 Hz  
FIDRES 0.091699 Hz  
AQ 5.4525952 sec  
RG 181  
DW 83.200 usec  
DE 6.50 usec  
TE -59.1 K  
D1 1.00000000 sec  
TD0 1

==== CHANNEL f1 =====  
SFO1 300.1318534 MHz  
NUC1 1H  
P1 10.00 usec  
PLW1 14.00000000 W

F2 - Processing parameters  
SI 65536  
SF 300.1300073 MHz  
WDW EM  
SSB 0  
LB 0.30 Hz  
GB 0  
PC 1.00

3sjwei 5742 yzk-3-92-fr-mno2 13c cdcl3

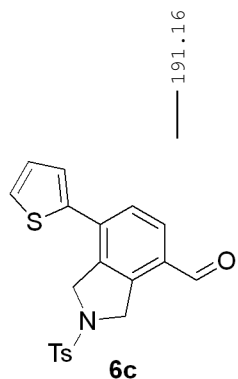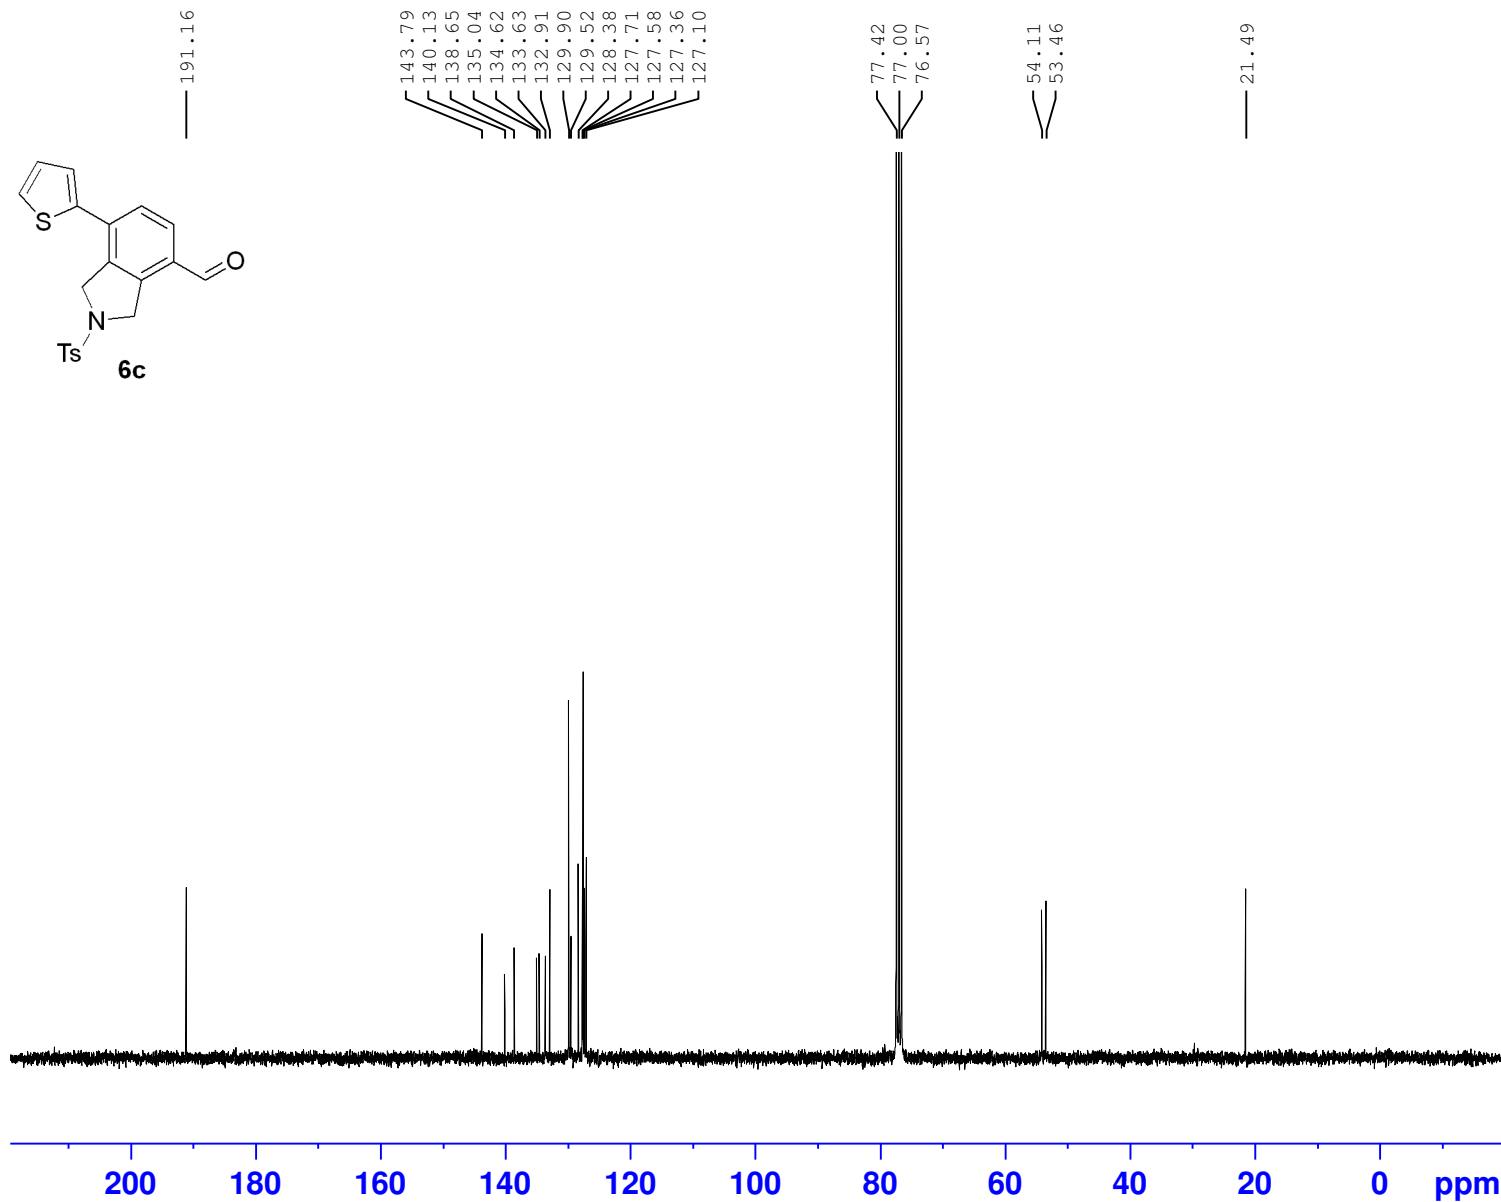

Current Data Parameters  
NAME 3-92  
EXPNO 5742  
PROCNO 1

F2 - Acquisition Parameters  
Date\_ 20211223  
Time 12.37  
INSTRUM spect  
PROBHD 5 mm PABBO BB-  
PULPROG zgpg30  
TD 65536  
SOLVENT CDC13  
NS 1024  
DS 4  
SWH 18028.846 Hz  
FIDRES 0.275098 Hz  
AQ 1.8175317 sec  
RG 203  
DW 27.733 usec  
DE 6.50 usec  
TE -59.1 K  
D1 2.00000000 sec  
D11 0.03000000 sec  
TD0 1

==== CHANNEL f1 =====  
SFO1 75.4752949 MHz  
NUC1 13C  
P1 9.50 usec  
PLW1 34.20000076 W

==== CHANNEL f2 =====  
SFO2 300.1312005 MHz  
NUC2 1H  
CPDPRG[2] waltz16  
PCPD2 90.00 usec  
PLW2 14.00000000 W  
PLW12 0.17284000 W  
PLW13 0.14000000 W

F2 - Processing parameters  
SI 32768  
SF 75.4677530 MHz  
WDW EM  
SSB 0  
LB 1.00 Hz  
GB 0  
PC 1.40

YZK-3-57-MnO2

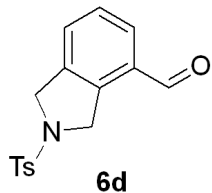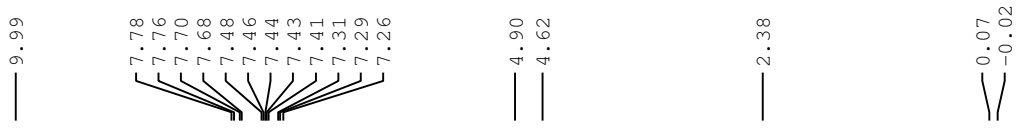

Current Data Parameters  
NAME 3-57  
EXPNO 155  
PROCNO 1

F2 - Acquisition Parameters  
Date\_ 20211129  
Time 20.00  
INSTRUM spect  
PROBHD 5 mm PABBO BB-  
PULPROG zg30  
TD 65536  
SOLVENT CDCl3  
NS 16  
DS 2  
SWH 8223.685 Hz  
FIDRES 0.125483 Hz  
AQ 3.9845889 sec  
RG 61.19  
DW 60.800 usec  
DE 6.50 usec  
TE 292.9 K  
D1 1.00000000 sec  
TD0 1

==== CHANNEL f1 =====  
NUC1 1H  
P1 14.40 usec  
PLW1 14.00000000 W  
SFO1 400.1924713 MHz

F2 - Processing parameters  
SI 65536  
SF 400.1900162 MHz  
WDW EM  
SSB 0  
LB 0.30 Hz  
GB 0  
PC 1.00

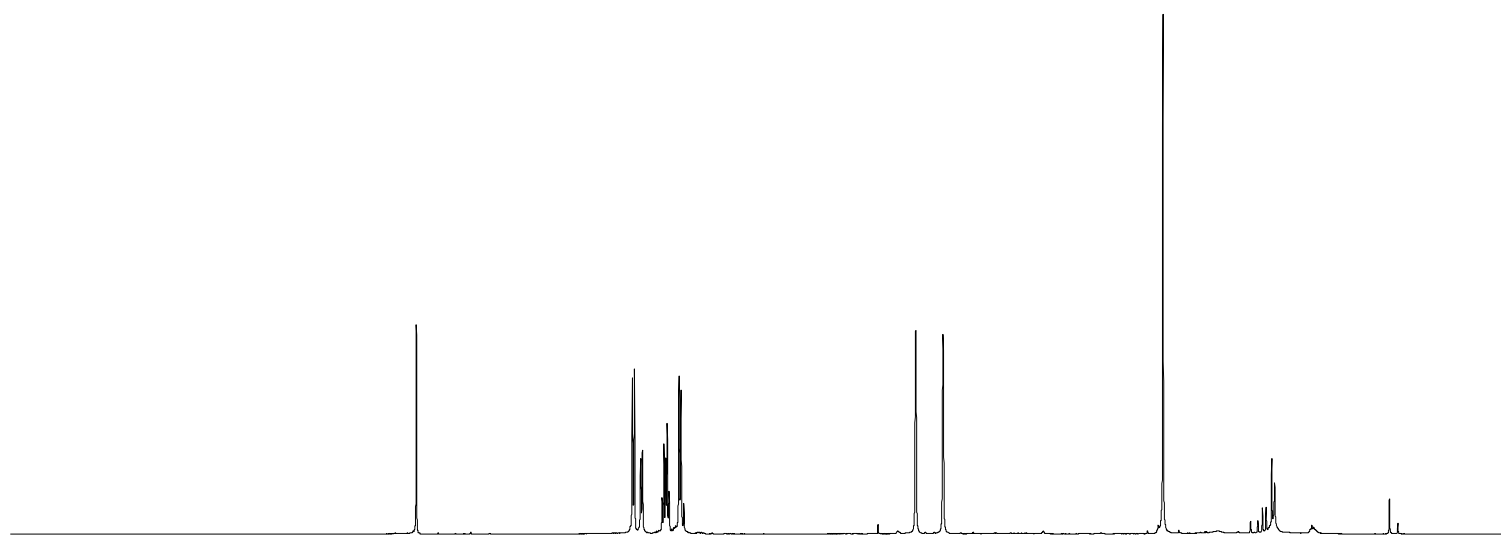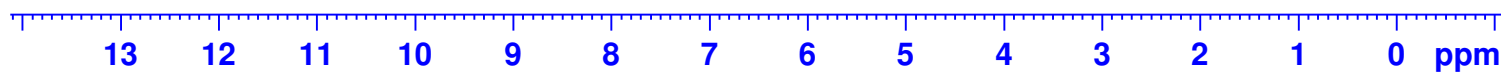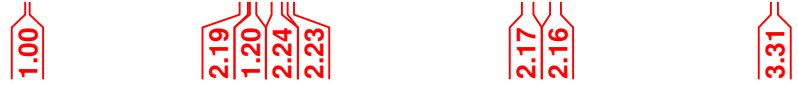

YZK-3-57-MnO2

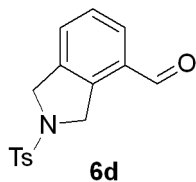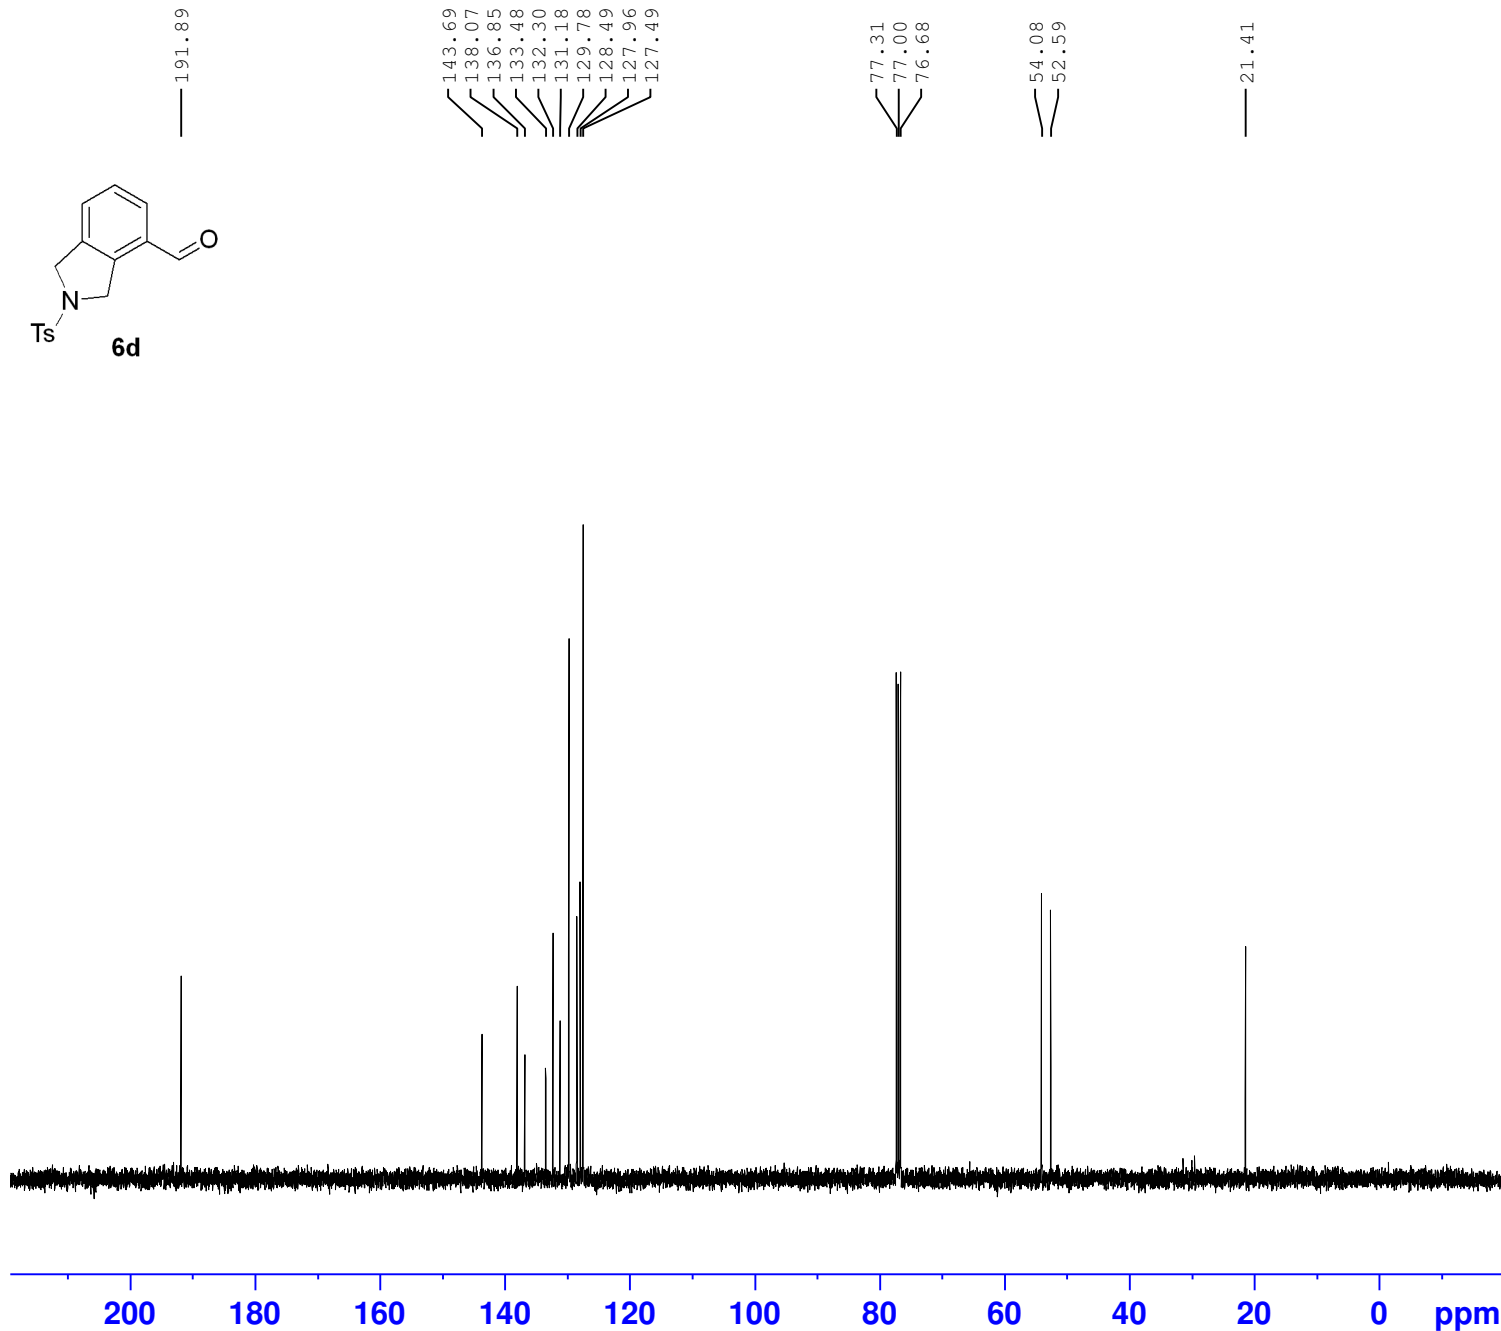

Current Data Parameters  
NAME 3-57  
EXPNO 156  
PROCNO 1

F2 - Acquisition Parameters  
Date\_ 20211129  
Time 20.03  
INSTRUM spect  
PROBHD 5 mm PABBO BB-  
PULPROG zgpg30  
TD 65536  
SOLVENT CDC13  
NS 38  
DS 4  
SWH 24038.461 Hz  
FIDRES 0.366798 Hz  
AQ 1.3631488 sec  
RG 193.13  
DW 20.800 usec  
DE 6.50 usec  
TE 293.4 K  
D1 2.00000000 sec  
D11 0.03000000 sec  
TD0 1

==== CHANNEL f1 =====  
NUC1 13C  
P1 9.90 usec  
PLW1 53.00000000 W  
SFO1 100.6379178 MHz

==== CHANNEL f2 =====  
CPDPRG[2] waltz16  
NUC2 1H  
PCPD2 90.00 usec  
PLW2 14.00000000 W  
PLW12 0.35839999 W  
PLW13 0.29030001 W  
SFO2 400.1916008 MHz

F2 - Processing parameters  
SI 32768  
SF 100.6278702 MHz  
WDW EM  
SSB 0  
LB 1.00 Hz  
GB 0  
PC 1.40

YZK-4-64

7.71  
7.68  
7.63  
7.62  
7.60  
7.60  
7.46  
7.44  
7.42  
7.40  
7.38  
7.33  
7.31  
7.30  
7.28  
7.26  
7.25  
7.23  
7.21  
7.19  
7.17  
6.21  
6.18  
6.18  
6.15  
5.55  
4.25  
4.22  
4.21  
4.19  
4.19  
4.17  
4.00  
3.92  
3.47  
3.45  
3.45  
3.42  
3.28  
3.03  
2.98  
2.79  
2.78  
2.77  
2.65  
2.64  
2.63  
2.62  
2.60  
2.59  
2.59  
2.58  
2.57  
2.56  
2.56  
2.55  
2.42  
2.40  
2.06  
2.04  
2.02  
1.99  
1.77  
1.69  
1.25

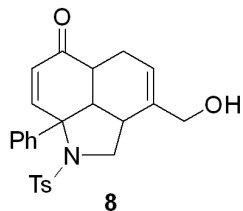

Current Data Parameters  
NAME 0701  
EXPNO 143  
PROCNO 1

F2 - Acquisition Parameters  
Date\_ 20220701  
Time 19.49  
INSTRUM spect  
PROBHD 5 mm PABBO BB-  
PULPROG zg30  
TD 32768  
SOLVENT CDC13  
NS 8  
DS 2  
SWH 8223.685 Hz  
FIDRES 0.250967 Hz  
AQ 1.9922944 sec  
RG 75.43  
DW 60.800 usec  
DE 6.50 usec  
TE 294.7 K  
D1 1.00000000 sec  
TD0 1

==== CHANNEL f1 =====  
NUC1 1H  
P1 14.68 usec  
PLW1 14.00000000 W  
SFO1 400.1924713 MHz

F2 - Processing parameters  
SI 65536  
SF 400.1900247 MHz  
WDW EM  
SSB 0  
LB 0.30 Hz  
GB 0  
PC 1.00

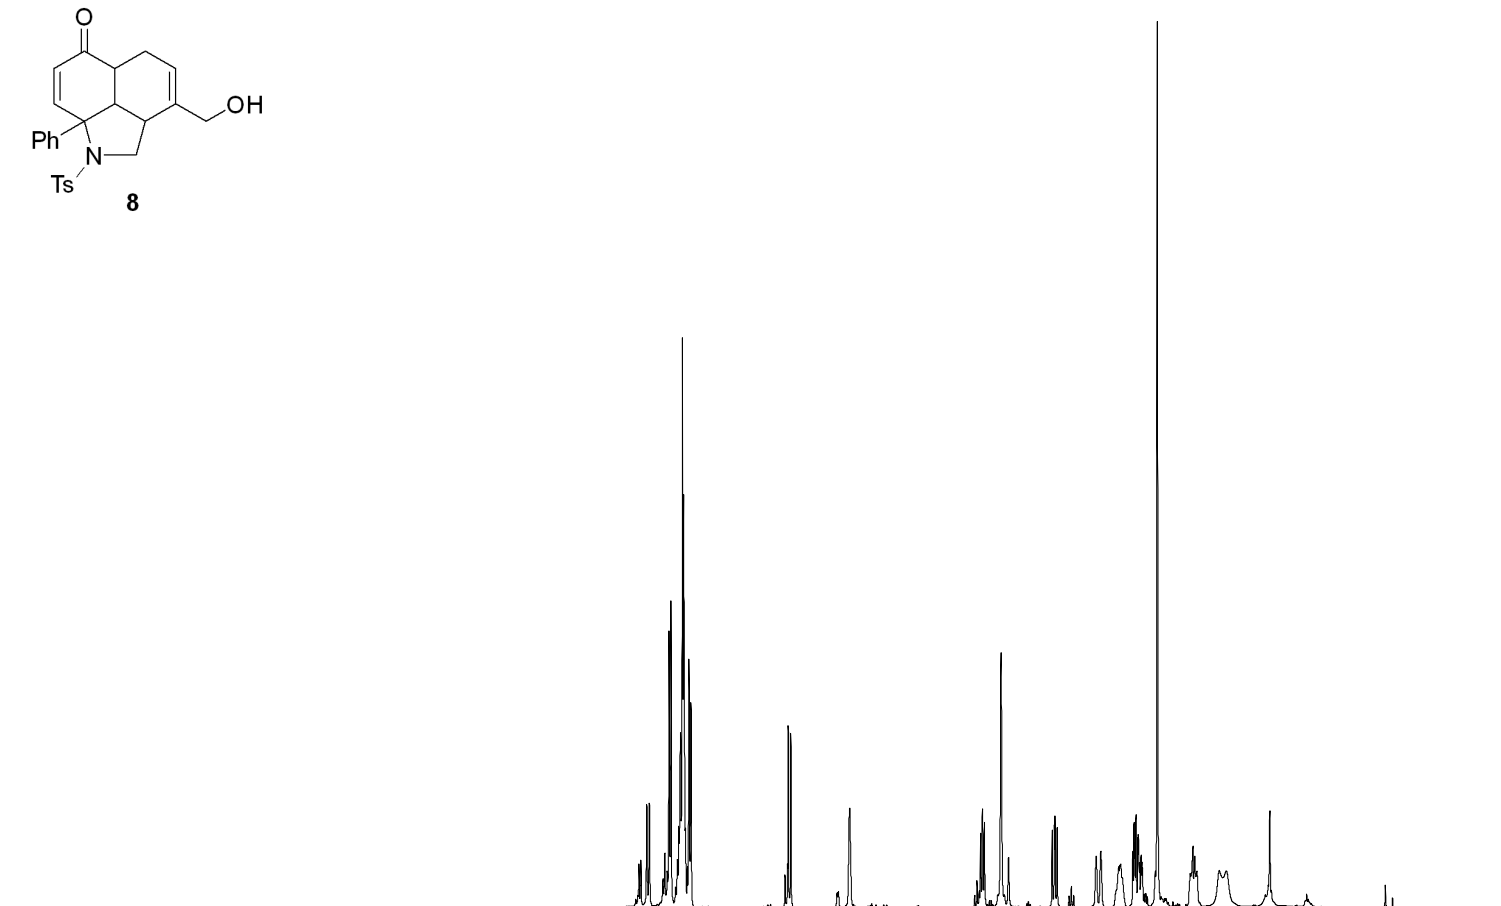

13 12 11 10 9 8 7 6 5 4 3 2 1 0 ppm

0.33  
1.04  
2.82  
6.28  
2.03  
0.19  
0.92  
0.16  
1.00  
0.18  
1.03  
2.00  
0.33  
0.99  
0.17  
1.00  
1.19  
2.19  
3.56  
1.48  
1.96

YZK-4-64

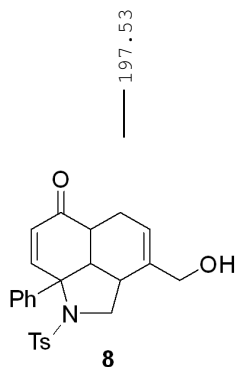

197.53

147.94  
146.29  
143.67  
143.58  
143.11  
140.40  
137.42  
136.21  
135.53  
129.51  
129.33  
129.20  
128.64  
128.43  
127.92  
127.81  
127.63  
126.99  
126.95  
126.30  
126.07  
124.35  
123.20  
77.31  
77.00  
76.68  
69.87  
66.13  
65.05  
56.05  
54.66  
54.49  
51.98  
39.81  
39.26  
37.79  
34.87  
23.59  
23.47  
21.44

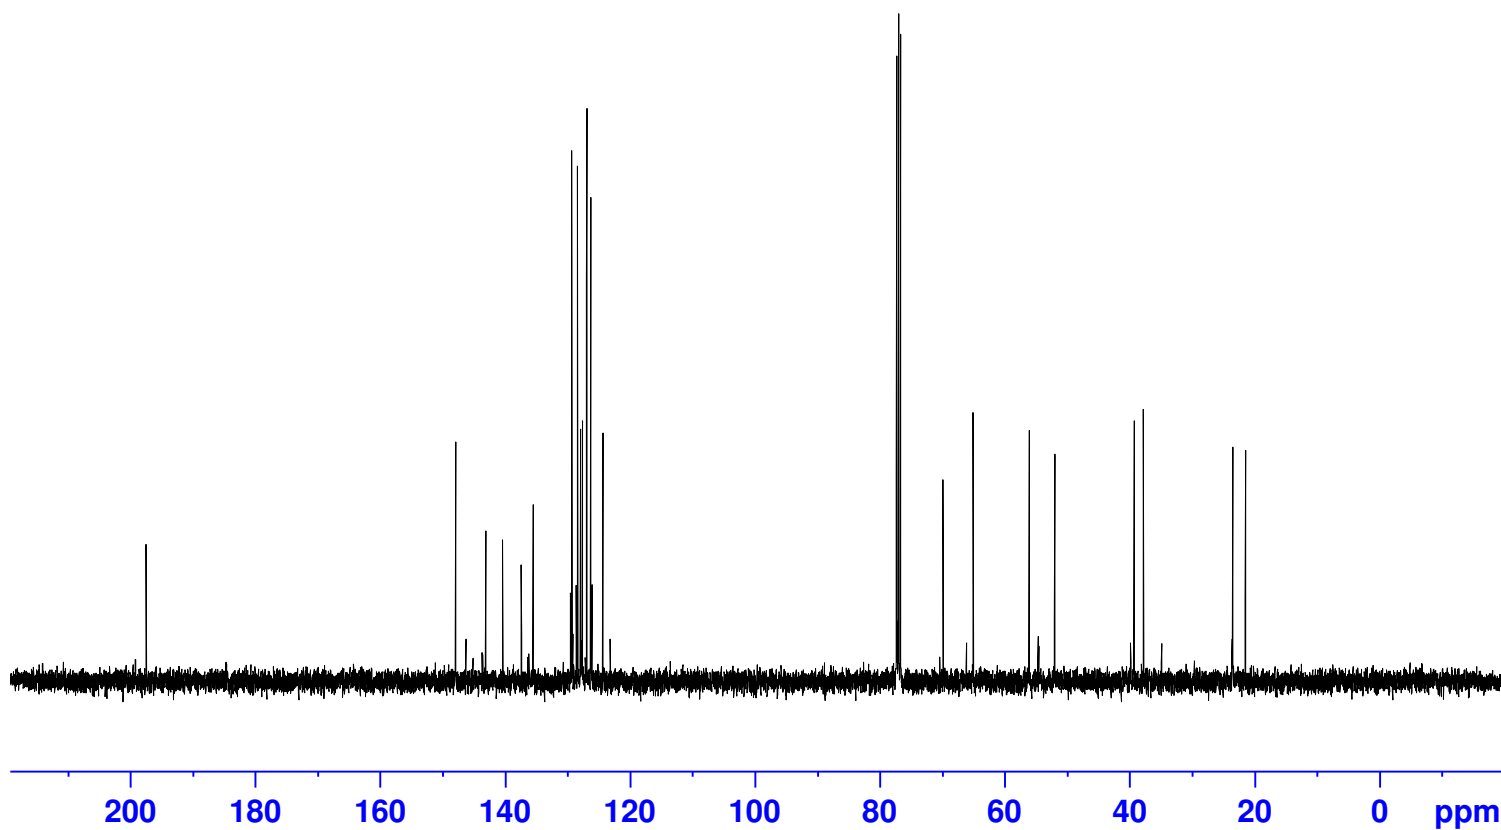

Current Data Parameters  
NAME 8-yzk-4-64-C  
EXPNO 1  
PROCNO 1

F2 - Acquisition Parameters  
Date\_ 20220701  
Time 19.53  
INSTRUM spect  
PROBHD 5 mm PABBO BB-  
PULPROG zgpg30  
TD 32768  
SOLVENT CDC13  
NS 100  
DS 4  
SWH 24038.461 Hz  
FIDRES 0.733596 Hz  
AQ 0.6815744 sec  
RG 193.13  
DW 20.800 usec  
DE 6.50 usec  
TE 295.3 K  
D1 1.00000000 sec  
D11 0.03000000 sec  
TD0 1

==== CHANNEL f1 =====  
NUC1 13C  
P1 12.00 usec  
PLW1 53.00000000 W  
SFO1 100.6379178 MHz

==== CHANNEL f2 =====  
CPDPRG[2] waltz16  
NUC2 1H  
PCPD2 90.00 usec  
PLW2 14.00000000 W  
PLW12 0.37246999 W  
PLW13 0.30170000 W  
SFO2 400.1916008 MHz

F2 - Processing parameters  
SI 32768  
SF 100.6278667 MHz  
WDW EM  
SSB 0  
LB 1.00 Hz  
GB 0  
PC 1.40



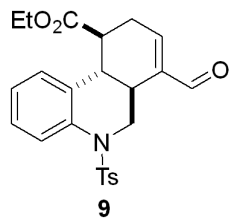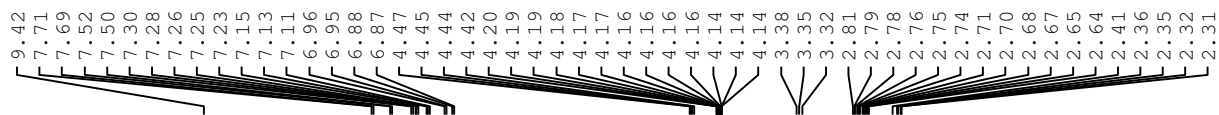

Current Data Parameters  
 NAME 0605  
 EXPNO 2  
 PROCNO 1

F2 - Acquisition Parameters  
 Date\_ 20220606  
 Time 21.15 h  
 INSTRUM Avance  
 PROBHD z116098\_0833 (  
 PULPROG zg30  
 TD 65536  
 SOLVENT CDC13  
 NS 16  
 DS 2  
 SWH 8196.722 Hz  
 FIDRES 0.250144 Hz  
 AQ 3.9976959 sec  
 RG 82.3452  
 DW 61.000 usec  
 DE 13.54 usec  
 TE 292.8 K  
 D1 1.00000000 sec  
 TD0 1  
 SFO1 400.1324708 MHz  
 NUC1 1H  
 P0 3.33 usec  
 P1 10.00 usec  
 PLW1 20.73200035 W

F2 - Processing parameters  
 SI 65536  
 SF 400.1300013 MHz  
 WDW EM  
 SSB 0  
 LB 0.30 Hz  
 GB 0  
 PC 1.00

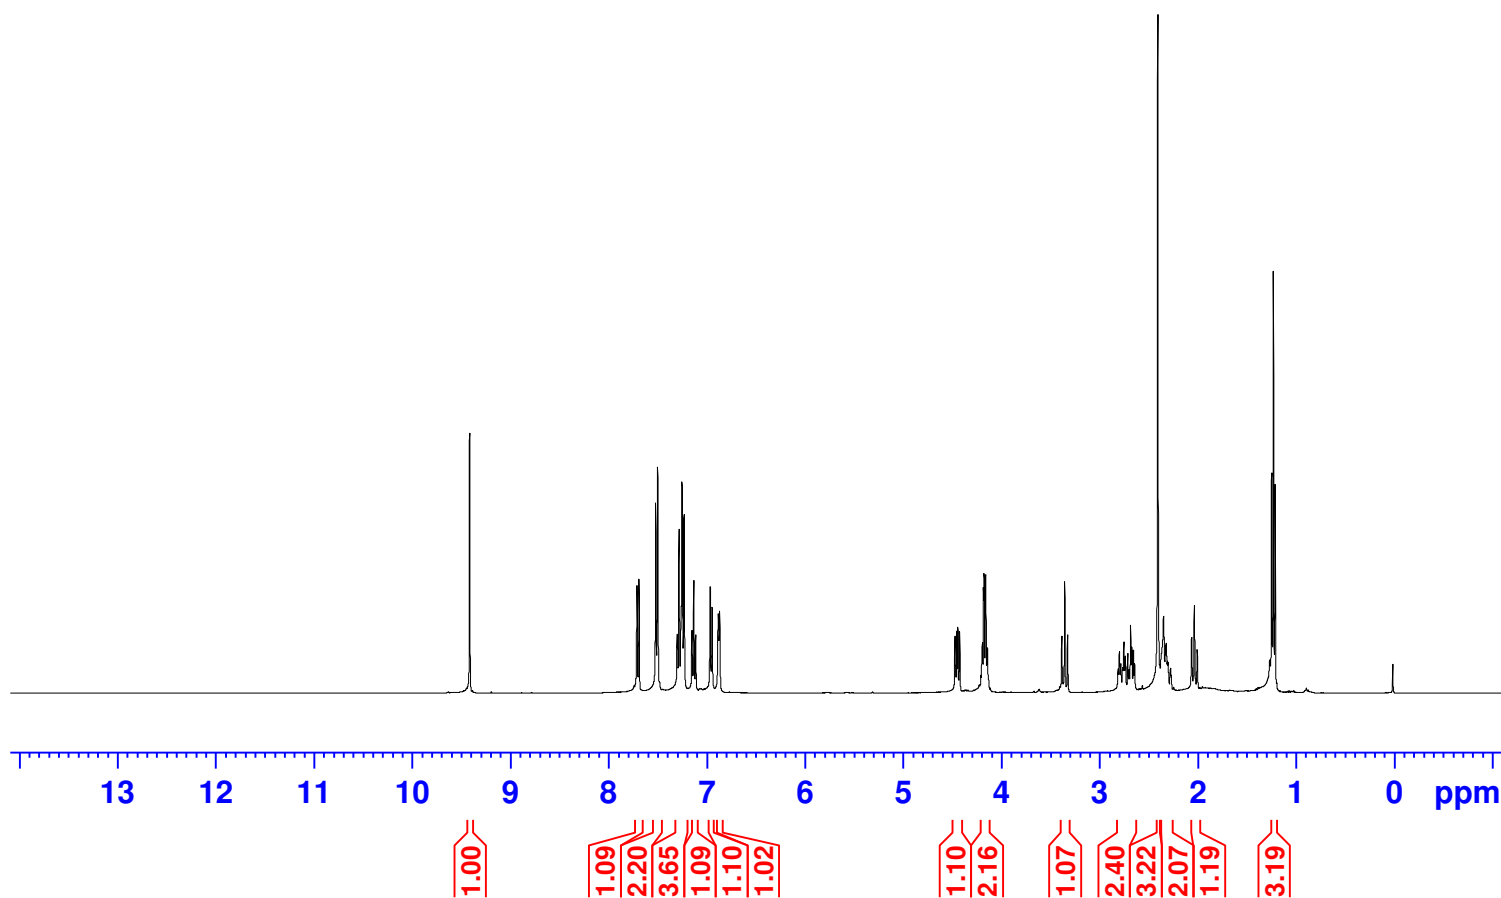

YZK-4-38

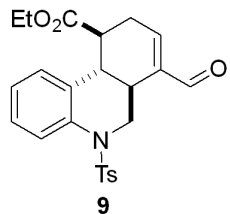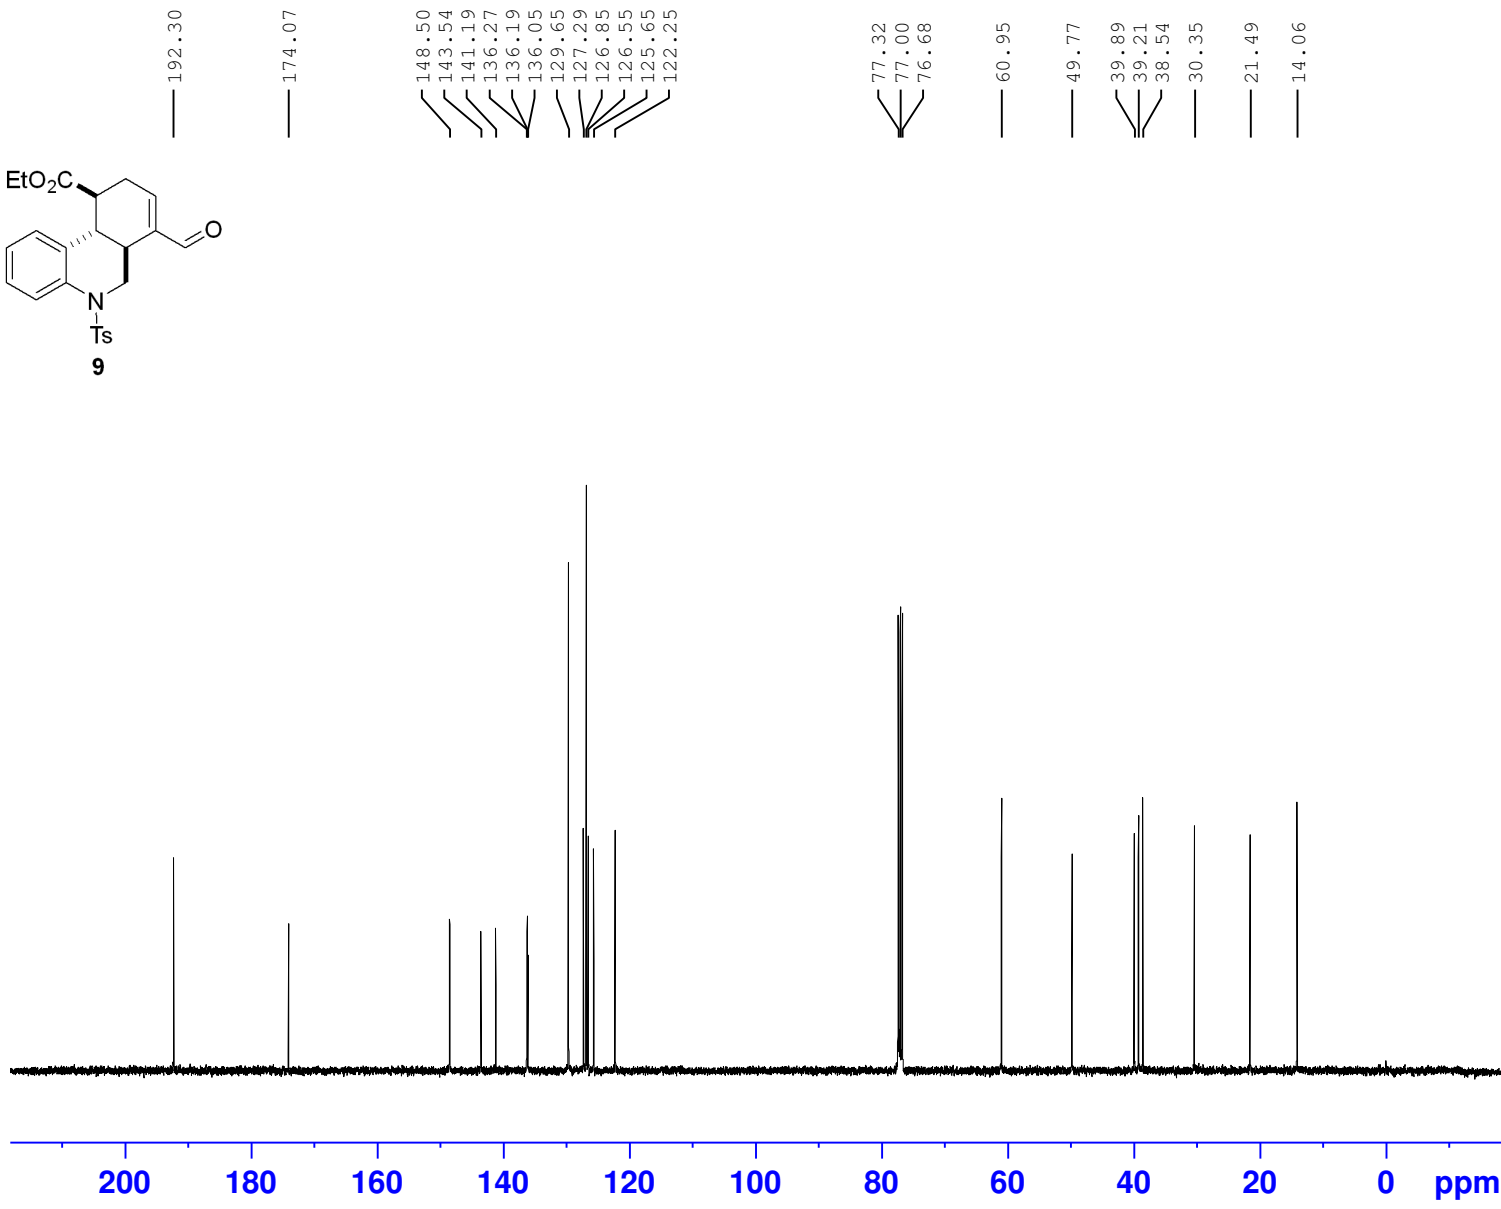

Current Data Parameters  
 NAME 11-yzk-4-38-C  
 EXPNO 1  
 PROCNO 1

F2 - Acquisition Parameters  
 Date\_ 20220605  
 Time 19.43 h  
 INSTRUM Avance  
 PROBHD z116098\_0833 (  
 PULPROG zgpg30  
 TD 65536  
 SOLVENT CDC13  
 NS 1024  
 DS 4  
 SWH 23809.523 Hz  
 FIDRES 0.726609 Hz  
 AQ 1.3762560 sec  
 RG 51.55  
 DW 21.000 usec  
 DE 6.50 usec  
 TE 298.4 K  
 D1 2.00000000 sec  
 D11 0.03000000 sec  
 TD0 1  
 SFO1 100.6228298 MHz  
 NUC1 13C  
 P0 3.33 usec  
 P1 10.00 usec  
 PLW1 87.89900208 W  
 SFO2 400.1316005 MHz  
 NUC2 1H  
 CPDPRG[2] waltz65  
 PCPD2 90.00 usec  
 PLW2 20.73200035 W  
 PLW12 0.25595000 W  
 PLW13 0.12874000 W

F2 - Processing parameters  
 SI 32768  
 SF 100.6127735 MHz  
 WDW EM  
 SSB 0  
 LB 1.00 Hz  
 GB 0  
 PC 1.40

3sjwei 5731 yzk-3-90 1h cdcl3

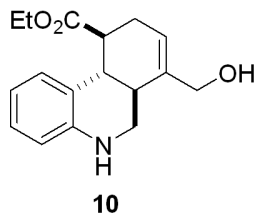

7.26  
7.01  
6.99  
6.96  
6.87  
6.85  
6.60  
6.60  
6.57  
6.55  
6.55  
6.49  
6.46  
6.46  
5.84  
5.82  
4.31  
4.30  
4.29  
4.27  
4.25  
4.23  
4.21  
4.19  
4.18  
4.17  
4.07  
4.05  
4.01  
3.79  
3.77  
3.75  
3.73  
3.16  
3.13  
3.12  
3.09  
3.05  
3.01  
2.98  
2.84  
2.83  
2.81  
2.79  
2.77  
2.75  
2.59  
2.56  
2.54  
2.52  
2.37

Current Data Parameters  
NAME 3-90  
EXPNO 5731  
PROCNO 1

F2 - Acquisition Parameters  
Date\_ 20211218  
Time 9.55  
INSTRUM spect  
PROBHD 5 mm PABBO BB-  
PULPROG zg30  
TD 65536  
SOLVENT CDC13  
NS 16  
DS 2  
SWH 6009.615 Hz  
FIDRES 0.091699 Hz  
AQ 5.4525952 sec  
RG 144  
DW 83.200 usec  
DE 6.50 usec  
TE -59.1 K  
D1 1.00000000 sec  
TD0 1

==== CHANNEL f1 =====  
SFO1 300.1318534 MHz  
NUC1 1H  
P1 10.00 usec  
PLW1 14.00000000 W

F2 - Processing parameters  
SI 65536  
SF 300.1300071 MHz  
WDW EM  
SSB 0  
LB 0.30 Hz  
GB 0  
PC 1.00

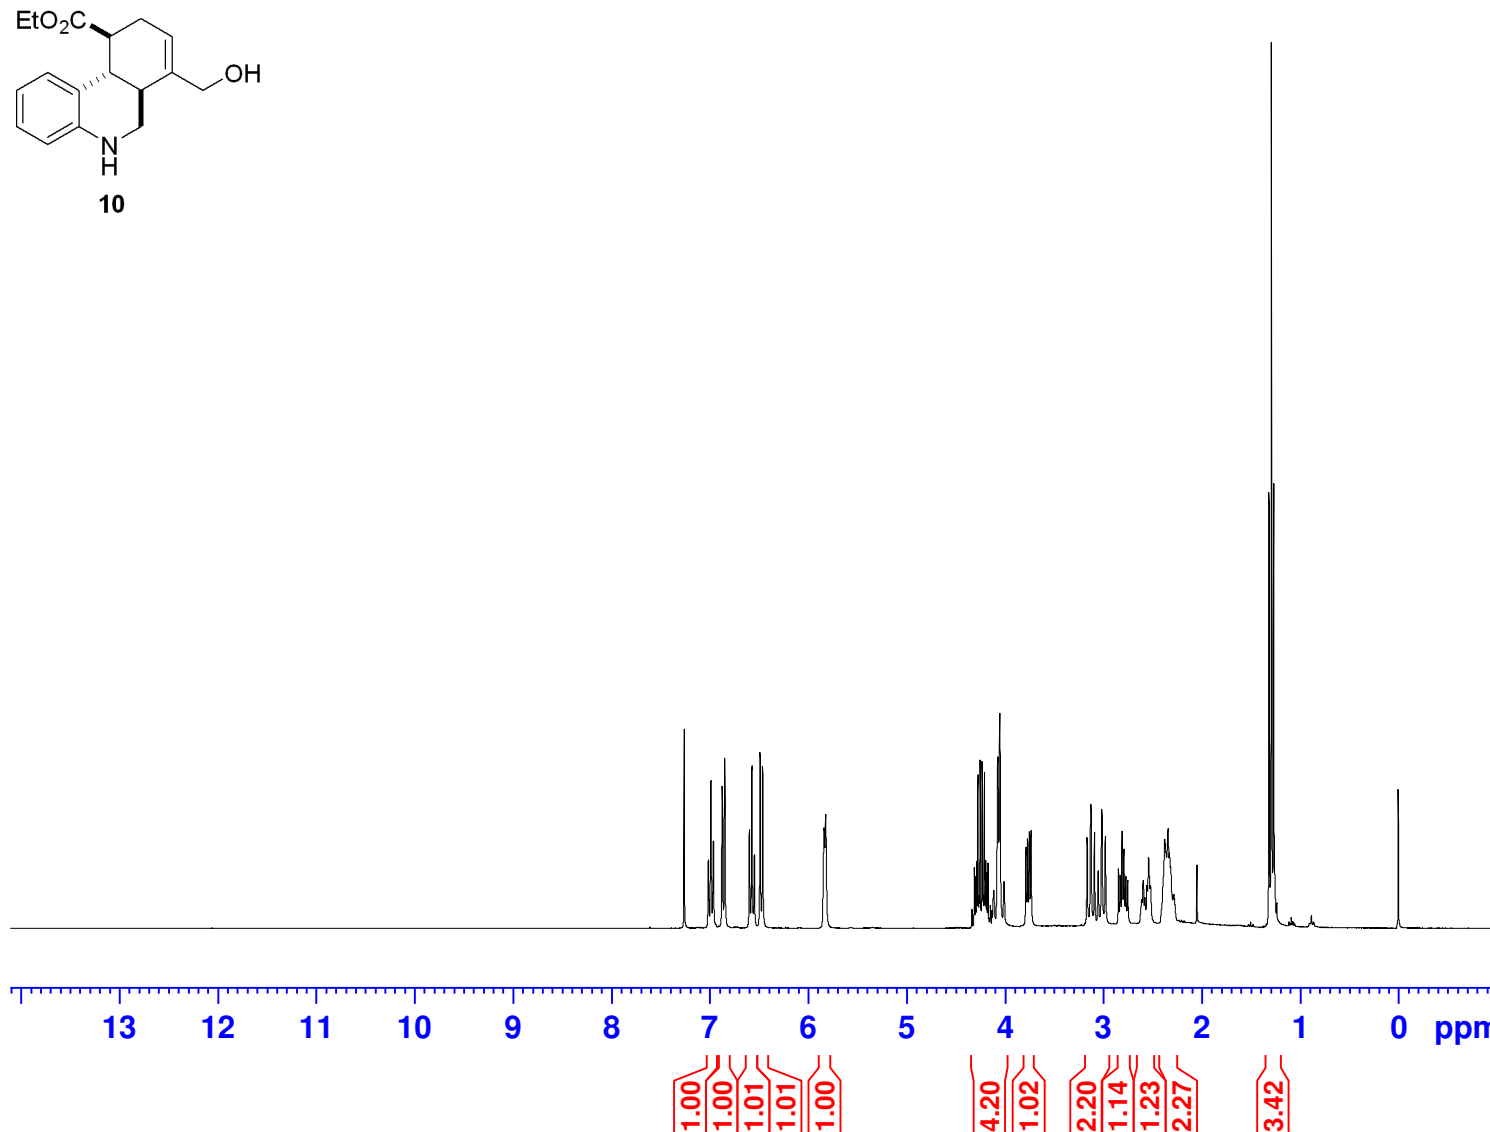

3sjwei 5732 yzk-3-90 13c cdcl3

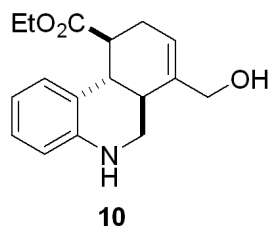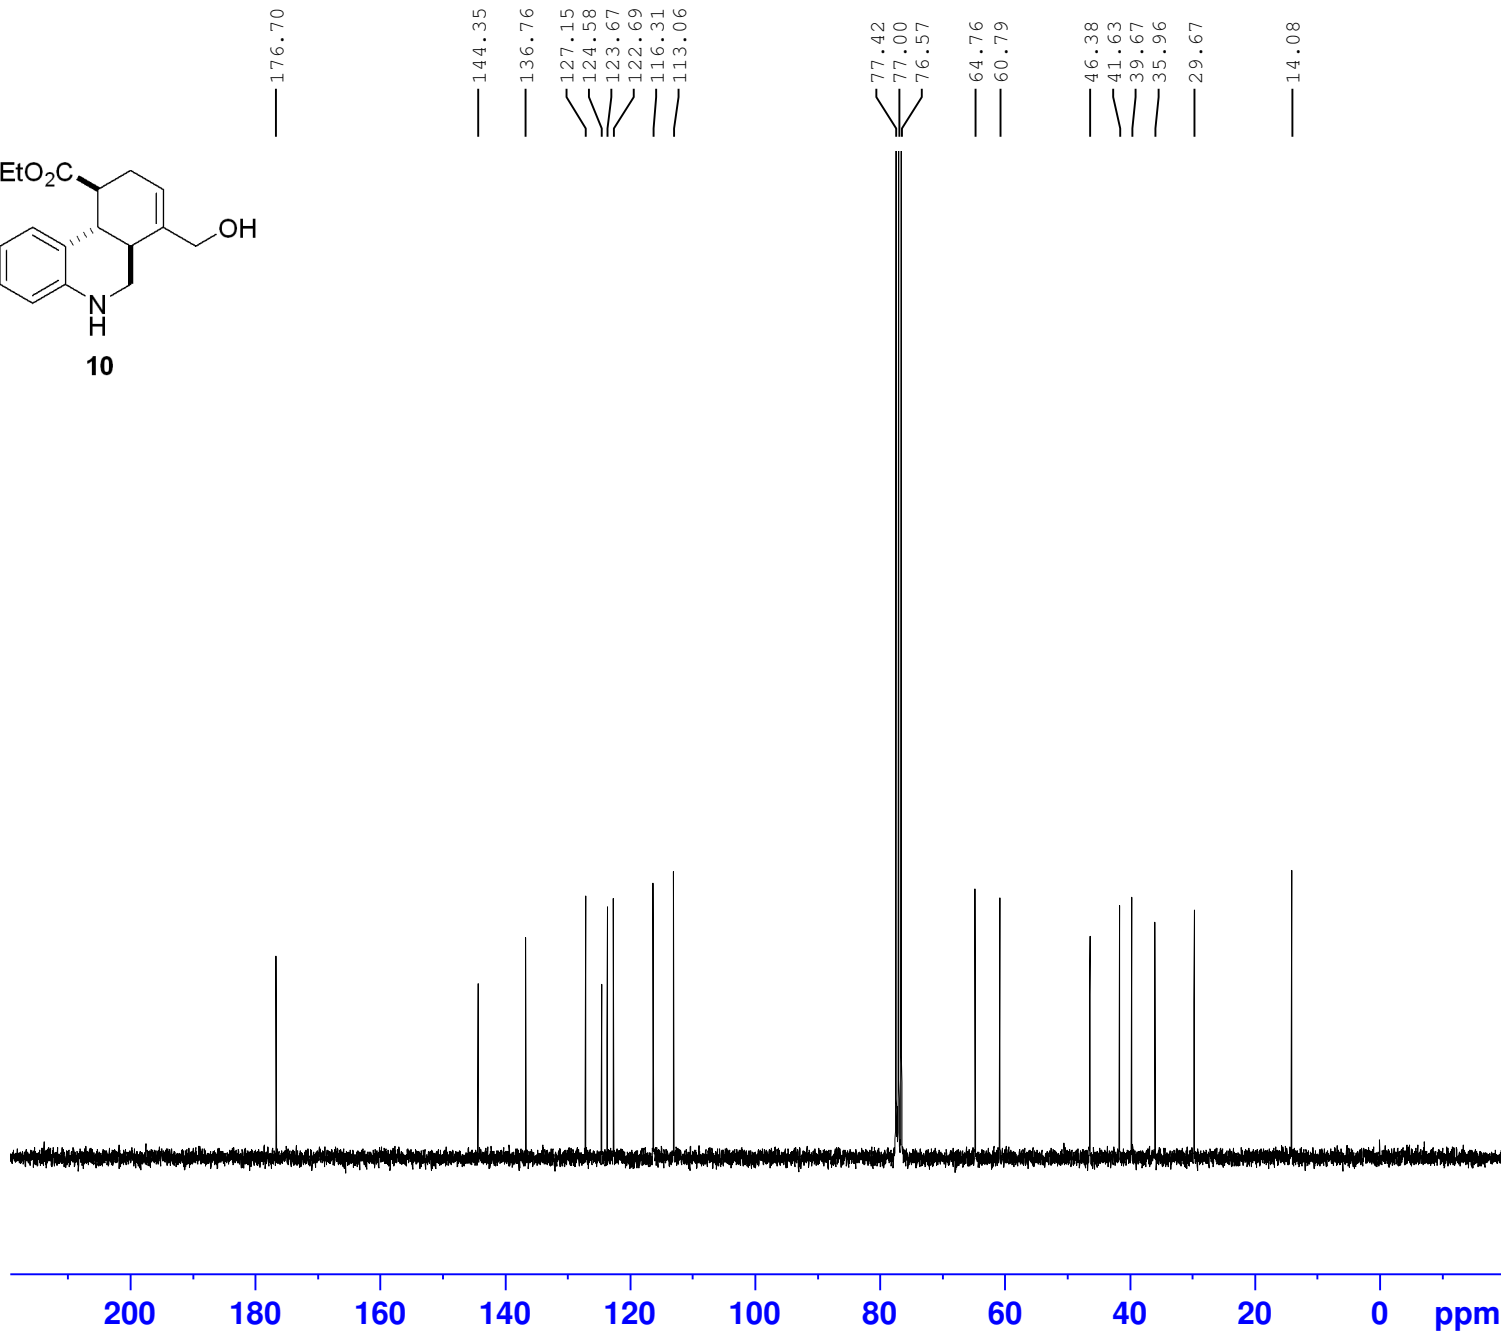

Current Data Parameters  
NAME 3-90  
EXPNO 5732  
PROCNO 1

F2 - Acquisition Parameters  
Date\_ 20211218  
Time 10.35  
INSTRUM spect  
PROBHD 5 mm PABBO BB-  
PULPROG zgpg30  
TD 65536  
SOLVENT CDCl3  
NS 600  
DS 4  
SWH 18028.846 Hz  
FIDRES 0.275098 Hz  
AQ 1.8175317 sec  
RG 203  
DW 27.733 usec  
DE 6.50 usec  
TE -59.1 K  
D1 2.00000000 sec  
D11 0.03000000 sec  
TD0 1

=====  
CHANNEL f1  
SFO1 75.4752949 MHz  
NUC1 13C  
P1 9.50 usec  
PLW1 34.20000076 W

=====  
CHANNEL f2  
SFO2 300.1312005 MHz  
NUC2 1H  
CPDPRG[2] waltz16  
PCPD2 90.00 usec  
PLW2 14.00000000 W  
PLW12 0.17284000 W  
PLW13 0.14000000 W

F2 - Processing parameters  
SI 32768  
SF 75.4677541 MHz  
WDW EM  
SSB 0  
LB 1.00 Hz  
GB 0  
PC 1.40

YZK-4-26

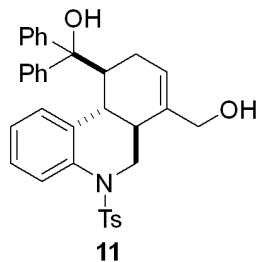

7.81  
7.80  
7.79  
7.78  
7.43  
7.41  
7.40  
7.37  
7.26  
7.25  
7.23  
7.22  
7.20  
7.20  
7.18  
7.17  
7.17  
7.16  
7.15  
7.14  
7.01  
6.99  
5.66  
5.65  
5.65  
4.14  
4.12  
4.11  
4.10  
3.99  
3.96  
3.93  
3.90  
3.81  
3.77  
3.76  
3.75  
2.31  
2.29  
2.27  
2.21  
2.08  
2.07  
2.07  
1.95  
1.94  
1.94  
1.91  
1.91  
1.90  
1.71

Current Data Parameters  
NAME 4-26  
EXPNO 1  
PROCNO 1

F2 - Acquisition Parameters

Date\_ 20220606  
Time 21.10 h  
INSTRUM Avance  
PROBHD z116098\_0833 (  
PULPROG zg30  
TD 65536  
SOLVENT CDC13  
NS 16  
DS 2  
SWH 8196.722 Hz  
FIDRES 0.250144 Hz  
AQ 3.9976959 sec  
RG 97.6563  
DW 61.000 usec  
DE 13.54 usec  
TE 292.9 K  
D1 1.00000000 sec  
TD0 1  
SFO1 400.1324708 MHz  
NUC1 1H  
P0 3.33 usec  
P1 10.00 usec  
PLW1 20.73200035 W

F2 - Processing parameters

SI 65536  
SF 400.1300100 MHz  
WDW EM  
SSB 0  
LB 0.30 Hz  
GB 0  
PC 1.00

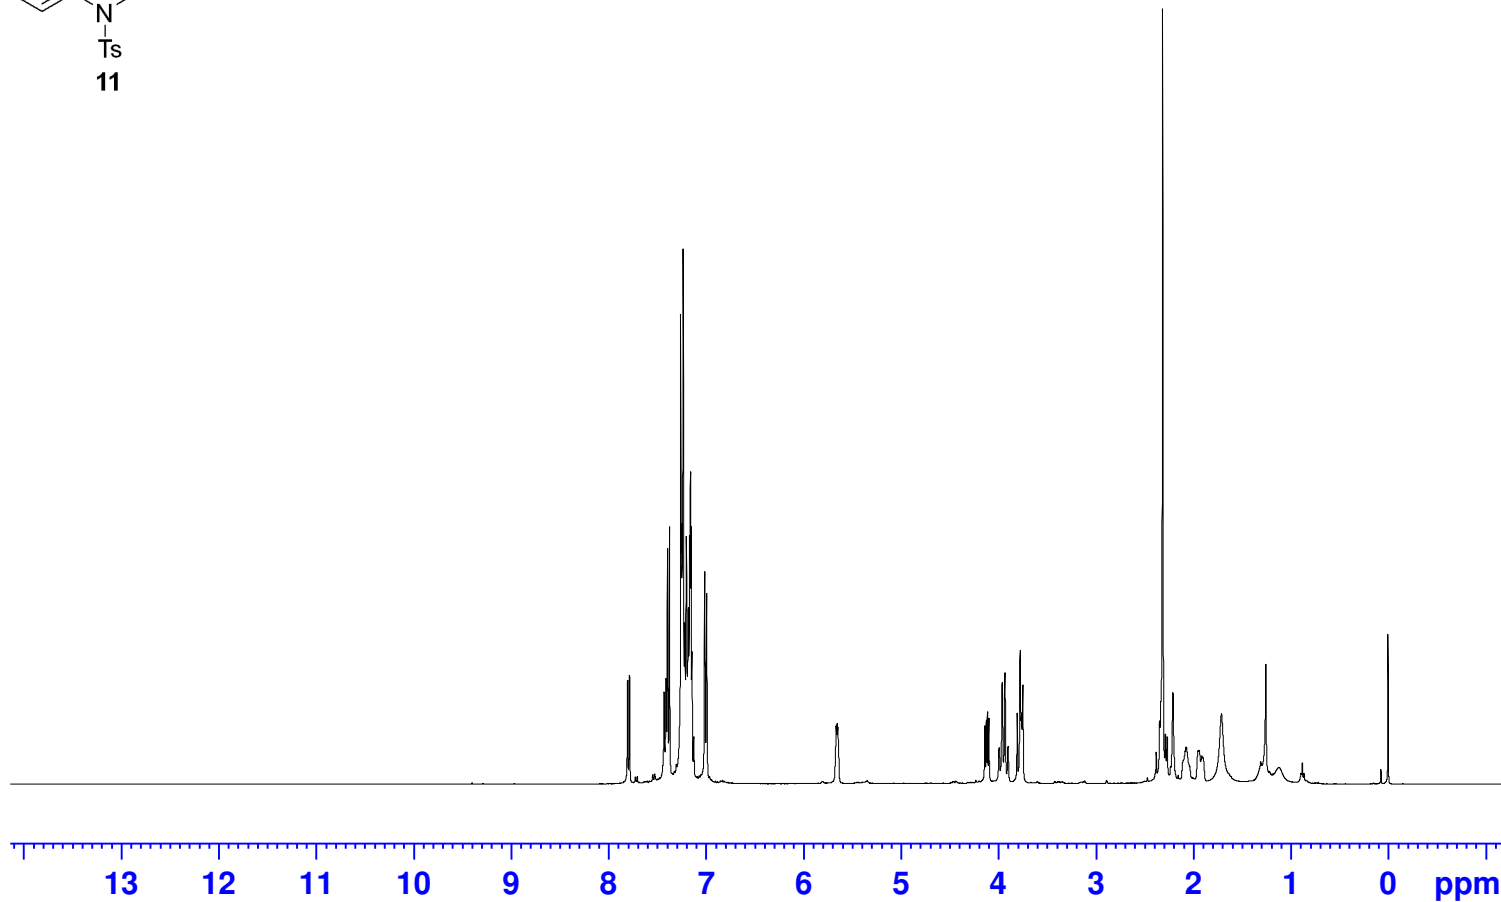

0.99  
3.25  
13.49  
2.01  
1.00  
1.09  
2.08  
2.06  
5.13  
1.06  
1.18  
1.12

YZK-4-26

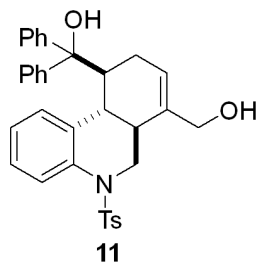

146.57  
146.20  
143.26  
139.27  
137.27  
136.27  
135.75  
129.43  
128.05  
127.86  
127.25  
127.10  
126.89  
126.84  
126.75  
126.70  
126.62  
126.00  
124.82  
123.80  
82.00  
77.32  
77.00  
76.68  
63.52  
48.19  
41.21  
40.43  
39.39  
25.36  
21.56

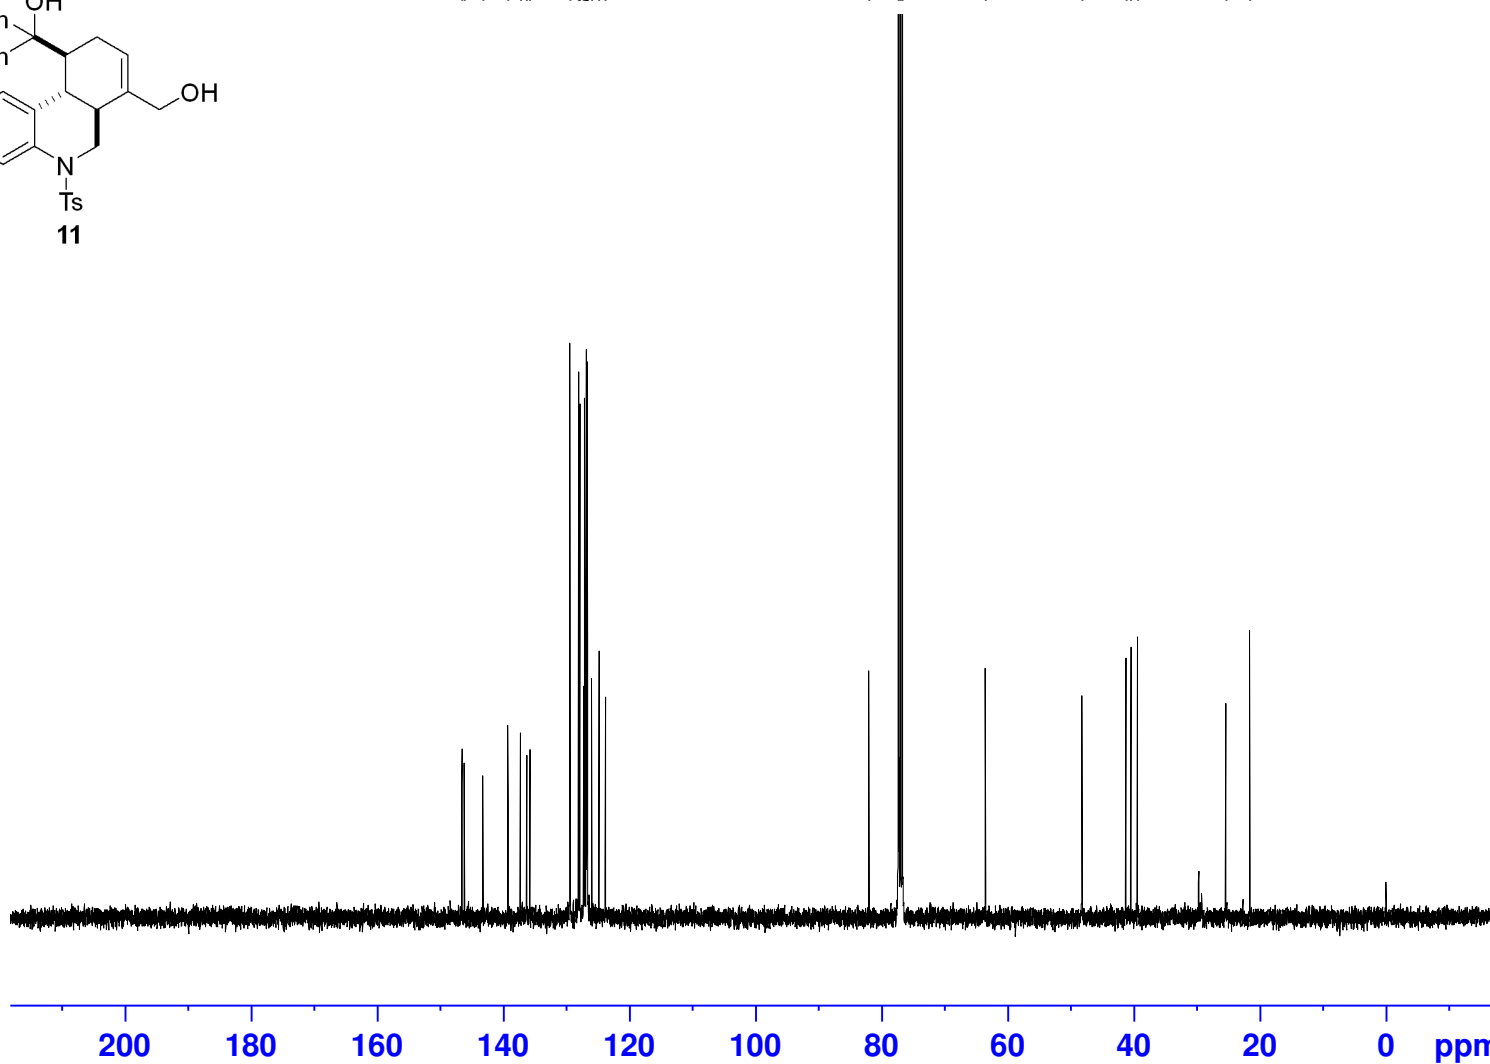

Current Data Parameters  
NAME 13-yzk-4-26-C  
EXPNO 1  
PROCNO 1

F2 - Acquisition Parameters  
Date\_ 20220605  
Time 17.34 h  
INSTRUM Avance  
PROBHD z116098\_0833 (  
PULPROG zgpg30  
TD 65536  
SOLVENT CDC13  
NS 1024  
DS 4  
SWH 23809.523 Hz  
FIDRES 0.726609 Hz  
AQ 1.3762560 sec  
RG 48.4406  
DW 21.000 usec  
DE 6.50 usec  
TE 298.6 K  
D1 2.00000000 sec  
D11 0.03000000 sec  
TD0 1  
SFO1 100.6228298 MHz  
NUC1 13C  
P0 3.33 usec  
P1 10.00 usec  
PLW1 87.89900208 W  
SFO2 400.1316005 MHz  
NUC2 1H  
CPDPRG[2] waltz65  
PCPD2 90.00 usec  
PLW2 20.73200035 W  
PLW12 0.25595000 W  
PLW13 0.12874000 W

F2 - Processing parameters  
SI 32768  
SF 100.6127727 MHz  
WDW EM  
SSB 0  
LB 1.00 Hz  
GB 0  
PC 1.40

YZK-4-10

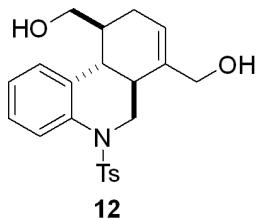

7.70  
7.68  
7.44  
7.42  
7.29  
7.28  
7.26  
7.20  
7.18  
7.17  
7.15  
5.76  
5.75  
4.08  
4.05  
4.01  
3.98  
3.97  
3.95  
3.94  
3.93  
3.87  
3.84  
3.48  
3.45  
3.42  
3.23  
3.22  
3.21  
3.19  
2.38  
2.12  
2.10  
2.07  
2.03  
2.02  
1.80  
1.76  
1.73  
1.62  
1.41  
1.25  
1.13  
1.10

Current Data Parameters  
NAME 4-10  
EXPNO 2  
PROCNO 1

F2 - Acquisition Parameters  
Date\_ 20220117  
Time 14.26 h  
INSTRUM Avance  
PROBHD Z116098\_0833 (  
PULPROG zg30  
TD 65536  
SOLVENT CDC13  
NS 16  
DS 2  
SWH 8196.722 Hz  
FIDRES 0.250144 Hz  
AQ 3.9976959 sec  
RG 101  
DW 61.000 usec  
DE 13.54 usec  
TE 293.0 K  
D1 1.00000000 sec  
TD0 1  
SFO1 400.1324708 MHz  
NUC1 1H  
P0 3.33 usec  
P1 10.00 usec  
PLW1 20.73200035 W

F2 - Processing parameters  
SI 65536  
SF 400.1300099 MHz  
WDW EM  
SSB 0  
LB 0.30 Hz  
GB 0  
PC 1.00

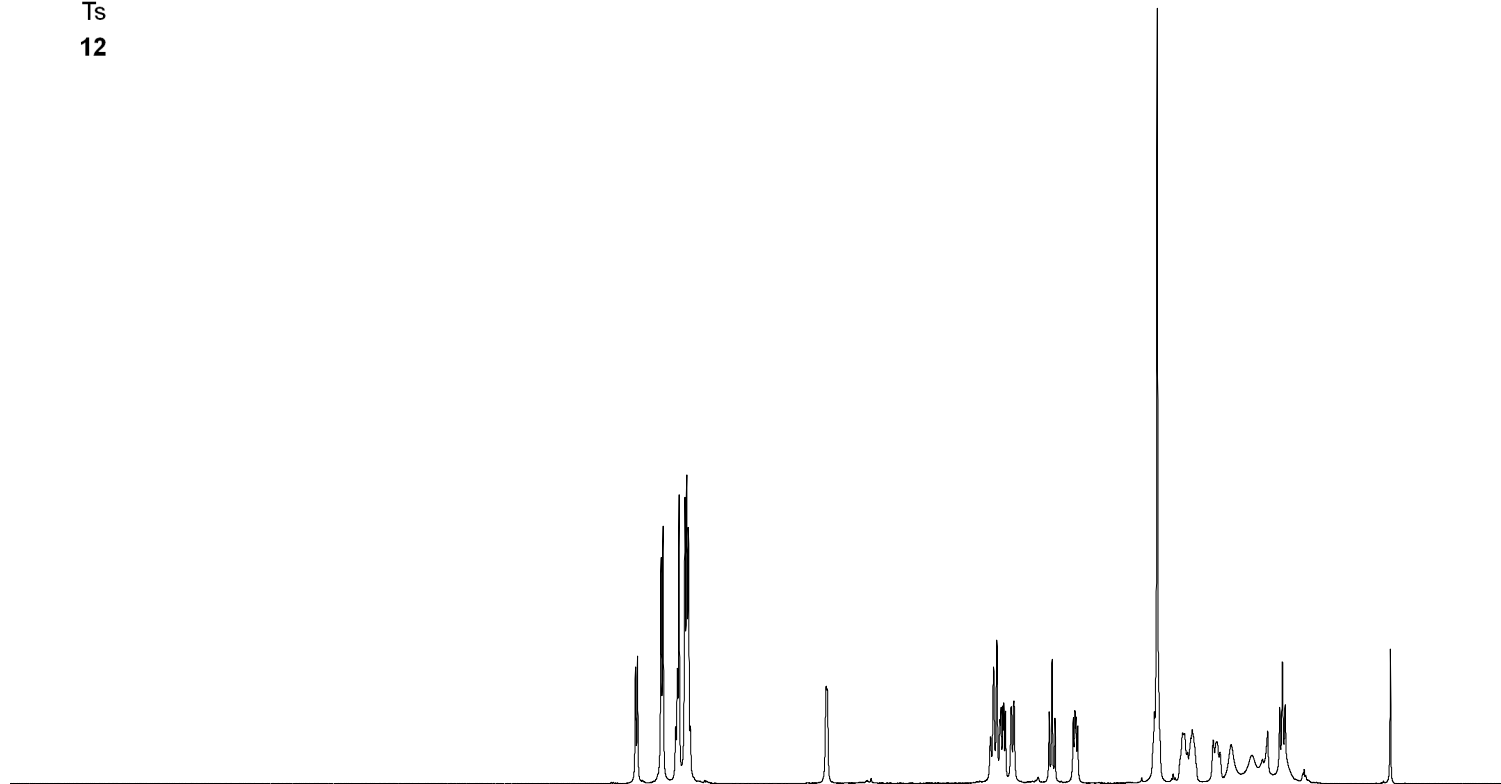

13 12 11 10 9 8 7 6 5 4 3 2 1 0 ppm

0.97  
2.04  
1.70  
4.03  
1.00  
3.06  
1.00  
1.03  
1.03  
4.07  
2.16  
1.11  
2.95

YZK-4-10

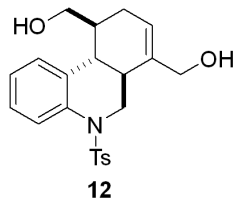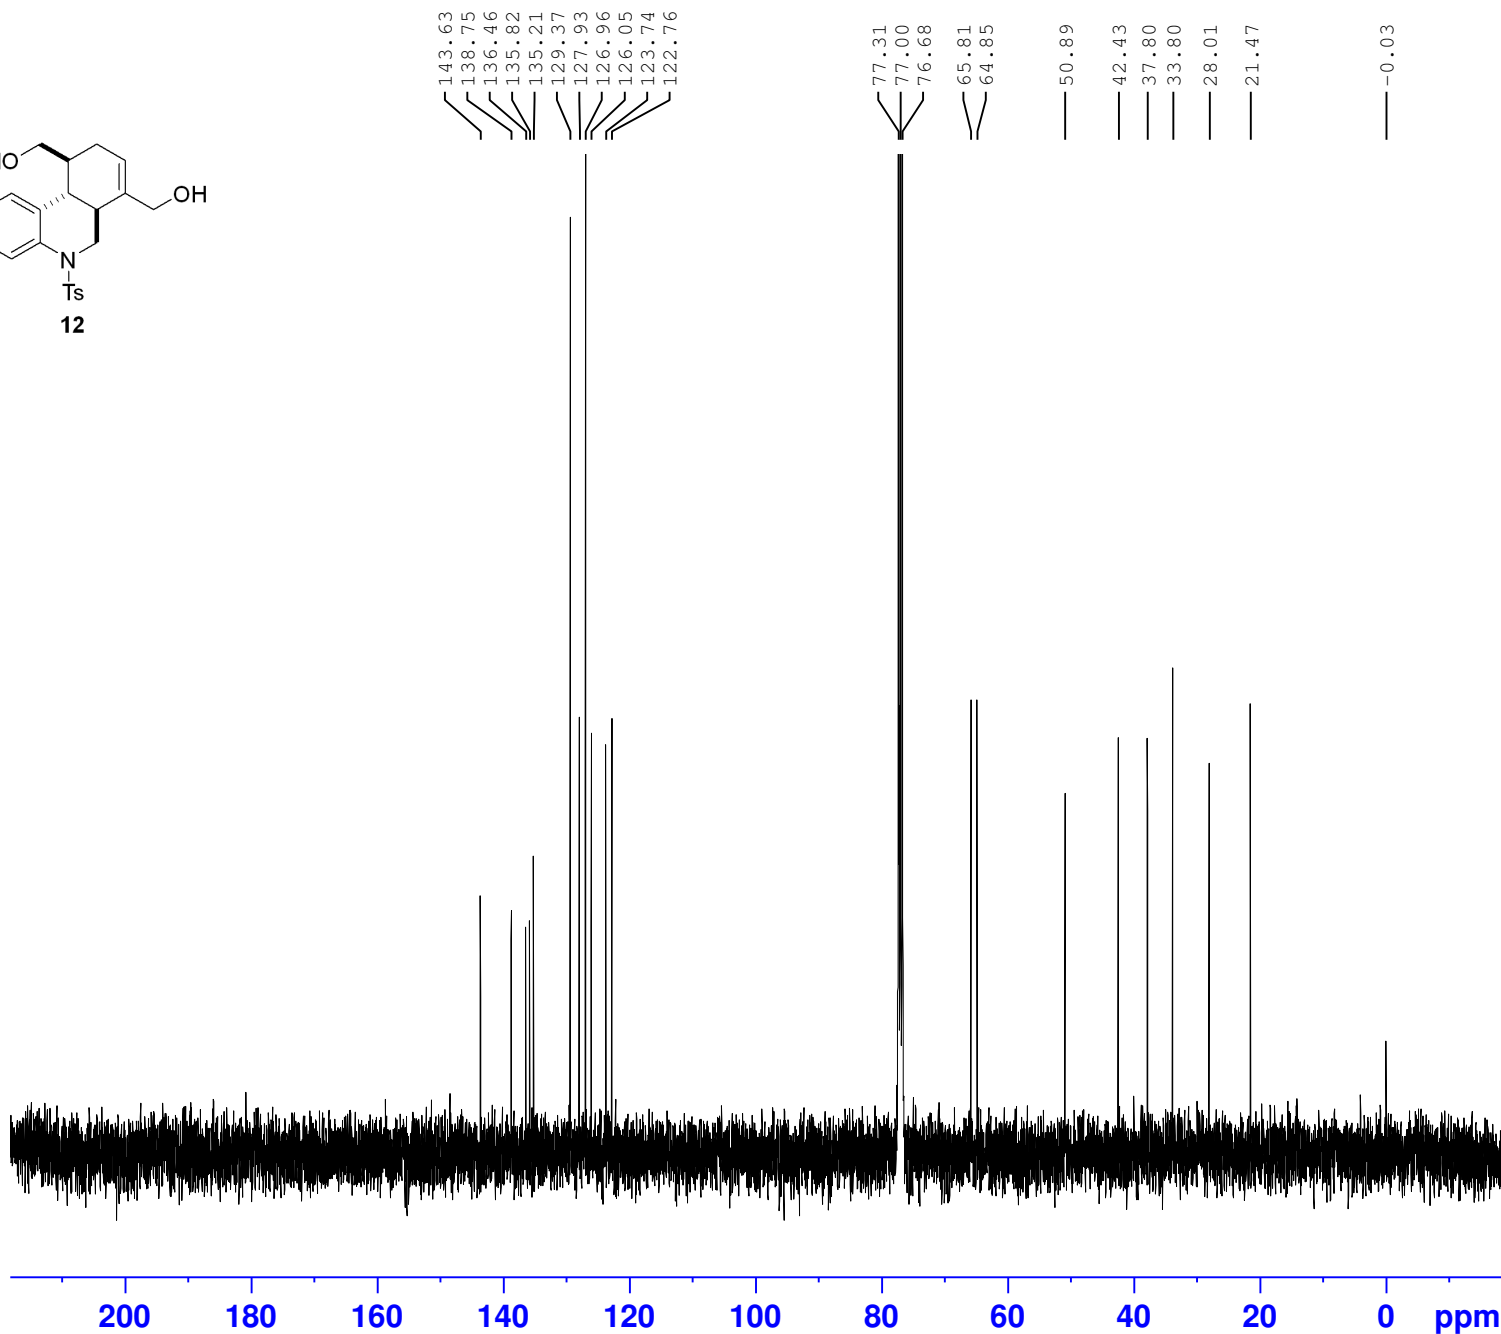

Current Data Parameters  
NAME wk  
EXPNO 4  
PROCNO 1

F2 - Acquisition Parameters  
Date\_ 20220118  
Time 0.40 h  
INSTRUM Avance  
PROBHD z116098\_0833 (  
PULPROG zgpg30  
TD 65536  
SOLVENT CDC13  
NS 1024  
DS 4  
SWH 23809.523 Hz  
FIDRES 0.726609 Hz  
AQ 1.3762560 sec  
RG 48.6724  
DW 21.000 usec  
DE 6.50 usec  
TE 294.9 K  
D1 2.00000000 sec  
D11 0.03000000 sec  
TD0 1  
SFO1 100.6228298 MHz  
NUC1 13C  
P0 3.33 usec  
P1 10.00 usec  
PLW1 87.89900208 W  
SFO2 400.1316005 MHz  
NUC2 1H  
CPDPRG[2] waltz65  
PCPD2 90.00 usec  
PLW2 20.73200035 W  
PLW12 0.25595000 W  
PLW13 0.12874000 W

F2 - Processing parameters  
SI 32768  
SF 100.6127727 MHz  
WDW EM  
SSB 0  
LB 1.00 Hz  
GB 0  
PC 1.40
